# Supplementary material for: Tuning efficiency of the 4-exo-trig cyclization by the electronic effect: ring closure of 3,3-difluoro-4-pentenyl carbon radicals and synthesis of a gem-difluorocyclobutane nucleoside
Source: Royal Society of Chemistry journal article supplement (doi:10.1039/c2cc35876j), 2012-01-01

## Supplementary Information

### Contents

|                                                                                                                                                                                             |      |
|---------------------------------------------------------------------------------------------------------------------------------------------------------------------------------------------|------|
| 1. General                                                                                                                                                                                  | S-2  |
| 2. Preparation of 5a                                                                                                                                                                        | S-2  |
| 3. Radical reaction of 5a: General procedure for the radical cyclization reaction                                                                                                           | S-3  |
| 4. Preparation of 5b                                                                                                                                                                        | S-4  |
| 5. Preparation of 5c                                                                                                                                                                        | S-5  |
| 6. Radical reaction of 5c                                                                                                                                                                   | S-7  |
| 7. Preparation of 5d                                                                                                                                                                        | S-7  |
| 8. Radical reaction of 5d                                                                                                                                                                   | S-8  |
| 9. Preparation of 5e                                                                                                                                                                        | S-8  |
| 10. Radical reaction of 5e                                                                                                                                                                  | S-9  |
| 11. Preparation of 5f                                                                                                                                                                       | S-9  |
| 12. Radical reaction of 5f                                                                                                                                                                  | S-10 |
| 13. Preparation of radical precursor 13                                                                                                                                                     | S-11 |
| 14. Radical cyclization of 13: Transformation to<br>[4-Benzyloxymethyl-3-( <i>tert</i> -butyldimethylsiloxy)-2,2-difluorocyclobutyl]-acetic<br>acid methyl ester (14) (Table 2,<br>entry 5) | S-14 |
| 15. Synthesis of 4                                                                                                                                                                          | S-15 |
| 16. Table SI-1                                                                                                                                                                              | S-18 |
| 17. <sup>1</sup> H and <sup>13</sup> C NMR spectra                                                                                                                                          | S-19 |

## 1. General

NMR ( $^1\text{H}$ ,  $^{13}\text{C}$ , and  $^{19}\text{F}$ ) spectra were recorded with a Jeol JNMAL-400 or Jeol JNM ECA-500 instruments ( $^1\text{H}$ , 500 or 400 MHz,  $^{13}\text{C}$ , 125 MHz,  $^{19}\text{F}$ , 470 MHz). Chemical shifts are reported relative to  $\text{Me}_4\text{Si}$ , except for fluorine-containing compounds where  $\text{CFCl}_3$  was used as an internal standard. Mass spectra (MS) were taken in FAB mode with *m*-nitrobenzyl alcohol as a matrix. Column chromatography was carried out on silica gel (Micro Bead Silica Gel PSQ 100B, Fuji Silysia Chemical Ltd.) or neutral silica gel (Silica Gel 60N, Kanto Chemical Co., Inc.). Thin-layer chromatography (TLC) was performed on precoated silica gel plate F<sub>254</sub>. THF was distilled from benzophenone ketyl.

## 2. Preparation of 5a

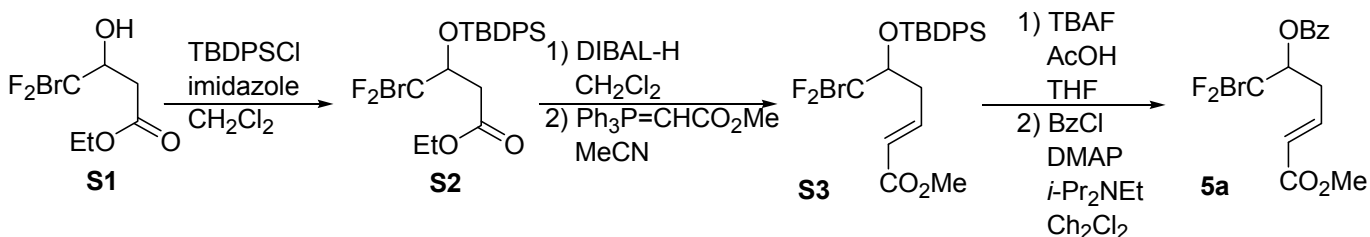

### 4-Bromo-3-(*tert*-butyldiphenylsilyloxy)-4,4-difluoro-butylric acid ethyl ester (S2)

To a  $\text{CH}_2\text{Cl}_2$  (27 mL) solution of S1<sup>1</sup> (4.56 g, 18.4 mmol) was added imidazole (2.13 g, 31.3 mmol) at 0 °C. After 20 min stirring of the resulting mixture, TBDPSCl (4.79 mL, 18.4 mmol) was dropwise added, then allowed to rt for 24 h. The mixture was partitioned between aq. saturated  $\text{NaHCO}_3$  and  $\text{CH}_2\text{Cl}_2$ . Column chromatography on silica gel (hexane/ $\text{Et}_2\text{O}$  = 10/1) of the organic layer gave S2 (7.77 g, 87%) as an oil:  $^1\text{H}$  NMR (400 MHz,  $\text{CDCl}_3$ )  $\delta$  1.06 (s, 9H), 1.12 (t,  $J$  = 7.2 Hz, 3H), 2.67-2.76 (m, 2H), 3.83-3.90 (m, 2H), 4.35-4.41 (m, 1H), 7.25-7.48 (m, 6H), 7.61-7.63 (m, 2H), 6.69-7.75 (m, 2H);  $^{13}\text{C}$  NMR (125 MHz,  $\text{CDCl}_3$ )  $\delta$  13.9, 19.4, 26.9, 38.9, 61.0, 74.2 (dd,  $J_{\text{C,F}}$  = 28.6 and 22.4 Hz), 124.5 (dd,  $J_{\text{C,F}}$  = 312.3 and 308.7 Hz), 127.5, 127.6, 129.8, 130.1, 131.5, 132.8, 135.8, 136.3, 169.1. HRFAB-MS ( $m/z$ ) 485.0959 ( $\text{M}^+\text{+H}$ ) calcd for  $\text{C}_{22}\text{H}_{28}\text{BrF}_2\text{O}_3\text{Si}$  ( $\text{M}^+\text{+H}$ ) 485.0959.

### 6-Bromo-5-(*tert*-butyldiphenylsilyloxy)-6,6-difluoro-hex-2-enoic acid methyl ester (S3)

To a stirred solution  $\text{CH}_2\text{Cl}_2$  (80 mL) of S2 (3.8 g, 7.83 mmol) was dropwise added DIBAL-H (1.0 mol.L in toluene, 15.7 mL, 15.7 mmol) over 3 min at -80 °C. The resulting mixture was stirred further 30 min at same temperature. To the mixture was added aq. saturated Rochelle salt (*ca.* 100 mL) then allowed to warm to rt. The mixture was filtrated through a celite pad, the filtrate was partitioned between brine and  $\text{CH}_2\text{Cl}_2$ . The resulting organic layer was dried by  $\text{Na}_2\text{SO}_4$  then evaporated all of volatiles. The residue was treated with MeCN (150 mL) and  $\text{Ph}_3\text{P}=\text{CHCO}_2\text{Me}$  (7.85 g, 23.5 mmol). The mixture was stirred further 14 h at rt. The mixture was partitioned between brine and AcOEt. Column chromatography on silica gel (hexane/AcOEt = 10/1) of the organic layer gave S3 (2.77 g, 71%) as an oil:  $^1\text{H}$  NMR (400 MHz,  $\text{CDCl}_3$ )  $\delta$  1.07 (s, 9H), 2.48-2.58 (m, 2H), 3.06 (s, 3H), 3.83-3.89 (m 1H), 5.67 (dt,  $J$  = 15.6 and 1.6 Hz, 1H), 6.67 (dt,  $J$  = 15.6 and 7.2 Hz, 1H), 7.38-7.48 (m, 6H), 7.66-7.68 (m, 4H);  $^{13}\text{C}$  NMR (125 MHz,  $\text{CDCl}_3$ )  $\delta$  19.5, 26.8, 36.1, 51.4, 76.4 (dd,  $J_{\text{C,F}}$  = 26.4 and 21.5 Hz), 124.2, 124.7 (dd,  $J_{\text{C,F}}$  = 312.3, and 308.8 Hz), 127.7, 127.8, 130.1, 130.2, 131.7, 132.4, 136.0, 136.1, 142.3, 166.1. HRFAB-MS ( $m/z$ ) 497.0983 ( $\text{M}^+\text{+H}$ ) calcd for  $\text{C}_{23}\text{H}_{28}\text{BrF}_2\text{O}_3\text{Si}$  ( $\text{M}^+\text{+H}$ ) 497.0959.

### Benzoic acid 1-(bromodifluoromethyl)-4-methoxycarbonyl-but-3-enyl ester (5a)

To a THF (30 mL) solution of S3 (1.39 g, 2.79 mmol) was added AcOH (176  $\mu\text{L}$ , 3.07 mmol) and TBAF (1.0 mol/L solution in THF, 3.07 mL, 3.07 mmol). The resulting mixture was stirred for 20 h at rt. The mixture was partitioned between aq. saturated  $\text{NaHCO}_3$  and  $\text{CH}_2\text{Cl}_2$ . After evaporation of all of volatiles, the residue was roughly purified by column chromatography on silica gel (hexane/AcOEt = 4.1) gave aclude alcohol. The residue was dissolved in  $\text{CH}_2\text{Cl}_2$  (30 mL), then treated with *i*-Pr<sub>2</sub>NEt

(486  $\mu$ L, 2.77 mmol), DMAP (342 mg, 2.79 mmol) and BzCl (392  $\mu$ L, 3.35 mmol). The mixture was stirred for 20 h at rt. The resulting mixture was partitioned between aq. saturated NaHCO<sub>3</sub> and CH<sub>2</sub>Cl<sub>2</sub>. Column chromatography on silica gel (hexane/Et<sub>2</sub>O = 3/1) of the organic layer gave **5a** (784 mg, 77%) as an oil: <sup>1</sup>H NMR (400 MHz, CDCl<sub>3</sub>)  $\delta$  2.77-2.86 (m, 1H), 2.88-2.95 (m, 1H), 3.69 (s, 3H), 5.67 (ddd,  $J$  = 16.8, 8.4 and 4.0 Hz, 1H), 5.97 (dt,  $J$  = 15.6 and 1.6 Hz, 1H), 6.89 (dt,  $J$  = 15.6 and 7.6 Hz, 1H), 7.47-7.51 (m, 2H), 7.60-7.65 (m, 1H), 8.07-8.09 (m, 2H); <sup>13</sup>C NMR (500 MHz, CDCl<sub>3</sub>)  $\delta$  32.4, 51.6, 74.0 (t,  $J_{C,F}$  = 31.1 Hz), 121.0 (t,  $J_{C,F}$  = 310.0 Hz), 125.1, 128.4, 128.6, 130.1, 133.9, 140.4, 164.6, 165.9. HRFAB-MS ( $m/z$ ) 363.0073 (M<sup>+</sup>+H) calcd for C<sub>14</sub>H<sub>14</sub>BrF<sub>2</sub>O<sub>4</sub> (M<sup>+</sup>+H) 363.0044.

1) Jagodzinska, M.; Huguenot, F.; Zanda, M. *Tetrahedron* **2007**, *63*, 2042.

### 3. Radical reaction of **5a**: General procedure for the redical cyclization reaction

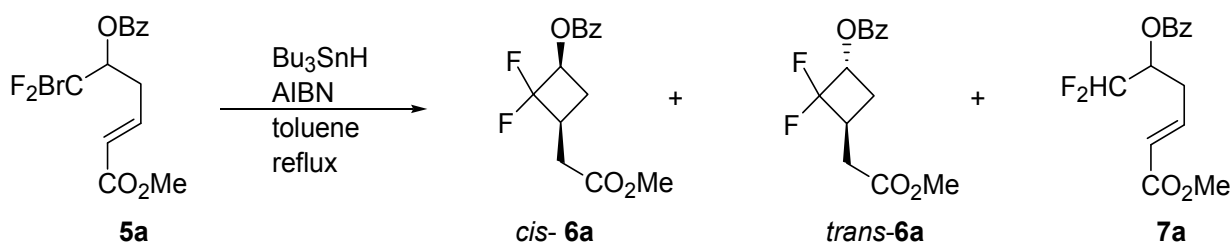

To a refluxing solution of **5** (337 mg, 0.93 mmol) in toluene (9 mL) was dropwise added a toluene (9 mL) solution of Bu<sub>3</sub>SnH (500  $\mu$ L, 1.86 mmol) and AIBN (31 mg, 0.19 mmol) over 4 h. The resulting mixture was stirred further 1 h at same temperature. After evaporation of all of volatiles, the residue was roughly purified by column chromatography on silica gel (hexane/Et<sub>2</sub>O = 3/1). The crude mixture was further purified by preparative TLC (hexane/AcOEt = 8/1). This gave a mixture of **7a** and **trans-6a** (102 mg, 39%, the ratio of **7a**/**trans-6a** = 100:22, based on the integration of <sup>1</sup>H NMR) and **cis-6a** (57 mg, 22%, as an oil).

**Physical data for cis-6a:** <sup>1</sup>H NMR (400 MHz, CDCl<sub>3</sub>)  $\delta$  1.67-1.75 (m, 1H), 2.55-2.79 (m, 3H), 2.87-2.99 (m, 1H), 3.71 (s, 1H), 5.35-5.44 (m, 1H), 7.44-7.48 (m, 2H), 7.57-7.61 (m, 1H), 8.04-8.08 (m, 2H); <sup>13</sup>C NMR (125 MHz, CDCl<sub>3</sub>)  $\delta$  26.5 (d,  $J_{C,F}$  = 19.1 Hz), 31.8 (d,  $J_{C,F}$  = 7.3 Hz), 36.5 (t,  $J_{C,F}$  = 21.5 Hz), 51.9, 70.3 (dd,  $J_{C,F}$  = 27.6 and 18.0 Hz), 119.5 (dd,  $J_{C,F}$  = 298.0 and 278.9 Hz), 128.5, 128.9, 129.9, 133.5, 165.1, 171.3. HRFAB-MS ( $m/z$ ) 285.0925 (M<sup>+</sup>+H) calcd for C<sub>14</sub>H<sub>15</sub>F<sub>2</sub>O<sub>4</sub> (M<sup>+</sup>+H) 285.0938.

#### NOE experiments of **cis-6a**

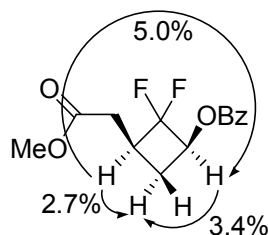

**Physical data for trans-6a:** The physical data for **trans-6a** is illustrated at later stage.

**Partial data for 7a:** <sup>1</sup>H NMR (400 MHz, CDCl<sub>3</sub>)  $\delta$  2.72-2.84 (m, 2H), 3.78 (s, 3H), 5.33-5.43 (m, 1H), 5.95 (ddd,  $J_{C,F}$  = 57.6 and 54.4 Hz,  $J$  = 3.2 Hz, 1H), 5.99 (dt,  $J$  = 15.6 and 1.6 Hz, 1H), 6.94 (dt,  $J$  = 15.6 and 7.2 Hz, 1H), 7.45-7.49 (m, 2H), 7.58-7.63 (m, 1H), 8.04-8.09 (m, 2H); <sup>13</sup>C NMR (125 MHz, CDCl<sub>3</sub>)  $\delta$  30.2, 51.6, 70.4 (t,  $J_{C,F}$  = 25.1 Hz), 113.4 (t,  $J_{C,F}$  = 246.6 Hz), 124.8, 128.6, 128.8, 129.9, 133.7, 141.4, 165.3, 166.1. FAB-MS ( $m/z$ ) 285 (M<sup>+</sup>+H).

#### 4. Preparation of 5b

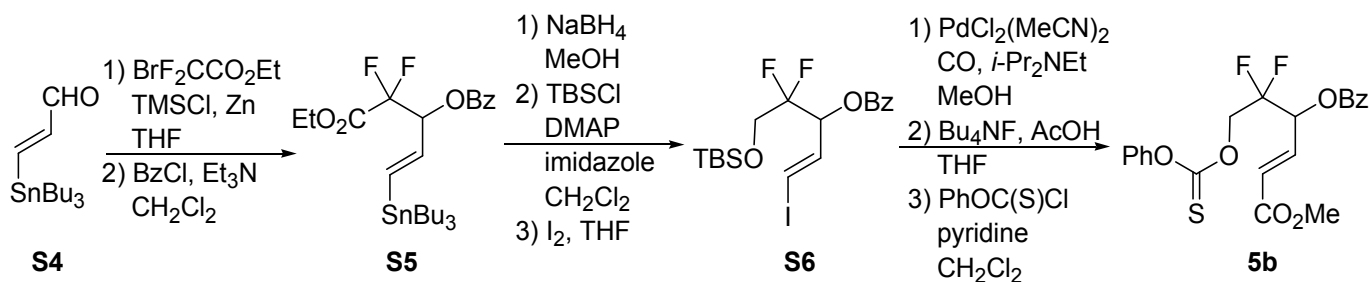

##### Benzoic acid 1-(ethoxycarbonyl-difluoromethyl)-3-tributylstannyl-allyl ester (S5)

To a THF (7 mL) suspension of activated Zn (1.38 g) was added TMSCl (190  $\mu$ L, 1.38 mmol). The resulting mixture was stirred at 60 °C for 15 min, then cooled to rt. To the mixture was added THF (30 mL) and BrF<sub>2</sub>CCO<sub>2</sub>Et (2.72 mL, 21.2 mmol) then heated at 60 °C for 3 min. A vigorous reflux was observed during this period. The resulting Zn enolate solution was quickly transferred to a THF (30 mL) solution of S4<sup>2</sup> (3.66 g, 10.6 mmol) at 0 °C, then the mixture was stirred at rt for 2 h. The mixture was partitioned between aq. saturated NaHCO<sub>3</sub> and AcOEt. Flush column chromatography on silica gel (hexane/Et<sub>2</sub>O = 3/1) of the organic layer gave a crude alcohol (*ca.* 4.86 g). To a CH<sub>2</sub>Cl<sub>2</sub> (50 mL) solution of above alcohol was added Et<sub>3</sub>N (2.22 mL, 15.9 mmol) and BzCl (1.49 mL, 12.7 mmol) at 0 °C. After 25h stirring of the resulting mixture at rt, this was partitioned between aq. saturated NaHCO<sub>3</sub> and CH<sub>2</sub>Cl<sub>2</sub>. Column chromatography on silica gel (hexane/Et<sub>2</sub>O = 11/1) of the organic layer gave S5 (5.28 g, 86% for two steps) as an oil: <sup>1</sup>H NMR (400 MHz, CDCl<sub>3</sub>)  $\delta$  0.82-0.98 (m, 15H), 1.22-1.33 (m, 9H), 1.54-1.57 (m, 6H), 4.25-4.33 (m, 2H), 5.89-6.12 (m, 2H), 6.54-6.74 (m, 1H), 7.44-7.48 (m, 2H), 7.58-7.62 (m, 1H), 8.01-8.08 (m, 2H); <sup>13</sup>C NMR (125 MHz, CDCl<sub>3</sub>)  $\delta$  9.6, 13.6, 13.9, 27.2, 29.0, 63.1, 75.0 (dd, *J*<sub>C,F</sub> = 29.8 and 25.0 Hz), 112.9 (dd, *J*<sub>C,F</sub> = 256.3 and 252.8 Hz), 128.6, 129.1, 130.0, 133.5, 135.3, 140.3, 162.5 (t, *J*<sub>C,F</sub> = 31.0 Hz), 164.5. HRFAB-MS (*m/z*) 575.2012 (M<sup>+</sup>+H) calcd for C<sub>26</sub>H<sub>41</sub>F<sub>2</sub>O<sub>4</sub>Sn (M<sup>+</sup>+H) 575.1995.

##### Benzoic acid 1-[2-(*tert*-butyldimethylsiloxy)-1,1-difluoroethyl]-3-iodoallyl ester (S6)

To a MeOH (50 mL) solution of S5 (5.11 g, 8.9 mmol) and AcOH (1.53 mL, 26.7 mmol) was portionwise added NaBH<sub>4</sub> (4.04 g, 106.8 mmol) at -40 °C. The resulting mixture was stirred at 0 °C for 1 h. The mixture was partitioned between aq. saturated NaHCO<sub>3</sub> and CHCl<sub>3</sub>. After evaporation of all of volatiles of the organic layer, crude alcohol was obtained. To a CH<sub>2</sub>Cl<sub>2</sub> (50 mL) solution of above alcohol was added DMAP (437 mg, 3.56 mmol), imidazole (727 mg, 10.68 mmol) and TBSCl (1.61 g, 10.68 mmol) at -40 °C. The resulting mixture was stirred at 0 °C for 13 h. The mixture was partitioned between aq. saturated NaHCO<sub>3</sub> and CHCl<sub>3</sub>. After evaporation of all of volatiles of the organic layer, crude silyl ether was obtained. This was treated with THF (100 mL) and I<sub>2</sub> (4.52 g, 17.8 mmol). After 1 h stirring at rt of the resulting mixture, this was partitioned between aq. saturated Na<sub>2</sub>S<sub>2</sub>O<sub>3</sub>, aq. saturated NaHCO<sub>3</sub> and AcOEt. Column chromatography on silica gel (hexane/Et<sub>2</sub>O = 15/1) of the organic layer gave S6 (2.83 g, 66% for three steps) as an oil: <sup>1</sup>H NMR (400 MHz, CDCl<sub>3</sub>)  $\delta$  0.00 (s, 3H), 0.03 (s, 3H), 0.86 (s, 9H), 3.80-3.93 (m, 2H), 5.83 (ddd, *J* = 14.8, 8.8 and 7.2 Hz, 1H), 6.69 (dd, *J* = 14.8 and 7.2 Hz, 1H), 6.78 (d, *J* = 14.8 Hz, 1H), 7.44-7.48 (m, 2H), 7.57-7.61 (m, 1H), 8.04-8.06 (m, 2H); <sup>13</sup>C NMR (125 MHz, CDCl<sub>3</sub>)  $\delta$  -5.7, 18.1, 25.6, 62.4 (dd, *J*<sub>C,F</sub> = 34.6 and 31.0 Hz), 72.6 (dd, *J*<sub>C,F</sub> = 32.4 and 25.1 Hz), 84.9, 119.2 (dd, *J*<sub>C,F</sub> = 251.3 and 247.8 Hz), 128.6, 129.1, 129.8, 133.6, 136.2, 164.4. HRFAB-MS (*m/z*) 483.0680 (M<sup>+</sup>+H) calcd for C<sub>18</sub>H<sub>26</sub>F<sub>2</sub>IO<sub>3</sub>Si (M<sup>+</sup>+H) 483.0664.

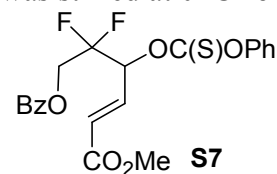

##### Benzoic acid 1-(1,1-difluoro-2-phenoxythiocarbonyloxyethyl)-3-methoxycarbonylallyl ester (5b)

A mixture of **S6** (2.65 g, 5.52 mmol), PdCl<sub>2</sub>(MeCN)<sub>2</sub> (285 mg, 1.1 mmol) and *i*-Pr<sub>2</sub>NEt (1.01 mL, 5.8 mmol) in MeOH (40 mL) was heated at 50 °C under positive pressure of CO (1 atm). After 1.5h heating of the resulting mixture, this was filtrated through a celite pad, then the filtrate was partitioned between aq. saturated NaHCO<sub>3</sub> and AcOEt. Evaporation of the organic layer gave a crude methyl acrylate (*ca.* 2.21 g). To a mixture of above acrylate and AcOH (379 μL, mmol) in THF (40 mL) was added Bu<sub>4</sub>NF (1.0 mol/L in THF, 6.62 mL, 6.62 mmol). The resulting mixture was stirred at rt for 3.5h. This was partitioned bwtween aq. saturated NaHCO<sub>3</sub> and AcOEt. Evaporation of the organic layer gave a crude alcohol. At this time, benzoyl migration was partially occurred to give an inseparable mixture (*ca.* 1:1). Therefore, this was used for next reaction without further purification. The mixture was dissolved in CH<sub>2</sub>Cl<sub>2</sub> (40 mL), then treated with pyridine (893 μL, 11.04 mmol) and PhOC(S)Cl (764 μL, 5.52 mmol) at 0 °C. After 1.5 h stirring of the resulting mixture, this was partitioned between aq. saturated NaHCO<sub>3</sub> and CH<sub>2</sub>Cl<sub>2</sub>. Column chromatography on silica gel (hexane/AcOEt = 3/1) gave a mixture of thiocarbonate **5b** and **S7** (*ca.* 1:1 mixture, 760 mg, 32% for three steps). Preparative TLC (hexane/AcOEt = 17/1, 8 times evolution) gave a pure **5b** as an oil: <sup>1</sup>H NMR (400 MHz, CD<sub>2</sub>Cl<sub>2</sub>) δ 3.74 (s, 1H), 4.82-4.98 (m, 2H), 6.06-6.14 (m, 1H), 6.25 (dd, *J* = 15.6 and 1,6 Hz, 1H), 7.02 (dd, *J* = 15.6 and 5.6 Hz, 1H), 7.07-7.09 (m, 2H), 7.30-7.34 (m, 1H), 7.41-7.45 (m, 2H), 7.49-7.53 (m, 2H), 7.63-7.67 (m, 1H), 8.10-8.12 (m, 2H); <sup>13</sup>C NMR (125 MHz, CD<sub>2</sub>Cl<sub>2</sub>) δ 52.3, 69.9 (dd, *J*<sub>C,F</sub> = 34.6 and 29.8 Hz), 70.9 (dd, *J*<sub>C,F</sub> = 32.2 and 26.2 Hz), 118.5 (t, *J*<sub>C,F</sub> = 248.0 Hz), 122.0, 126.7, 127.3, 128.8, 129.2, 130.1, 130.4, 134.5, 136.7, 153.9, 164.6, 165.6, 194.5. HRFAB-MS (*m/z*) 437.0861 (M<sup>+</sup>+H) calcd for C<sub>21</sub>H<sub>19</sub>F<sub>2</sub>O<sub>6</sub>S (M<sup>+</sup>+H) 437.0870.

2) Senapati, B. K.; Gao, L.; Lee, S. II; Hwang, G-S.; Ryu, D. H. *Org. Lett.* **2010**, *12*, 5088.

## 5. Preparation of 5c

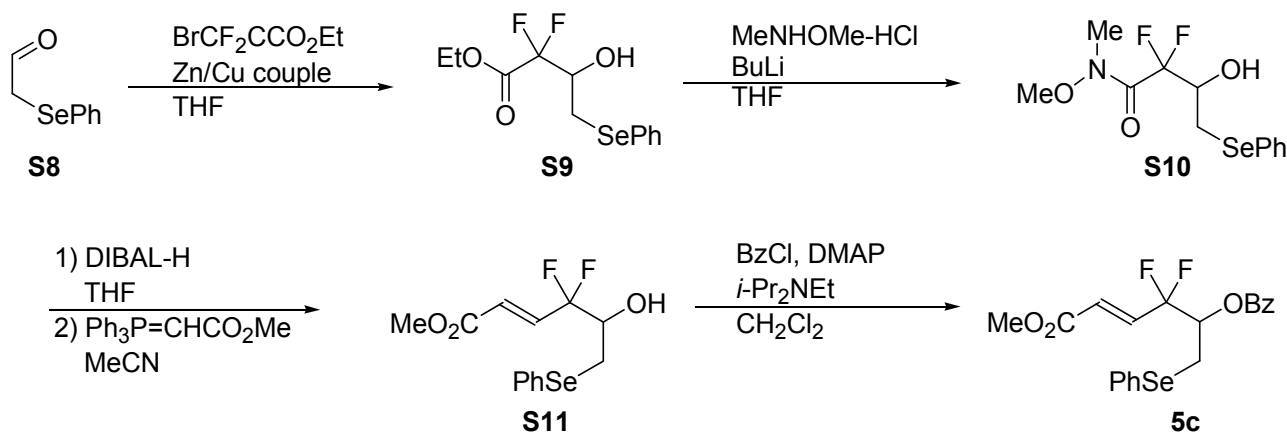

### 2,2-Difluoro-3-hydroxy-4-phenylselenenyl-butyric acid ethyl ester (**S9**)

To a stirring mixture of Cu(OAc)<sub>2</sub> (106 mg, 0.59 mmol) in AcOH (20 mL) was added activated Zn powder (1.9 g) at 110 °C. The resulting suspension was vigorously stirred further 3 min at same temperature. After decantation of most of AcOH, the crude Zn/Cu couple was sequentially washed by AcOH (20 mL) and Et<sub>2</sub>O (20 mL). To a THF (70 mL) suspension of above wet Zn/Cu couple was carefully added ethyl bromodifluoroacetate (3.0 mL, 23.4 mmol) at 80 °C, then refluxed further 5 min. The resulting zinc enolate was cooled at 0 °C. To this, a THF (20 mL) solution of **S8**<sup>3)</sup> (2.9 g, 14.6 mmol) was dropwise added. The resulting mixture was stirred at rt further 1 h. After filtration of the mixture through a celite pad, the filtrate was partitioned between aq. saturated NaHCO<sub>3</sub> and AcOEt. Column chromatography on silica gel (hexane/Et<sub>2</sub>O = 3/1) of the organic layer gave **S9** (2.98 g, 63%)



as an oil:  $^1\text{H}$  NMR (400 MHz,  $\text{CDCl}_3$ )  $\delta$  1.34 (t,  $J = 7.4$  Hz, 3H), 2.79 (br-s, 1H), 3.08 (dd,  $J = 12.6$  and 10.4 Hz, 1H), 3.26 (dd,  $J = 12.6$  and 3.0 Hz, 1H), 4.10-2.18 (m, 1H), 4.35 (q,  $J = 7.4$  Hz, 2H), 7.29-7.31 (m, 3H), 7.53-7.56 (m, 2H);  $^{13}\text{C}$  NMR (125 MHz,  $\text{CDCl}_3$ )  $\delta$  13.7, 28.2, 63.3, 70.3 (dd,  $J_{\text{C,F}} = 30.0$  and 25.2 Hz), 113.8 (dd,  $J_{\text{C,F}} = 259.1$  and 254.3 Hz), 127.8, 128.2, 129.4, 133.2, 163.0 (t,  $J_{\text{C,F}} = 32.2$  Hz). FAB-MS ( $m/z$ ) 324 ( $\text{M}^+\text{+H}$ ). Anal. Calcd for  $\text{C}_{12}\text{H}_{14}\text{F}_2\text{O}_3\text{Se} \cdot 1/2 \text{H}_2\text{O}$ : C, 43.39; H, 4.55. Found: C, 43.79; H, 4.24.

### 2,2-Difluoro-3-hydroxy-*N*-methoxy-*N*-methyl-4-phenylselenenyl butyramide (S10)

To a THF (150 mL) suspension of *N,O*-dimethylhydroxylamine hydrochloride (8.52 g, 81.4 mmol, previously dried by  $\text{P}_2\text{O}_5$  under vacuum condition for 2 days) was dropwise added BuLi (2.69 mol/L in hexane, 65.0 mL, 174.7 mmol) at  $-80^\circ\text{C}$ . The resulting solution was allowed to rt for 5 min. To the mixture was added **S9** (7.06 g, 21.8 mmol) in THF (50 mL) at  $-80^\circ\text{C}$  then rinsed by using further THF (20 mL). After 1 h stirring of the mixture, this was partitioned between aq. saturated  $\text{NH}_4\text{Cl}$  and AcOEt. Column chromatography on silica gel (hexane/AcOEt = 1/1) of the organic layer gave **S10** (5.24 g, 71%) as an oil:  $^1\text{H}$  NMR (400 MHz,  $\text{CDCl}_3$ )  $\delta$  3.06-3.17 (m, 2H), 3.23-3.26 (m, 4H), 3.73 (s, 3H), 4.30-4.38 (m, 1H), 7.21-7.31 (m, 3H), 7.51-7.56 (m, 2H);  $^{13}\text{C}$  NMR (125 MHz,  $\text{CDCl}_3$ )  $\delta$  27.7, 33.1, 62.2, 71.2 (dd,  $J_{\text{C,F}} = 28.6$  and 25.1 Hz), 115.3 (dd,  $J_{\text{C,F}} = 263.3$  and 259.6 Hz), 127.5, 129.4, 131.1, 133.1, 163.0. HRFAB-MS ( $m/z$ ) 340.0293 ( $\text{M}^+\text{+H}$ ) calcd for  $\text{C}_{12}\text{H}_{16}\text{F}_2\text{NO}_3\text{Se}$  ( $\text{M}^+\text{+H}$ ) 340.0263.

### 4,4-Difluoro-5-hydroxy-6-phenylselenohex-2-enoic acid methyl ester (S11)

To a THF (90 mL) solution of **S10** (3.75 g, 11.09 mmol) was dropwise added DIBAL-H (1.0 mol/L in toluene, 44.4 mL, 44.4 mmol) at  $-80^\circ\text{C}$ . After 15 min stirring of the resulting mixture, this was allowed to rt for 5 min. The mixture was partitioned between 0.5 N HCl and AcOEt. The organic layer was filtrated through a celite pad then the filtrate was evaporated. This gave a crude aldehyde, which was used to the next step without further purification. An MeCN (90 mL) solution of the aldehyde was treated with  $\text{Ph}_3\text{P}=\text{CHCO}_2\text{Me}$  (11.1 g, 33.3 mmol). The resulting suspension was stirred at rt for 15 h. This was partitioned between brine and AcOEt. Column chromatography on silica gel (hexane/AcOEt = 4/1) of the organic layer gave **S11** (2.07 g, 56%) as an oil:  $^1\text{H}$  NMR (400 MHz,  $\text{CDCl}_3$ )  $\delta$  2.78 (d,  $J = 4.0$  Hz, 1H), 2.87 (dd,  $J = 13.2$  and 10.4 Hz, 1H), 3.16 (dd,  $J = 13.2$  and 2.4 Hz, 1H), 3.72 (s, 3H), 3.79-3.82 (m, 1H), 6.25-6.28 (m, 1H), 6.80-6.90 (m, 1H), 7.20-7.24 (m, 3H), 7.46-7.48 (m, 2H);  $^{13}\text{C}$  NMR (125 MHz,  $\text{CDCl}_3$ )  $\delta$  29.3, 52.2, 71.7 (t,  $J_{\text{C,F}} = 30.6$  Hz), 118.8 (t,  $J_{\text{C,F}} = 245.5$  Hz), 126.4 (t,  $J_{\text{C,F}} = 8.4$  Hz), 127.9, 128.1, 129.4, 133.3, 136.6 (t,  $J_{\text{C,F}} = 26.4$  Hz), 165.2. HRFAB-MS ( $m/z$ ) 336.0089 ( $\text{M}^+\text{+H}$ ) calcd for  $\text{C}_{13}\text{H}_{14}\text{F}_2\text{O}_3\text{Se}$  ( $\text{M}^+\text{+H}$ ) 336.0076.

### Benzoic acid 2,2-difluoro-4-methoxycarbonyl-1-phenylselenomethyl-but-3-enyl ester (5c)

To a  $\text{CH}_2\text{Cl}_2$  (20 mL) solution of **S11** (623 mg, 1.86 mmol) was added DMAP (228 mg, 1.86 mmol), *i*- $\text{Pr}_2\text{NEt}$  (648  $\mu\text{L}$ , 3.72 mmol) and BzCl (326  $\mu\text{L}$ , 2.79 mmol) at  $0^\circ\text{C}$ . The resulting mixture was stirred at  $0^\circ\text{C}$  for 4 h. The mixture was partitioned between aq. saturated  $\text{NaHCO}_3$  and  $\text{CH}_2\text{Cl}_2$ . Column chromatography on silica gel (hexane/AcOEt = 6/1) of the organic layer gave **5c** (639 mg, 78%) as an oil:  $^1\text{H}$  NMR (400 MHz,  $\text{CDCl}_3$ )  $\delta$  3.20 (dd,  $J = 13.6$  and 10.0 Hz, 1H), 3.33 (dd,  $J = 13.6$  and 3.2 Hz, 1H), 3.78 (s, 3H), 5.63-5.68 (m, 1H), 6.36 (d,  $J = 15.6$  Hz, 1H), 6.81-6.91 (m, 1H), 7.23-7.24 (m, 3H), 7.44-7.47 (m, 2H), 7.52-7.54 (m, 2H), 7.59-7.63 (m, 1H), 7.97-7.99 (m, 2H);  $^{13}\text{C}$  NMR (125 MHz,  $\text{CDCl}_3$ )  $\delta$  26.6, 52.2, 72.5 (t,  $J_{\text{C,F}} = 29.8$  Hz), 117.9 (dd,  $J_{\text{C,F}} = 245.6$  and 243.2 Hz), 126.9 (t,  $J_{\text{C,F}} = 8.3$  Hz), 127.8, 128.6, 128.7, 129.2, 129.9, 133.5, 133.7, 136.0 (t,  $J_{\text{C,F}} = 25.0$  Hz), 164.9, 164.9. HRFAB-MS ( $m/z$ ) 440.0353 ( $\text{M}^+\text{+H}$ ) calcd for  $\text{C}_{20}\text{H}_{18}\text{F}_2\text{O}_4\text{Se}$  ( $\text{M}^+\text{+H}$ ) 440.0338.

## 6. Radical reaction of 5c

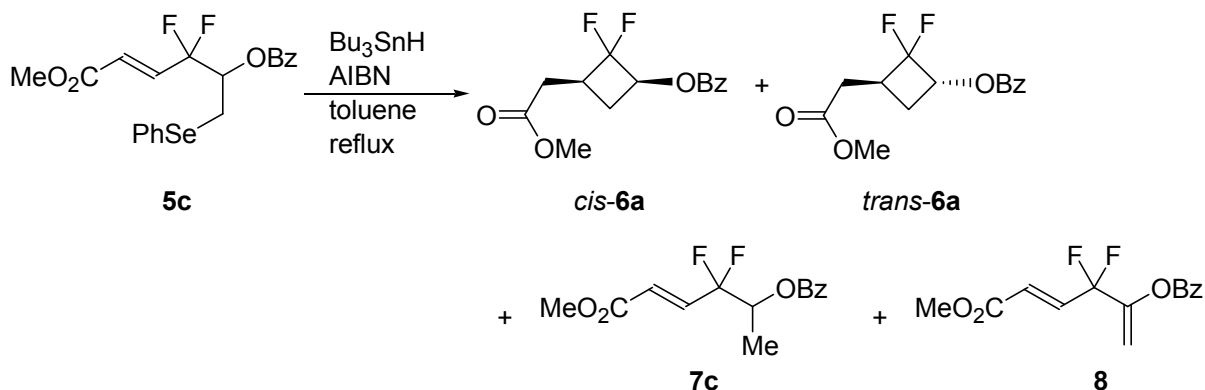

Compound **5c** (220 mg, 0.5 mmol) was treated by the procedure described for the reaction of **5a**. Column chromatography on silica gel (hexane/Et<sub>2</sub>O = 9/1) gave an inseparable mixture of **7c** and **8** (27 mg, 12% and 7% respectively, calculated by integration of <sup>1</sup>H NMR) and a mixture of **6a** (hexane/Et<sub>2</sub>O = 5/1). This was purified by preparative TLC (hexane/AcOEt = 20/1, 7 times evolution). This gave *cis-6a* (60 mg, 48%, oil) and *trans-6a* (31 mg, 24%, oil) respectively.

**Physical data for *trans-6a***: <sup>1</sup>H NMR (400 MHz, CDCl<sub>3</sub>) δ 2.05-2.14 (m, 1H), 2.19-2.29 (m, 1H), 2.46 (dd, *J* = 16.8 and 8.8 Hz, 1H), 2.65-2.72 (m, 1H), 3.65 (s, 3H), 5.40-5.48 (m, 1H), 7.34-7.41 (m, 2H), 7.51-7.55 (m, 1H), 8.00-8.02 (m, 2H); <sup>13</sup>C NMR (125 MHz, CDCl<sub>3</sub>) δ 26.0 (dd, *J*<sub>C,F</sub> = 10.9 and 4.9 Hz), 33.0 (d, *J*<sub>C,F</sub> = 22.8 Hz), 52.2, 72.2 (dd, *J*<sub>C,F</sub> = 30.0 and 19.1 Hz), 119.2 (t, *J*<sub>C,F</sub> = 289.6 Hz), 128.5, 129.0, 129.9, 133.4, 165.2, 171.3. HRFAB-MS (*m/z*) 285.0961 (*M*<sup>+</sup>+H) calcd for C<sub>14</sub>H<sub>15</sub>F<sub>2</sub>O<sub>4</sub> (*M*<sup>+</sup>+H) 285.0938.

### NOE experiments of *trans-6a*

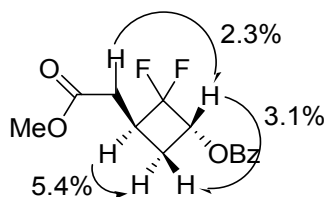

**Physical data for **7c** and **8****: <sup>1</sup>H NMR (400 MHz, CDCl<sub>3</sub>) δ 1.38 (d, *J* = 6.4 Hz, 3H), 3.77 (s, 4.8H), 5.33-5.40 (m, 1H), 5.46 (dd, *J* = 3.2 and 1.2 Hz, 0.6H), 5.59 (d, *J* = 3.2 Hz, 0.6H), 6.28-6.38 (m, 1.6H), 6.79-6.91 (m, 1.6H), 7.37-7.49 (m, 3.2H), 7.56-7.63 (m, 1.6H), 8.00-8.07 (m, 3.2H); <sup>13</sup>C NMR for **7c** (125 MHz, CDCl<sub>3</sub>) δ 13.7, 52.2, 70.4 (t, *J*<sub>C,F</sub> = 31.0 Hz), 118.3 (t, *J*<sub>C,F</sub> = 242.0 Hz), 126.7 (t, *J*<sub>C,F</sub> = 8.4 Hz), 128.5, 129.8, 130.2, 133.6, 136.4 (t, *J*<sub>C,F</sub> = 25.1 Hz), 165.1; <sup>13</sup>C NMR for **8** (125 MHz, CDCl<sub>3</sub>) δ 52.2, 107.2 (t, *J*<sub>C,F</sub> = 3.6 Hz), 114.2 (t, 232.3 Hz), 126.3 (t, *J*<sub>C,F</sub> = 8.3 Hz), 128.8, 129.2, 129.9, 134.0, 137.1 (t, *J*<sub>C,F</sub> = 28.6 Hz), 146.3 (t, *J*<sub>C,F</sub> = 29.8 Hz), 165.0. FAB-MS (*m/z*) 285 (*M*<sup>+</sup>+H) for **7c**, 263 (*M*<sup>+</sup>-F) for **8**.

## 7. Preparation of 5d

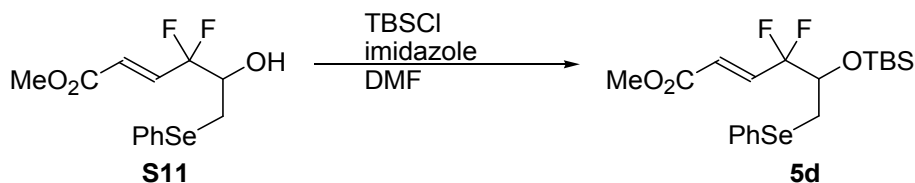

### 5-(*tert*-Butyldimethylsilyloxy)-4,4-difluoro-6-phenylseleno-hex-2-enoic acid methyl ester (**5d**)

To a DMF (6 mL) solution of **S11** (373 mg, 1.11 mmol) was added imidazole (302 mg, 4.44 mmol) and TBSCl (335 mg, 2.22 mmol). The resulting solution was stirred at rt for 4 days. The mixture was partitioned between aq. saturated NaHCO<sub>3</sub> and AcOEt. Column chromatography on silica gel (hexane/AcOEt = 11/1) of the organic layer gave **5d** (260 mg, 52%) as an oil: <sup>1</sup>H NMR (400 MHz,

CDCl<sub>3</sub>) δ -0.06 (s, 3H), 0.00 (s, 3H), 0.76 (s, 9H), 2.71 (dd, *J* = 12.4 and 4.8 Hz, 1H), 2.98 (dt, *J* = 12.4 and 2.8 Hz, 1H), 3.66 (s, 3H), 3.94-4.01 (m, 1H), 6.17 (dq, *J* = 16.0 and 1.2 Hz, 1H), 6.75 (ddd, *J* = 16.0, 14.8 and 9.6 Hz, 1H), 7.09-7.15 (m, 3H), 7.31-7.34 (m, 2H); <sup>13</sup>C NMR (125 MHz, CDCl<sub>3</sub>) δ -4.7, -4.4, .18.2, 25.8 29.5 (d, *J*<sub>C,F</sub> = 6.0 Hz), 52.2, 74.5 (dd, *J*<sub>C,F</sub> = 32.2 and 27.4 Hz), 119.4 (t, *J*<sub>C,F</sub> = 244.4 Hz), 126.3 (t, *J*<sub>C,F</sub> = 7.2 Hz), 127.1, 129.2, 130.1, 132.4, 136.4 (t, *J*<sub>C,F</sub> = 25.0 Hz), 165.3. HRFAB-MS (*m/z*) 451.0967 (M<sup>+</sup>+H) calcd for C<sub>19</sub>H<sub>29</sub>F<sub>2</sub>O<sub>3</sub>SiSe (M<sup>+</sup>+H) 451.1019.

## 8. Radical reaction of 5d

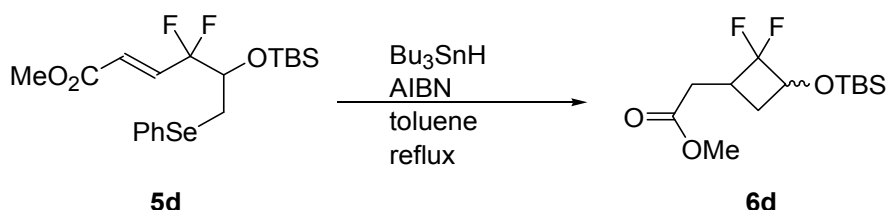

Compound **5d** (2.17 g, 4.82 mmol) was treated by the procedure described for the reaction of **5a**. Column chromatography on silica gel (hexane/Et<sub>2</sub>O = 15/1) gave **6d** (1.29 g, 91%, *ca.* 2:1 of inseparable mixture) as an oil:

**Physical data for 6d:** <sup>1</sup>H NMR (500 MHz, CDCl<sub>3</sub>) δ 0.08 (s, 1.5H), 0.09 (s, 3H), 0.10 (s, 1.5H), 0.10 (s, 3H), 0.90 (s, 13.5H), 1.35-1.42 (m, 1H), 1.87-1.90 (m, 1H), 2.35-2.41 (m, 1.5H), 2.48-2.53 (m, 1H), 2.57-2.70 (m, 2.5H), 3.05-3.10 (m, 0.5H), 3.69 (s, 3H), 3.69 (s, 1.5H), 4.26-4.33 (m, 1H), 4.42-4.48 (m, 0.5H); <sup>13</sup>C NMR (125 MHz, CDCl<sub>3</sub>) of *cis*-**6d**: δ -5.2, -5.0, 18.1, 25.6, 29.6 (d, *J*<sub>C,F</sub> = 22.8 Hz), 31.8 (d, *J*<sub>C,F</sub> = 7.2 Hz), 35.0 (t, *J*<sub>C,F</sub> = 22.7 Hz), 51.8, 70.4 (dd, *J*<sub>C,F</sub> = 25.0 and 17.9 Hz), 121.2 (dd, *J*<sub>C,F</sub> = 296.9 and 277.8 Hz), 171.8. <sup>13</sup>C NMR (125 MHz, CDCl<sub>3</sub>) of *trans*-**6d**: δ -5.2, -5.0, 18.1, 25.6, 29.0 (dd, *J*<sub>C,F</sub> = 14.4 and 3.6 Hz), 33.5 (d, *J*<sub>C,F</sub> = 3.6 Hz), 37.5 (t, *J*<sub>C,F</sub> = 21.5 Hz), 51.8, 71.8 (dd, *J*<sub>C,F</sub> = 27.4 and 19.1 Hz), 120.5 (dd, *J*<sub>C,F</sub> = 290.9 and 286.2 Hz), 171.6. HRFAB-MS (*m/z*) 295.1537 (M<sup>+</sup>+H) calcd for C<sub>13</sub>H<sub>25</sub>F<sub>2</sub>O<sub>3</sub>Si (M<sup>+</sup>+H) 295.1541.

**NOE experiments of 6d:** The NOE experiments were carried out as a mixture of two diastereomers.

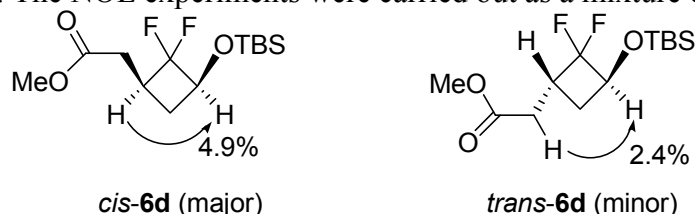

## 9. Preparation of 5e

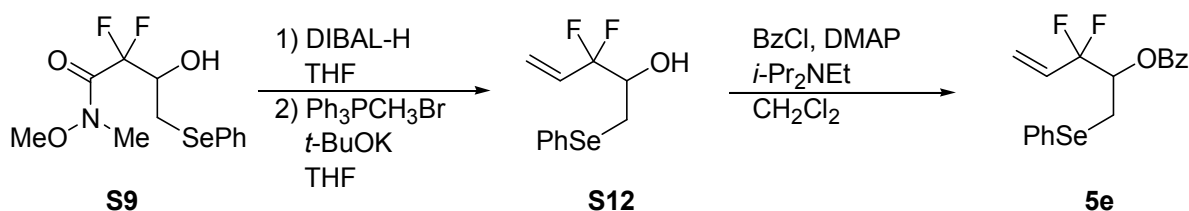

### 3,3-Difluoro-1-phenylselenopent-4-en-2-ol (**S12**)

To a THF (30 mL) solution of **S9** (1.25 g, 3.7 mmol) was dropwise added DIBAL-H (1.0 mol/L in toluene, 14.8 mL, 14.8 mmol) at -80 °C. The resulting mixture was allowed to rt for 5 min. This was partitioned between 0.5 N HCl and AcOEt. The organic layer was dried by Na<sub>2</sub>SO<sub>4</sub>, then through a celite pad. Evaporation of the filtrate gave a crude aldehyde (*ca.* 1.12 g). This was used for the next step without further purification. To a THF (20 mL) suspension of Ph<sub>3</sub>PCH<sub>3</sub>Br (4.64 g, 13.0 mmol) was dropwise added *t*-BuOK (1.0 mol/L in THF, 11.1 mL, 11.1 mmol) at 0 °C. The resulting yellowish



suspension was stirred at rt for 1 h. To the mixture was added above aldehyde in THF (20 mL) at  $-80\text{ }^{\circ}\text{C}$ . The mixture was stirred further 1 h at rt. The mixture was partitioned between aq. saturated  $\text{NH}_4\text{Cl}$  and AcOEt. Column chromatography on silica gel (hexane/ $\text{Et}_2\text{O}$  = 4/1) gave **S12** (757 mg, 74%) as an oil:  $^1\text{H}$  NMR (400 MHz,  $\text{CDCl}_3$ )  $\delta$  2.67 (d,  $J$  = 4.0 Hz, 1H), 2.95 (dd,  $J$  = 13.2 and 10.4 Hz, 1H), 3.23 (dd,  $J$  = 13.2 and 2.8 Hz, 1H), 3.83-3.92 (m, 1H), 5.56 (d,  $J$  = 10.8 Hz, 1H), 5.70-5.75 (m, 1H), 5.94-6.07 (m, 1H), 7.27-7.31 (m, 3H), 7.52-7.56 (m, 2H);  $^{13}\text{C}$  NMR (125 MHz,  $\text{CDCl}_3$ )  $\delta$  29.4, 71.9 (t,  $J_{\text{C,F}}$  = 29.9 Hz), 119.3 (t,  $J_{\text{C,F}}$  = 245.4 Hz), 121.5 (t,  $J_{\text{C,F}}$  = 9.5 Hz), 127.7, 128.5, 129.4, 129.6 (t,  $J_{\text{C,F}}$  = 26.4 Hz), 133.2. HRFAB-MS ( $m/z$ ) 278.0015 ( $\text{M}^+\text{+H}$ ) calcd for  $\text{C}_{11}\text{H}_{12}\text{F}_2\text{OSe}$  ( $\text{M}^+\text{+H}$ ) 278.0021.

### Benzoic acid 2,2-difluoro-1-phenylselenomethyl-but-3-enyl ester (**5e**)

To a  $\text{CH}_2\text{Cl}_2$  (25 mL) solution of **S12** (680 mg, 2.45 mmol) was treated with BzCl (374  $\mu\text{L}$ , 3.2 mmol), DMAP (601 mg, 4.9 mmol) and  $i\text{-Pr}_2\text{NEt}$  (854  $\mu\text{L}$ , 4.0 mmol). The resulting solution was stirred at  $0\text{ }^{\circ}\text{C}$  for 3 h. The mixture was partitioned between aq. saturated  $\text{NaHCO}_3$  and  $\text{CH}_2\text{Cl}_2$ . Column chromatography on silica gel (hexane/AcOEt = 9/1) gave **5e** (874 mg, 94%) as an oil:  $^1\text{H}$  NMR (400 MHz,  $\text{CDCl}_3$ )  $\delta$  3.20 (dd,  $J$  = 13.6 and 10.4 Hz, 1H), 3.32 (dd,  $J$  = 13.6 and 2.8 Hz, 1H), 5.51 (dd,  $J$  = 11.2 and 0.4 Hz, 1H), 5.56-5.64 (m, 1H), 5.69-5.74 (m, 1H), 5.85-5.98 (m, 1H), 7.20-7.22 (m, 3H), 7.40-7.44 (m, 2H), 7.49-7.59 (m, 3H), 7.95-7.97 (m, 2H);  $^{13}\text{C}$  NMR (125 MHz,  $\text{CDCl}_3$ )  $\delta$  25.7 (t,  $J_{\text{C,F}}$  = 35.9 Hz), 72.8 (dd,  $J_{\text{C,F}}$  = 33.5 and 30.0 Hz), 118.3 (dd,  $J_{\text{C,F}}$  = 247.8 and 244.1 Hz), 122.1 (t,  $J_{\text{C,F}}$  = 9.6 Hz), 127.6, 128.4, 129.0, 129.1, 129.2, 129.5 (t,  $J_{\text{C,F}}$  = 25.1 Hz), 129.9, 133.4, 133.6, 165.1. HRFAB-MS ( $m/z$ ) 382.0287 ( $\text{M}^+\text{+H}$ ) calcd for  $\text{C}_{18}\text{H}_{16}\text{F}_2\text{O}_2\text{Se}$  ( $\text{M}^+\text{+H}$ ) 382.0284.

### 10. Radical reaction of **5e**

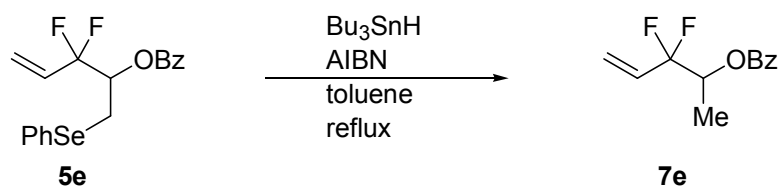

Compound **5e** (529 mg, 1.39 mmol) was treated by the procedure described for the reaction of **5a**. Column chromatography on silica gel (hexane/ $\text{Et}_2\text{O}$  = 20/1) gave **7e** (227 mg, 72%) as an oil.

**Physical data for 7e**  $^1\text{H}$  NMR (400 MHz,  $\text{CDCl}_3$ )  $\delta$  1.44 (d,  $J$  = 6.4 Hz, 3H), 5.36-5.44 (m, 1H), 5.56 (d,  $J$  = 11.2 Hz, 1H), 5.77 (dt,  $J$  = 17.2 and 2.4 Hz, 1H), 5.93-6.06 (m, 1H), 7.44-7.48 (m, 2H), 7.57-7.61 (m, 1H), 8.03-8.06 (m, 2H);  $^{13}\text{C}$  NMR (125 MHz,  $\text{CDCl}_3$ )  $\delta$  13.7, 70.6 (t,  $J_{\text{C,F}}$  = 31.1 Hz), 118.7 (dd,  $J_{\text{C,F}}$  = 245.3 and 242.9 Hz), 121.6 (t,  $J_{\text{C,F}}$  = 9.6 Hz), 128.4, 129.8 (t,  $J_{\text{C,F}}$  = 21.6 Hz), 129.8, 130.0, 165.2. HRFAB-MS ( $m/z$ ) 226.0820 ( $\text{M}^+\text{+H}$ ) calcd for  $\text{C}_{12}\text{H}_{12}\text{F}_2\text{O}_2$  ( $\text{M}^+\text{+H}$ ) 226.0805.

### 11. Preparation of **5f**

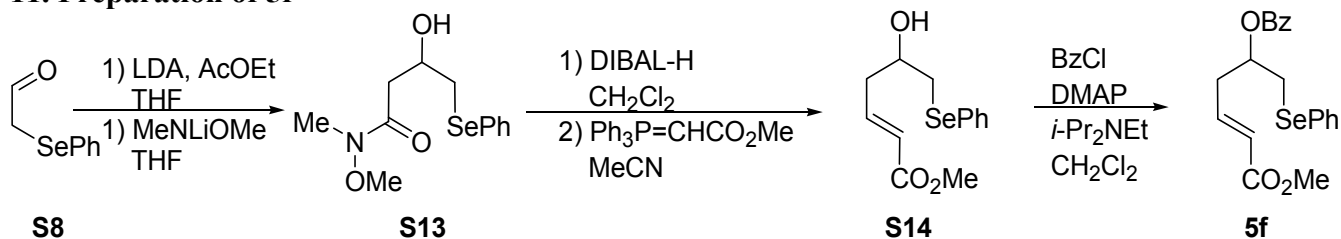

#### 3-Hydroxy-N-methoxy-N-methyl-4-(phenylseleno)butyramide (**S13**)

To a THF (25 mL) solution of diisopropylamine (2.11 mL, 15.1 mmol) was dropwise added BuLi (2.66 mol/L in hexane, 5.7 mL, 15.1 mmol) at  $-80\text{ }^{\circ}\text{C}$ . The resulting mixture was further stirred for 10 min at same temperature then 10 min at rt. To the mixture was dropwise added AcOEt (1.48 mL, 15.1 mmol) at  $-80\text{ }^{\circ}\text{C}$  then stirred further 1 h at same temperature. To the resulting lithium enolate solution was

dropwise added **S8** (1.5 g, 7.53 mmol) in THF (20 mL) over 3 min. The mixture was stirred at  $-80\text{ }^{\circ}\text{C}$  for 30 min. The mixture was partitioned between aq. saturated  $\text{NH}_4\text{Cl}$  and AcOEt. Evaporation of the organic layer gave a crude ester (*ca.* 2.12 g) which was used for next step without further purification. To a stirred suspension of *N,O*-dimethylhydroxylamine hydrochloride (2.13 g, 21.8 mmol) in THF (40 mL) was dropwise added BuLi (2.66 mol/L in hexane, 16.4 mL, 43.7 mmol) at  $-40\text{ }^{\circ}\text{C}$ . The mixture was stirred at rt for 10 min. To the resulting lithium amide solution was added above ester in THF (15 mL) at  $-40\text{ }^{\circ}\text{C}$  then stirred for 1 h at same temperature. The mixture was partitioned between aq. saturated  $\text{NH}_4\text{Cl}$  and AcOEt. Column chromatography on silica gel (hexane/AcOEt = 1/4) gave **S13** (1.29 g, 57% for two steps) as an oil:  $^1\text{H}$  NMR (400 MHz,  $\text{CDCl}_3$ )  $\delta$  2.61-2.67 (m, 1H), 2.81-2.84 (m, 1H), 3.08 (dd,  $J = 12.8$  and  $6.4$  Hz, 1H), 3.13 (dd,  $J = 12.8$  and  $6.4$  Hz, 1H), 3.17 (s, 3H), 3.65 (s, 3H), 3.97 (br-d, 1H), 4.19-4.21 (m, 1H), 7.24-7.29 (m, 3H), 7.52-7.55 (m, 2H);  $^{13}\text{C}$  NMR (125 MHz,  $\text{CDCl}_3$ )  $\delta$  31.7, 34.1, 37.1, 61.1, 67.4, 126.9, 129.0, 129.7, 132.5, 172.9. HRFAB-MS ( $m/z$ ) 304.0438 ( $M^++\text{H}$ ) calcd for  $\text{C}_{12}\text{H}_{18}\text{NO}_3\text{Se}$  ( $M^++\text{H}$ ) 304.0452.

### 5-Hydroxy-6-(phenylseleno)-hex-2-enoic acid methyl ester (**S14**)

To a  $\text{CH}_2\text{Cl}_2$  (30 mL) solution of **S13** (1.27 g, 4.2 mmol) was dropwise added DIBAL-H (0.99 mol/L in toluene, 9.3 mL, 9.2 mmol) at  $-80\text{ }^{\circ}\text{C}$ . After 30 min stirring at same temperature, further DIBAL-H (4.23 mL, 4.2 mmol) then stirred for 1 h. The mixture was partitioned between aq. saturated  $\text{NH}_4\text{Cl}$  and  $\text{CH}_2\text{Cl}_2$ . Evaporation of the organic layer gave a crude aldehyde. This was dissolved in MeCN (40 mL) then treated with  $\text{Ph}_3\text{P}=\text{CHCO}_2\text{Me}$  (3.09 g, 9.24 mmol). The resulting suspension was stirred at rt for 24h. After evaporation of all of volatiles, the residue was purified by column chromatography on silica gel (hexane/AcOEt = 2/1). This gave **S14** (507 mg, 40% for two steps) as an oil:  $^1\text{H}$  NMR (400 MHz,  $\text{CDCl}_3$ )  $\delta$  2.40-2.53 (m, 3H), 2.91 (dd,  $J = 13.2$  and  $8.8$  Hz, 1H), 3.12 (dd,  $J = 13.2$  and  $4.0$  Hz, 1H), 3.72 (s, 3H), 3.78-3.84 (m, 1H), 5.88 (dt,  $J = 15.6$  and  $1.2$  Hz, 1H), 6.94 (dt,  $J = 15.6$  and  $7.5$  Hz, 1H), 7.27-7.30 (m, 3H), 7.51-7.56 (m, 2H);  $^{13}\text{C}$  NMR (125 MHz,  $\text{CDCl}_3$ )  $\delta$  36.5, 39.0, 51.5, 68.6, 123.7, 127.6, 128.7, 129.3, 133.3, 144.5, 166.6. HRFAB-MS ( $m/z$ ) 300.0288 ( $M^++\text{H}$ ) calcd for  $\text{C}_{13}\text{H}_{16}\text{O}_3\text{Se}$  ( $M^++\text{H}$ ) 300.0265.

### Benzoic acid 4-methoxycarbonyl-1-(phenylselenomethyl)-but-3-enyl ester (**5f**)

To a mixture of **S14** (500 mg, 1.67 mmol), DMAP (410 mg, 3.34 mmol) and *i*- $\text{Pr}_2\text{NEt}$  (580  $\mu\text{L}$ , 3.34 mmol) in  $\text{CH}_2\text{Cl}_2$  (17 mL) was added BzCl (254  $\mu\text{L}$ , 2.17 mmol) at  $0\text{ }^{\circ}\text{C}$ . After 30 min stirring of the resulting mixture at rt, this was partitioned between aq. saturated  $\text{NaHCO}_3$  and  $\text{CH}_2\text{Cl}_2$ . Column chromatography on silica gel (hexane/ $\text{Et}_2\text{O}$  = 3/1) gave **5f** (575 mg, 85%) as a solid:  $^1\text{H}$  NMR (400 MHz,  $\text{CDCl}_3$ )  $\delta$  2.73-2.83 (m, 1H), 3.15 (dd,  $J = 12.8$  and  $6.4$  Hz, 1H), 3.27 (dd,  $J = 12.8$  and  $6.0$  Hz, 1H), 3.71 (s, 3H), 5.31-5.38 (m, 1H), 5.89 (dd,  $J = 15.6$  and  $0.8$  Hz, 1H), 6.92 (dt,  $J = 15.6$  and  $7.2$  Hz, 1H), 7.20-7.26 (m, 3H), 7.39-7.45 (m, 2H), 7.53-7.57 (m, 3H), 7.92-7.94 (m, 2H);  $^{13}\text{C}$  NMR (125 MHz,  $\text{CDCl}_3$ )  $\delta$  30.6, 36.1, 51.5, 72.4, 124.4, 127.4, 128.3, 129.2, 129.7, 129.8, 133.0, 133.1, 145.0, 165.7, 166.4. HRFAB-MS ( $m/z$ ) 404.0514 ( $M^++\text{H}$ ) calcd for  $\text{C}_{20}\text{H}_{20}\text{O}_4\text{Se}$  ( $M^++\text{H}$ ) 404.0527.

## 12. Radical reaction of **5f**

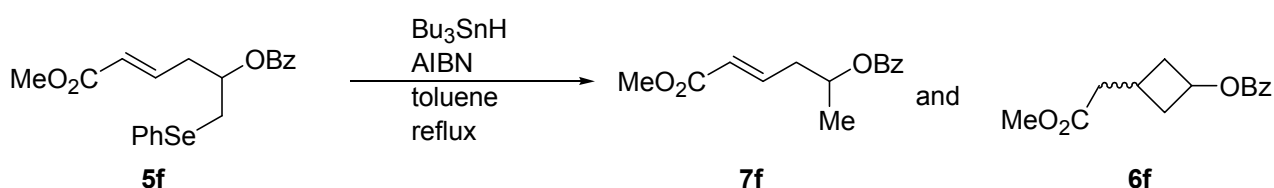

Compound **5f** (403 mg, 1.0 mmol) was treated by the procedure described for the reaction of **5a**. Column chromatography on silica gel (hexane/ $\text{Et}_2\text{O}$  = 3/1) gave **7f** and **6f** [206 mg, 83%, *ca.* 1:0.20:0.16 (**7f**, 61%, **6f**, 22% respectively), calculated by integration of  $^1\text{H}$  NMR] as an inseparable mixture.

**Physical data for a mixture of 7f and 6f:**  $^1\text{H}$  NMR (400 MHz,  $\text{CDCl}_3$ )  $\delta$  1.39 (d,  $J = 6.4$  Hz, 3H), 1.88-1.92 (m, 0.47H), 2.26-2.82 (m, 3.6H), 3.67 (s, 0.6H), 3.68 (s, 0.3H), 3.72 (s, 3H), 5.08-5.15 (m, 0.2H), 5.24-5.35 (m, 1.16H), 5.94 (d,  $J = 15.6$  Hz, 1H), 6.98 (dt,  $J = 15.6$  and 7.2 Hz, 1H), 7.42-7.46 (m, 2.86H), 7.54-7.58 (m, 1.6H), 8.02-8.06 (m, 2.84H);  $^{13}\text{C}$  NMR for **7f** (125 MHz,  $\text{CDCl}_3$ )  $\delta$  19.7, 38.5, 51.5, 69.7, 123.9, 128.3, 129.5, 130.3, 132.9, 143.7, 165.6, 166.5. Partial  $^{13}\text{C}$  NMR for **6f** (125 MHz,  $\text{CDCl}_3$ )  $\delta$  23.8, 25.6, 34.7, 36.3, 39.9, 40.8, 66.0, 68.8, 172.6, 172.8. FAB-MS ( $m/z$ ) 249 ( $\text{M}^+\text{H}$ ).

### 13. Preparatio of radical precursor 13

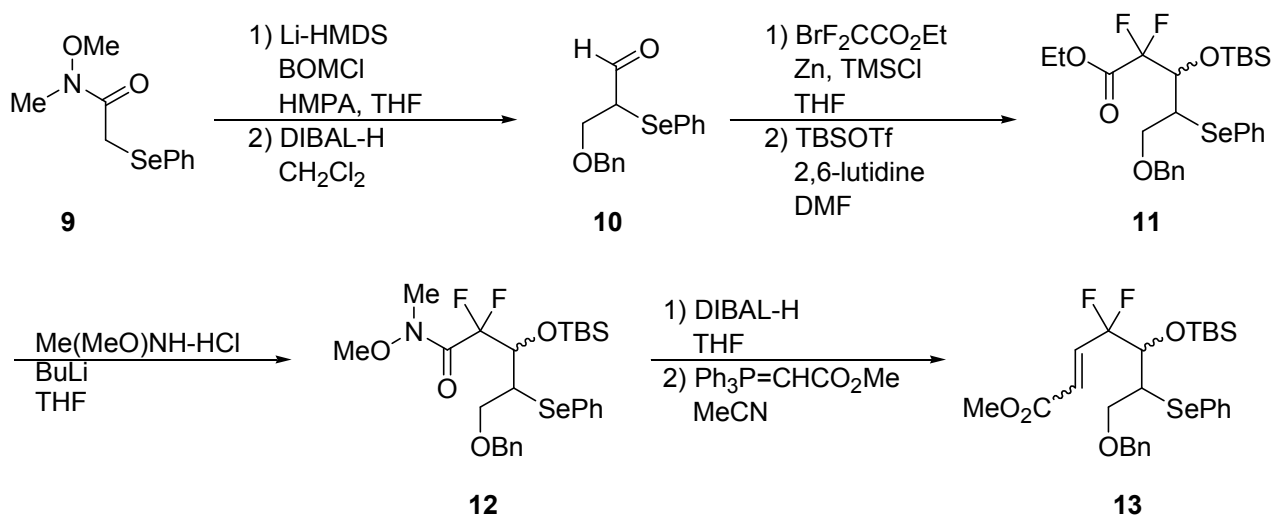

#### 3-Benzyloxy-2-phenylselenenylpropionaldehyde (**10**)

To a THF (160 mL) solution of **9**<sup>4,5</sup> (13.66 g, 52.9 mmol) was dropwise added Li-HMDS (1.0 mol/L in THF, 58.2 mL, 58.2 mmol) at  $-80$  °C over 10 min. The resulting mixture was stirred further 30 min at same temperature. To this was sequentially added freshly distilled BOMCl (8.35 mL, 60.84 mmol) and HMPA (18.4 mL, 105.8 mmol). The mixture was slowly warmed to  $-55$  °C then stirred further 20 h at same temperature. The mixture was partitioned between aq. saturated  $\text{NaHCO}_3$  and AcOEt then dried by  $\text{Na}_2\text{SO}_4$ . After evaporation of all of volatiles of the organic layer, the residue was roughly purified by column chromatography on neutral silica gel (hexane/ $\text{Et}_2\text{O} = 6/4$ ). This gave crude benzyl ether (14.08 g) as an oil. This benzyl ether was used for the next step without further purification. To a THF (90 mL) solution of above residue was dropwise added DIBAL-H (1.0 mol/L in toluene, 63.5 mL, 63.5 mmol) at  $-80$  °C over 10 min. The resulting mixture was stirred further 45 min at same temperature. Then, the mixture was treated with aq. saturated Rochelle salt (*ca.* 100 mL) and stirred at rt for 1 h. The resulting mixture was partitioned between brine and  $\text{Et}_2\text{O}$ . Column chromatography on neutral silica gel (hexane/ $\text{Et}_2\text{O} = 3/1$ ) of the organic layer gave an unstable aldehyde **10** (7.9 g, 47% for two steps) as a yellowish oil:  $^1\text{H}$  NMR (400 MHz,  $\text{CD}_2\text{Cl}_2$ )  $\delta$  3.81-3.89 (m, 3H), 4.53 (s, 2H), 7.28-7.55 (m, 10H), 9.49 (d,  $J = 3.2$  Hz, 1H);  $^{13}\text{C}$  NMR (125 MHz,  $\text{CD}_2\text{Cl}_2$ )  $\delta$  51.4, 67.5, 73.7, 126.0, 128.1, 128.7, 129.3, 129.7 (2C), 136.3, 138.2, 192.9. HRFAB-MS ( $m/z$ ) 321.0384 ( $\text{M}^+\text{H}$ ) calcd for  $\text{C}_{16}\text{H}_{17}\text{O}_2\text{Se}$  ( $\text{M}^+\text{H}$ ) 321.0394.

**5-Benzyloxy-3-(tert-butyl(dimethyl)silyloxy)-2,2-difluoro-4-phenylselenenyl-pentanoic acid ethyl ester (**11**)** To a THF (10 mL) suspension of activated zinc (2.52 g) was added TMSCl (342  $\mu\text{L}$ , 2.7 mmol). The resulting mixture was heated at 60 °C. After 15 min stirring of the resulting mixture, THF (50 mL) and  $\text{BrF}_2\text{CCO}_2\text{Et}$  (4.93 mL, 38.5 mmol) were sequentially added, then heated at 60 °C for 5 min. The resulting THF solution which include zinc enolate was quickly transferred *via* cannula to a THF (50 mL) solution of **10** (6.14 g, 19.23 mmol) which was cooled at 0 °C. The resulting mixture was stirred at rt for 2 h. The mixture was partitioned between 0.5 N HCl and AcOEt. Column chromatography (hexane/AcOEt = 3:1) of the organic layer gave a clude alcohol (7.29 g) as an oil. This

was used for the next step without further purification. The crude alcohol was dissolved in DMF (70 mL). This was treated with 2,6-lutidine (7.25 mL, 65.6 mmol) and TBSOTf (7.53 mL, 32.8 mmol). The resulting mixture was stirred at rt for 4 days. This was partitioned between aq. saturated NaHCO<sub>3</sub> and AcOEt, then 0.5 N HCl and AcOEt. Column chromatography on neutral silica gel (hexane/Et<sub>2</sub>O = 11/1) of the organic layer gave **11** (8.23 g, 77% for two steps) as a diastereomixture (*ca.* 5:1). Analytical samples were prepared by preparative TLC (hexane/AcOEt = 40/1, 4 times evolution). This gave *major-11* (slow moving) and *minor-11* (fast moving) each as an oil.

**Physical data for *major-11*:** <sup>1</sup>H NMR (400 MHz, CDCl<sub>3</sub>) δ 0.07 (s, 3H), 0.13 (s, 3H), 0.89 (s, 9H), 1.25 (dt, *J* = 7.6 and 0.4 Hz, 3H), 3.63-3.70 (m, 2H), 3.95 (dd, *J* = 9.6 and 6.8 Hz, 1H), 4.19 (q, 7.6 Hz, 2H), 4.47-4.60 (m, 3H), 7.23-7.35 (m, 8H), 7.54-7.57 (m, 2H); <sup>13</sup>C NMR (125 MHz, CDCl<sub>3</sub>) δ -5.3, -4.7, 13.8, 18.4, 25.7, 45.6, 63.0, 70.3, 71.6 (t, *J*<sub>C,F</sub> = 29.9 Hz), 72.3, 77.2, 114.2 (t, *J*<sub>C,F</sub> = 256.1 Hz), 127.6, 127.7, 127.8, 128.4, 129.1, 134.1, 137.7, 163.3 (t, *J*<sub>C,F</sub> = 32.3 Hz); <sup>19</sup>F NMR (470 MHz, CDCl<sub>3</sub>) δ -111.5 (m). HRFAB-MS (*m/z*) 558.1531 (M<sup>+</sup>+H) calcd for C<sub>26</sub>H<sub>36</sub>F<sub>2</sub>O<sub>4</sub>SiSe (M<sup>+</sup>+H) 558.1516.

**Physical data for *minor-11*:** <sup>1</sup>H NMR (400 MHz, CDCl<sub>3</sub>) δ 0.08 (s, 3H), 0.15 (s, 3H), 0.93 (s, 9H), 1.31 (t, *J* = 7.6 Hz, 3H), 3.49-3.56 (m, 2H), 3.77 (t, *J* = 10.0 Hz, 1H), 4.22-4.40 (m, 3H), 4.49 (d, *J* = 12.0 Hz, 1H), 4.56 (t, *J* = 9.2 Hz, 1H), 7.22-7.36 (m, 8H), 7.53-7.57 (m, 2H); <sup>13</sup>C NMR (125 MHz, CDCl<sub>3</sub>) δ -5.3, -4.7, 13.8, 18.4, 25.7, 45.6, 63.0, 70.3, 71.6 (t, *J*<sub>C,F</sub> = 29.9 Hz), 72.3, 77.2, 114.2 (t, *J*<sub>C,F</sub> = 256.1 Hz), 127.6, 127.7, 127.8, 128.4, 129.1, 134.2, 137.7, 163.3 (t, *J*<sub>C,F</sub> = 32.4 Hz); <sup>19</sup>F NMR (470 MHz, CDCl<sub>3</sub>) δ -111.1 (d, *J* = 263.4 Hz), -114.8 (d, *J* = 263.4 Hz). HRFAB-MS (*m/z*) 558.1531 (M<sup>+</sup>+H) calcd for C<sub>26</sub>H<sub>36</sub>F<sub>2</sub>O<sub>4</sub>SiSe (M<sup>+</sup>+H) 558.1516.

**5-Benzyloxy-3-(*tert*-butyldimethylsilyloxy)-2,2-difluoro-4-phenylselenenyl-pentanoic acid methoxymethyl amide (**12**)** To a THF (80 mL) suspension of *N*, *O*-dimethylhydroxylamine hydrochloride (4.05 g, 41.57 mmol, previously dried by P<sub>2</sub>O<sub>5</sub> under vacuum condition for 2 days) was dropwise added BuLi (2.64 mol/L in hexane, 31.5 mL, 83.2 mmol) at -80 °C. After 5 min stirring, this was allowed to rt for 10 min. The resulting mixture was cooled at -80 °C, then added a THF (50 mL) solution of **11** (7.73 g, 13.86 mmol, *ca.* 5:1 mixture of two stereoisomers) *via* cannula. The mixture was stirred at same temperature for 24 h. Then the mixture was partitioned between aq. saturated NH<sub>4</sub>Cl and AcOEt. Column chromatography on neutral silica gel (hexane/AcOEt = 2/1) of the organic layer gave **12** (7.14 g, 90% as a 5:1 of diastereomeric mixture). Analytical samples were prepared by preparative TLC (hexane/AcOEt = 8/1, five times evolution). This gave *major-12* (slow moving) and *minor-12* (fast moving) each as an oil

**Physical data for *major-12*:** <sup>1</sup>H NMR (400 MHz, CDCl<sub>3</sub>) δ -0.08 (s, 3H), 0.00 (s, 3H), 0.76 (s, 9H), 2.98 (s, 3H), 3.39 (s, 3H), 3.52-3.59 (m, 2H), 3.88-3.89 (m, 1H), 4.36 (d, *J* = 15.2 Hz, 1H), 4.43 (d, *J* = 15.2 Hz, 1H), 4.56-4.63 (m, 1H), 7.10-7.29 (m, 8H), 7.44-7.46 (m, 2H); <sup>13</sup>C NMR (125 MHz, CDCl<sub>3</sub>) δ -5.0, -4.3, 18.4, 25.8, 33.1, 45.5, 61.7, 68.9, 72.9, 74.1 (t, *J*<sub>C,F</sub> = 22.7 Hz), 116.3 (t, *J*<sub>C,F</sub> = 256.4 Hz), 127.4, 127.6, 127.7, 128.2, 129.1, 129.6, 134.8, 138.2, 162.9 (t, *J*<sub>C,F</sub> = 28.6 Hz); <sup>19</sup>F NMR (470 MHz, CDCl<sub>3</sub>) δ -108.4 (d, *J* = 254.3 Hz), -114.1 (d, *J* = 254.3 Hz). HRFAB-MS (*m/z*) 574.1683 (M<sup>+</sup>+H) calcd for C<sub>26</sub>H<sub>38</sub>F<sub>2</sub>NO<sub>4</sub>SiSe (M<sup>+</sup>+H) 574.1703.

**Physical data for *minor-12*:** <sup>1</sup>H NMR (400 MHz, CDCl<sub>3</sub>) δ -0.04 (s, 3H), 0.00 (s, 3H), 0.83 (s, 9H), 3.09 (br-s, 3H), 3.42-3.45 (m, 2H), 3.61 (s, 3H), 3.68-3.73 (m, 1H), 4.24 (d, *J* = 12.0 Hz, 1H), 3.70 (d, *J* = 12.0 Hz, 1H), 4.74 (dd, *J* = 15.2 and 9.6 Hz, 1H), 7.12-7.25 (m, 8H), 7.48-7.50 (m, 2H); <sup>13</sup>C NMR (125 MHz, CDCl<sub>3</sub>) δ -5.2, -4.6, 18.4, 28.8, 33.4, 45.5, 61.8, 70.5, 70.5 (t, *J*<sub>C,F</sub> = 28.6 Hz), 72.2, 116.3 (t, *J*<sub>C,F</sub> = 254.0 Hz), 127.4, 127.5, 127.6, 127.7, 128.2, 129.0, 134.5, 138.9, 162.9 (t, *J*<sub>C,F</sub> = 28.6 Hz); <sup>19</sup>F NMR (470 MHz, CDCl<sub>3</sub>) δ -110.6 (d, *J* = 254.3 Hz), -114.4 (d, *J* = 254.3 Hz). HRFAB-MS (*m/z*) 574.1683 (M<sup>+</sup>+H) calcd for C<sub>26</sub>H<sub>38</sub>F<sub>2</sub>NO<sub>4</sub>SiSe (M<sup>+</sup>+H) 574.1703.

**7-Benzyloxy-5-(*tert*-butyldimethylsilyloxy)-4,4-difluoro-6-phenylselenenyl-hept-2-enoic acid methyl ester (**13**)** To a stirred solution of **12** (7.0 g, 12.2 mmol, *ca.* 5:1 mixture of two stereoisomers) in THF (100 mL) was dropwise added DIBAL-H (1.0 mol/L in toluene, 36.7 mL, 36.7 mmol) at -80 °C.



The resulting mixture was stirred for 15 min at rt. The mixture was partitioned between 0.5 N HCl and AcOEt. The organic layer was dried by Na<sub>2</sub>SO<sub>4</sub>, then filtrated through a celite pad. The filtrate was evaporated. The crude aldehyde was dissolved in MeCN (100 mL), then treated with Ph<sub>3</sub>P=CHCO<sub>2</sub>Me (12.26 g, 36.7 mmol). The resulting mixture was stirred at rt for 14 h. This was partitioned between brine and AcOEt. Column chromatography on silica gel (hexane/Et<sub>2</sub>O = 4/1) of the organic layer gave **13** (6.45 g, 93% for two steps as a diastereomixture, *major-(E)-13*:*(Z)-13*:*minor-(E)-13* = 1.0:0.14:0.22 calculated by integration of <sup>1</sup>H NMR). Analytical samples were prepared by preparative TLC (hexane/AcOEt = 50/1, seven times evolution). This gave *major-(E)-13*, *(Z)-13* and *minor-(E)-13* respectively each as an oil.

**Physical data for *major-(E)-13***: <sup>1</sup>H NMR (400 MHz, CDCl<sub>3</sub>) δ 0.07 (s, 3H), 0.13 (s, 3H), 0.90 (s, 9H), 3.59-3.67 (m, 2H), 3.75 (s, 3H), 3.89 (dd, *J* = 10.0 and 5.6 Hz, 1H), 4.34 (ddd, *J* = 12.8, 7.2 and 1.6 Hz, 1H), 4.46 (d, *J* = 12.0 Hz, 1H), 4.50 (d, *J* = 12.0 Hz, 1H), 6.23 (dt, *J* = 16.0 and 1.6 Hz, 1H), 6.89 (ddd, *J* = 16.0, 13.6 and 11.2 Hz, 1H), 7.24-7.34 (m, 8H), 7.52-7.54 (m, 2H); <sup>13</sup>C NMR (125 MHz, CDCl<sub>3</sub>) δ -4.8, -4.7, 18.3, 25.8, 45.4 (d, *J*<sub>C,F</sub> = 3.6 Hz), 52.1, 69.2, 73.0, 76.4 (t, *J*<sub>C,F</sub> = 29.8 Hz), 119.3 (t, *J*<sub>C,F</sub> = 245.6 Hz), 125.6 (t, *J*<sub>C,F</sub> = 8.4 Hz), 127.6, 127.6, 127.7, 128.3, 129.2, 129.7, 134.2, 137.3 (t, *J*<sub>C,F</sub> = 25.1 Hz), 137.9, 165.3; <sup>19</sup>F NMR (470 MHz, CDCl<sub>3</sub>) δ -101.3 (d, *J* = 254.3 Hz), -107.4 (d, *J* = 254.3 Hz). HRFAB-MS (*m/z*) 570.1523 (M<sup>+</sup>+H) calcd for C<sub>27</sub>H<sub>36</sub>F<sub>2</sub>O<sub>4</sub>SiSe (M<sup>+</sup>+H) 570.1516.

**Physical data for *(Z)-13***: <sup>1</sup>H NMR (400 MHz, CDCl<sub>3</sub>) δ 0.09 (s, 3H), 0.17 (s, 3H), 0.91 (s, 9H), 3.62-3.72 (m, 2H), 3.66 (s, 3H), 4.02 (dd, *J* = 10.0 and 6.0 Hz, 1H), 4.48 (d, *J* = 12.0 Hz, 1H), 4.52 (d, *J* = 12.0 Hz, 1H), 4.66-4.72 (m, 1H), 5.97 (d, *J* = 12.4 Hz, 1H), 6.02 (dt, *J* = 24.8 and 12.4 Hz, 1H), 7.23-7.32 (m, 8H), 7.53-7.56 (m, 2H); <sup>13</sup>C NMR (125 MHz, CDCl<sub>3</sub>) δ -4.7, -4.6, 18.4, 25.9, 46.4, 52.0, 69.2, 73.0, 76.4 (t, *J*<sub>C,F</sub> = 26.3 Hz), 119.6 (t, *J*<sub>C,F</sub> = 247.8 Hz), 125.9 (t, *J*<sub>C,F</sub> = 6.0 Hz), 127.5, 127.6, 127.8, 128.3, 129.1, 130.0, 133.7 (t, *J*<sub>C,F</sub> = 27.5 Hz), 134.1, 138.1, 165.0; <sup>19</sup>F NMR (470 MHz, CDCl<sub>3</sub>) δ -100.5 (d, *J* = 245.2 Hz), -101.7 (dd, *J* = 245.2 and 18.2 Hz). HRFAB-MS (*m/z*) 570.1485 (M<sup>+</sup>+H) calcd for C<sub>27</sub>H<sub>36</sub>F<sub>2</sub>O<sub>4</sub>SiSe (M<sup>+</sup>+H) 570.1516.

**Physical data for *minor-(E)-13***: <sup>1</sup>H NMR (400 MHz, CDCl<sub>3</sub>) δ 0.09 (s, 3H), 0.12 (s, 3H), 0.92 (s, 9H), 3.35-3.38 (m, 1H), 3.62 (ddd, *J* = 10.0, 4.8 and 1.6 Hz, 1H), 3.76-3.81 (m, 1H), 3.78 (s, 3H), 4.42 (d, *J* = 12.0 Hz, 1H), 4.50 (d, *J* = 12.0 Hz, 1H), 4.56 (dd, *J* = 12.4 and 4.4 Hz, 1H), 6.26 (dt, *J* = 16.0 and 1.6 Hz, 1H), 7.16-7.35 (m, 9H), 7.39-7.41 (m, 2H); <sup>13</sup>C NMR (125 MHz, CDCl<sub>3</sub>) δ -5.3, -4.5, 18.3, 25.8, 29.7, 45.9 (d, *J*<sub>C,F</sub> = 6.0 Hz), 52.0, 70.6, 72.5, 73.0 (dd, *J*<sub>C,F</sub> = 34.6 and 28.6 Hz), 119.6 (t, *J*<sub>C,F</sub> = 243.2 Hz), 124.1 (t, *J*<sub>C,F</sub> = 8.3 Hz), 127.4, 127.8, 127.8, 128.4, 129.1, 129.7, 133.4, 137.4 (t, *J*<sub>C,F</sub> = 23.9 Hz), 137.6, 165.6; <sup>19</sup>F NMR (470 MHz, CDCl<sub>3</sub>) δ -99.4 (d, *J* = 254.3 Hz), -108.8 (d, *J* = 254.3 Hz). HRFAB-MS (*m/z*) 570.1568 (M<sup>+</sup>+H) calcd for C<sub>27</sub>H<sub>36</sub>F<sub>2</sub>O<sub>4</sub>SiSe (M<sup>+</sup>+H) 570.1516.

---

4) Shen, Z.; Khan, H. A.; Dong, V. M. *J. Am. Chem. Soc.* **2008**, *130*, 2916.

5) Barluenga, S.; Moulin, E.; Lopez, P.; Winssinger, N. *Chem. Eur. J.* **2005**, *11*, 4935.



**14-1. Radical cyclization of 13: Transformation to [4-Benzyloxymethyl-3-(tert-butyldimethylsiloxy)-2,2-difluorocyclobutyl]-acetic acid methyl ester (14) (Table 2, entry 5)**

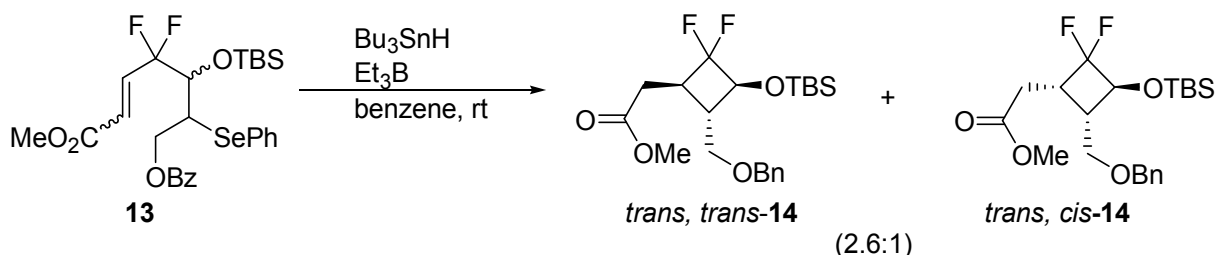

To a benzene (230 mL) solution of **13** (6.52 g, 11.45 mmol, 1.0:0.14:0.22 of diastereomeric mixture) and freshly opened Et<sub>3</sub>B (1.0 mol/L in THF, 5.73 mL, 5.73 mmol) was dropwise added Bu<sub>3</sub>SnH (6.16 mL, 22.9 mmol) over 24h using motor driven syringe at rt. When half volume of Bu<sub>3</sub>SnH was transferred to the reaction mixture (*ca.* 12h), further Et<sub>3</sub>B (5.73 mL, 5.73 mmol) was added then continued to stir further 12h at rt. After evaporation of all of volatiles, the residue was purified by column chromatography on silica gel (hexane/Et<sub>2</sub>O = 4/1). This gave **14** (3.71 g, 78% , oil) as a diastereomeric mixture (*trans,trans-14/trans,cis-14* = *ca.* 2.6:1 based on the integration of <sup>1</sup>H NMR): <sup>1</sup>H NMR (500 MHz, CDCl<sub>3</sub>) δ 0.06 (s, 1.16H), 0.07 (s, 3H), 0.08 (s, 1.16H), 0.09 (s, 3H), 0.88 (s, 3.47H), 0.89 (s, 9H), 1.86-1.90 (m, 1H), 2.39-2.49 (m, 0.39H), 2.48-2.70 (m, 3.77H), 3.13-3.21 (m, 0.39H), 3.53-3.62 (m, 2.77H), 3.63 (s, 1.16H), 3.64 (s, 3H), 4.22-4.28 (m, 1H), 4.31-4.36 (m, 0.39H), 4.43 (d, *J* = 12.1 Hz, 0.39H), 4.48 (d, *J* = 12.1 Hz, 0.39H), 4.51 (d, *J* = 12.0 Hz, 1H), 4.54 (d, *J* = 12.0 Hz, 1H), 7.27-7.36 (m, 6.95H); <sup>13</sup>C NMR (125 MHz, CDCl<sub>3</sub>) for *trans, trans-14* δ -5.2, -5.1, 18.1, 25.6, 31.4 (d, *J*<sub>C,F</sub> = 6.0 Hz), 37.1, (dd, *J*<sub>C,F</sub> = 19.6 and 19.2 Hz), 42.7 (d, *J*<sub>C,F</sub> = 21.6 Hz), 51.8, 68.0 (d, *J*<sub>C,F</sub> = 2.4 Hz), 71.8 (dd, *J*<sub>C,F</sub> = 25.2 and 18.0 Hz), 73.3, 119.9 (dd, *J*<sub>C,F</sub> = 297.5 and 177.1 Hz), 127.5, 127.6, 128.4, 138.1, 171.8. <sup>13</sup>C NMR (125 MHz, CDCl<sub>3</sub>) for *trans, cis-14* δ -5.5, 18.2, 25.6, 29.6, 39.0 (d, *J*<sub>C,F</sub> = 15.5 Hz), 39.2 (t, *J*<sub>C,F</sub> = 21.5 Hz), 51.6, 66.9 (d, *J*<sub>C,F</sub> = 2.4 Hz), 72.8 (dd, *J*<sub>C,F</sub> = 26.4 and 20.4 Hz), 73.3, 120.0 (dd, *J*<sub>C,F</sub> = 293.9 and 282.0 Hz), 127.2, 127.8, 128.3, 137.8, 172.1; <sup>19</sup>F NMR (470 MHz, CDCl<sub>3</sub>) for *trans-14* δ -91.8 (d, *J* = 190.7 Hz), -136.2 (d, *J* = 190.7 Hz). <sup>19</sup>F NMR (470 MHz, CDCl<sub>3</sub>) for *cis-14* δ -103.7 (d, *J* = 199.8 Hz), -117.4 (d, *J* = 199.8 Hz). HRFAB-MS (*m/z*) 415.2130 (M<sup>+</sup>+H) calcd for C<sub>21</sub>H<sub>33</sub>F<sub>2</sub>O<sub>4</sub>Si (M<sup>+</sup>+H) 415.2116.

**NOE experiments of 14:** The NOE experiments were carried out as a mixture of two diastereomers.

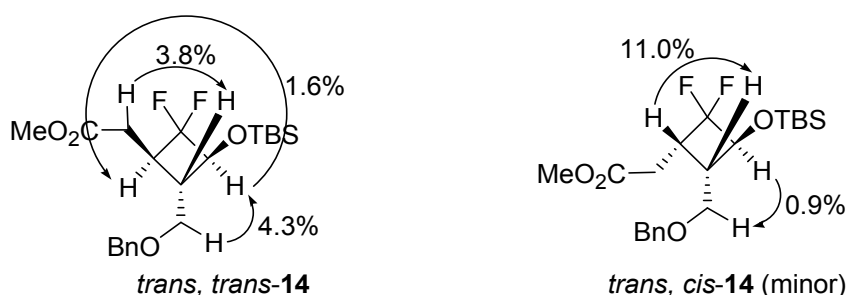

**14-2. Radical reaction of major-(E)-13**

Compound *major-(E)-13* (219 mg, 0.38 mmol) was treated with a same procedure described for **13**. This gave a mixture of **14** (112 mg, 71%, *trans-14/cis-14* = *ca.* 2.6:1 based on the integration of <sup>1</sup>H NMR).

**14-3. Radical reaction of (Z)-13**

Compound (*Z*)-**13** (106 mg, 0.19 mmol) was treated with a same procedure described for **13**. This gave a mixture of **14** (49 mg, 64%, *trans,trans-14/trans,cis-14* = *ca.* 1:1 based on the integration of <sup>1</sup>H NMR).

## 15. Synthesis of 4

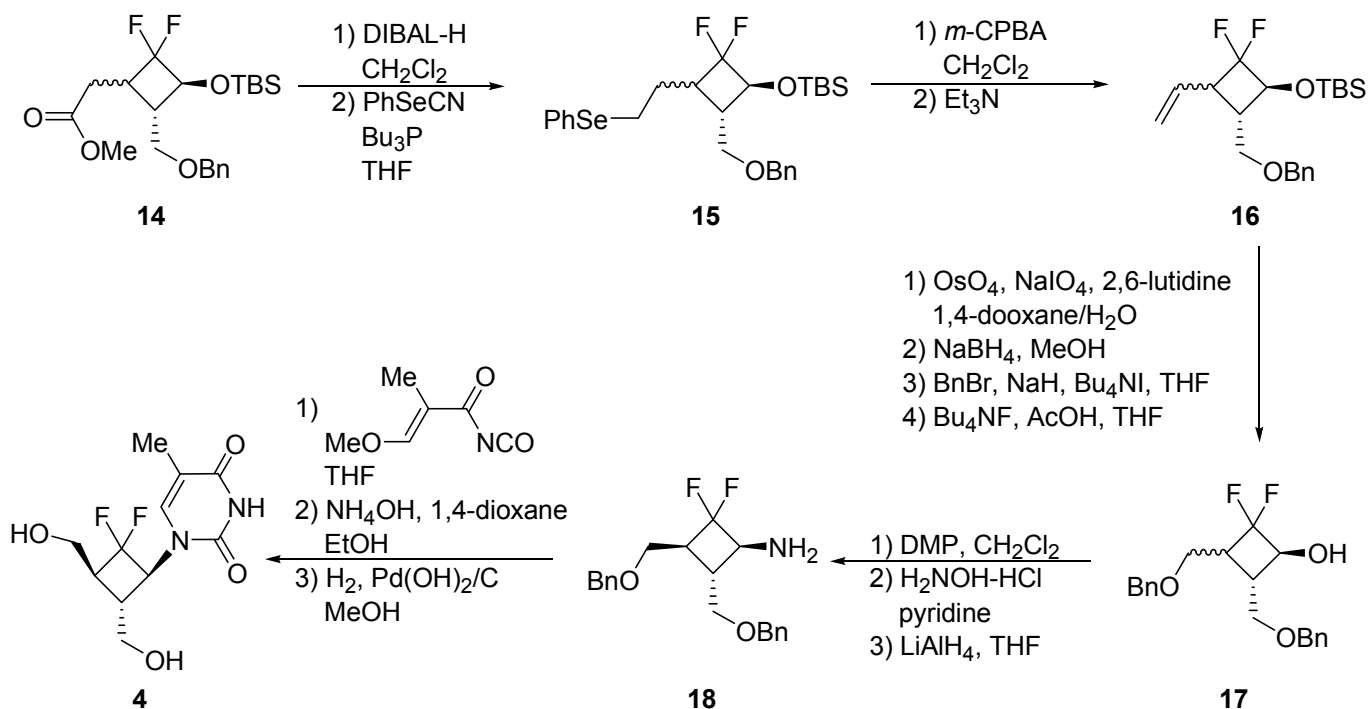

### 3-Benzyloxymethyl-2-*tert*-butyldimethylsiloxy-1,1-difluoro-4-(phenylseleno)ethylcyclobutane (**15**)

To a stirred solution of **14** [3.5 g, 8.44 mmol, diastereomeric mixture (*ca.* 2.6:1)] in CH<sub>2</sub>Cl<sub>2</sub> (85 mL) was dropwise added DIBAL-H (1.0 mol/L in toluene, 33.8 mL, 33.8 mmol) at -80 °C. The resulting mixture was stirred further 20 min at rt. The mixture was partitioned between 0.5 N HCl and CH<sub>2</sub>Cl<sub>2</sub>. Evaporation of all of volatiles of the organic layer gave a crude alcohol (*ca.* 3.3 g). This was used for next step without further purification. To a THF (85 mL) solution of above alcohol was added PhSeCN (2.07 mL, 16.9 mmol) and Bu<sub>3</sub>P (4.22 mL, 16.9 mmol) at 0 °C. The resulting mixture was further stirred for 16 h at same temperature. This was partitioned between aq. saturated NaHCO<sub>3</sub> and AcOEt. Column chromatography on neutral silica gel (hexane/Et<sub>2</sub>O = 7/1) of the organic layer gave a mixture of **15** (4.32 g, 97% for two steps, *ca.* 3:1 of diastereomeric mixture). Analytical samples were prepared by preparative TLC (hexane/AcOEt = 50/1, four times evolution). This gave *major-15* (fast moving) and *minor-15* (slow moving) respectively each as an oil.

**Physical data for *major-15***: <sup>1</sup>H NMR (400 MHz, CDCl<sub>3</sub>) δ 0.06 (s, 3H), 0.08 (s, 3H), 0.89 (s, 9H), 1.79-1.89 (m, 2H), 1.97-2.06 (m, 1H), 2.31-2.39 (m, 1H), 2.84 (ddd, *J* = 12.0, 8.8 and 6.4 Hz, 1H), 2.94 (ddd, *J* = 12.0, 9.2 and 6.0 Hz, 1H), 3.52 (d, *J* = 4.4 Hz, 2H), 4.12-4.18 (m, 1H), 4.49-4.51 (m, 2H), 7.23-7.36 (m, 8H), 7.45-7.48 (m, 2H); <sup>13</sup>C NMR (125 MHz, CDCl<sub>3</sub>) δ -5.2, -5.0, 18.1, 25.0, 25.6, 27.3 (d, *J*<sub>C,F</sub> = 4.8 Hz), 41.2, (t, *J*<sub>C,F</sub> = 20.3 Hz), 42.6 (d, *J*<sub>C,F</sub> = 23.4 Hz), 68.5, 71.6 (dd, *J*<sub>C,F</sub> = 23.8 and 17.9 Hz), 73.1, 120.7 (dd, *J*<sub>C,F</sub> = 293.3 and 274.2 Hz), 126.9, 127.6, 127.7, 128.4m 129.1, 129.8, 132.6, 138.0; <sup>19</sup>F NMR (470 MHz, CDCl<sub>3</sub>) δ -90.0 (d, *J* = 199.8 Hz), -137.2 (d, *J* = 199.8 Hz). HRFAB-MS (*m/z*) 527.1700 (M<sup>+</sup>+H) calcd for C<sub>26</sub>H<sub>37</sub>F<sub>2</sub>O<sub>2</sub>SiSe (M<sup>+</sup>+H) 527.1696.

**Physical data for *minor-15***: <sup>1</sup>H NMR (400 MHz, CDCl<sub>3</sub>) δ 0.05 (s, 3H), 0.07 (s, 3H), 0.88 (s, 9H), 1.79-1.96 (m, 2H), 2.34-2.43 (m, 1H), 2.75-2.80 (m, 1H), 2.85 (ddd, *J* = 12.0, 10.0 and 6.4 Hz, 1H), 2.99 (ddd, *J* = 12.0, 10.4 and 5.2 Hz, 1H), 3.48 (t, *J* = 10.0 Hz, 1H), 3.53 (dd, *J* = 10.0 and 4.8 Hz, 1H), 4.13-4.20 (m, 1H), 4.43 (t, *J* = 12.4 Hz, 2H), 7.23-7.34 (m, 8H), 7.46-7.48 (m, 2H); <sup>13</sup>C NMR (125 MHz, CDCl<sub>3</sub>) δ -5.2, -5.0, 18.1, 25.6, 25.8, 29.7, 39.3 (d, *J*<sub>C,F</sub> = 17.9 Hz), 43.0 (t, *J*<sub>C,F</sub> = 20.3 Hz), 67.3 (d, *J*<sub>C,F</sub> = 3.6 Hz), 73.2, 73.6 (dd, *J*<sub>C,F</sub> = 27.4 and 20.3 Hz), 120.6 (dd, *J*<sub>C,F</sub> = 293.3 and 281.4 Hz), 126.8, 127.7, 127.8, 128.4, 129.0, 129.9, 132.5, 137.8; <sup>19</sup>F NMR (470 MHz, CDCl<sub>3</sub>) δ -104.6 (d, *J* = 199.8 Hz), -115.2 (d, *J* = 199.8 Hz). HRFAB-MS (*m/z*) 527.1700 (M<sup>+</sup>+H) calcd for C<sub>26</sub>H<sub>37</sub>F<sub>2</sub>O<sub>2</sub>SiSe (M<sup>+</sup>+H) 527.1696.

### 3-Benzyloxymethyl-2-*tert*-butyldimethylsiloxy-1,1-difluoro-4-vinylcyclobutane (16)

To a CH<sub>2</sub>Cl<sub>2</sub> (80 mL) solution of **15** (4.2 g, 7.99 mmol, *ca.* 2.6:1 of diastereomeric mixture) was treated with *m*-CPBA (70%, 1.99 g, 8.07 mmol) at 0 °C. The resulting mixture was stirred for 10 min at same temperature, then added Et<sub>3</sub>N (5.58 mL, 40 mmol). The mixture was refluxed for 20 h. The mixture was partitioned between aq. saturated NaHCO<sub>3</sub> and CH<sub>2</sub>Cl<sub>2</sub>. Column chromatography on silica gel (hexane/Et<sub>2</sub>O = 60/1) of the organic layer gave an inseparable mixture of **16** (2.52 g, 86% for two steps, 2.6:1) as an oil. Analytical sample was prepared by preparative TLC (hexane/AcOEt = 40/1, *ca.* 2:1 mixture): <sup>1</sup>H NMR (400 MHz, CDCl<sub>3</sub>) δ 0.09 (s, 4.5H), 0.10 (s, 4.5H), 0.90 (s, 13.5H), 2.02-2.09 (m, 1H), 2.45-2.49 (m, 0.5H), 2.79-2.88 (m, 1H), 3.30-3.34 (m, 0.5H), 3.49-3.62 (m, 3H), 4.23-4.30 (m, 1H), 4.33-4.44 (m, 0.5H), 4.47-4.55 (m, 3H), 5.15-5.21 (m, 3H), 5.75 (dt, *J* = 16.4 and 9.6 Hz, 0.5H), 5.84 (ddd, *J* = 17.2, 10.4 and 7.6 Hz, 1H), 7.27-7.37 (m, 7.5H); <sup>13</sup>C NMR for *major-16* (125 MHz, CDCl<sub>3</sub>) δ -5.2, -5.0, 18.1, 25.6, 42.4 (d, *J*<sub>C,F</sub> = 23.9 Hz), 44.4 (dd, *J*<sub>C,F</sub> = 22.7 and 19.1 Hz), 67.0 (d, *J*<sub>C,F</sub> = 2.4 Hz), 71.4 (dd, *J*<sub>C,F</sub> = 23.9 and 17.9 Hz), 73.0, 118.9, 120.1 (dd, *J*<sub>C,F</sub> = 296.3 and 274.8 Hz), 127.5, 127.6, 128.4, 130.7 (d, *J*<sub>C,F</sub> = 6.0 Hz), 138.1; <sup>19</sup>F NMR for *major-16* (470 MHz, CDCl<sub>3</sub>) δ -91.4 (d, *J* = 190.7 Hz), -136.0 (d, *J* = 190.7 Hz); <sup>13</sup>C NMR for *minor-16* (125 MHz, CDCl<sub>3</sub>) δ -5.2, -5.0, 18.1, 25.6, 40.7 (d, *J*<sub>C,F</sub> = 17.9 Hz), 48.0 (t, *J*<sub>C,F</sub> = 21.5 Hz), 67.4 (d, *J*<sub>C,F</sub> = 3.6 Hz), 73.1, 73.6 (dd, *J*<sub>C,F</sub> = 26.2 and 19.1 Hz), 119.7 (dd, *J*<sub>C,F</sub> = 294.5 and 281.4 Hz), 120.2, 127.6, 127.8, 128.3, 130.0 (t, *J*<sub>C,F</sub> = 3.6 Hz), 138.1; <sup>19</sup>F NMR for *minor-16* (470 MHz, CDCl<sub>3</sub>) δ -100.2 (d, *J* = 199.8 Hz), -118.0 (d, *J* = 199.8 Hz). HRFAB-MS (*m/z*) 369.2086 (M<sup>+</sup>+H) calcd for C<sub>20</sub>H<sub>31</sub>F<sub>2</sub>O<sub>2</sub>Si (M<sup>+</sup>+H) 369.2061.

### 3,4-Bis-benzyloxymethyl-2,2-difluorocyclobutanol (17)

To a mixture of **16** (2.7 g, 7.35 mmol, *ca.* 2.6:1 of diastereomeric mixture), NaIO<sub>4</sub> (12.56 g, 58.8 mmol) and 2,6-lutidine (1.63 mL, 14.7 mmol) in 1,4-dioxane/H<sub>2</sub>O (3/1, 200 mL) was added OsO<sub>4</sub> (0.16 mol/L in H<sub>2</sub>O, 938 μL, 0.15 mmol). The resulting suspension was stirred at rt for 7 h. After filtration of the mixture through a celite pad, the filtrate was evaporated below 30 °C until half volume of the volatiles were removed. To the residue was added MeOH (100 mL) and NaBH<sub>4</sub> (2.78 g, 73.5 mmol) at 0 °C. The mixture was stirred further 30 min at same temperature, then added acetone (3 mL). The mixture was filtrated through a celite pad, then the filtrate was evaporated. The residue was partitioned between 1 N HCl and CH<sub>2</sub>Cl<sub>2</sub>. Flush column chromatography on silica gel (hexane/AcOEt = 1/1) of the organic layer gave crude alcohol (*ca.* 2.25 g). This was used for next step without further purification. To an anhydrous THF (30 mL) solution of above alcohol was added NaH (60%, 294 mg, 7.35 mmol) at 0 °C. After 20 min stirring of the resulting mixture, this was treated with BnBr (1.05 mL, 8.82 mmol) and Bu<sub>4</sub>Ni (2.71 g, 7.35 mmol). The mixture was stirred further 6 h at rt. Then, this was partitioned between aq. saturated NH<sub>4</sub>Cl and AcOEt. After evaporation of all of volatiles of the organic layer, this was dissolved in THF (50 mL), then added AcOH (1.26 mL, 22.05 mmol) and Bu<sub>4</sub>NF (1.0 mol/L in THF, 16.2 mL, 16.2 mmol). After 14 h stirring of the resulting mixture at rt, the mixture was partitioned between aq. saturated NaHCO<sub>3</sub> and AcOEt. Column chromatography on silica gel (hexane/AcOEt = 1/1) of the organic layer gave an inseparable mixture of **17** (1.66 g, 65% for four steps, *ca.* 3.0:1) as an oil: <sup>1</sup>H NMR (400 MHz, CDCl<sub>3</sub>) δ 1.86-1.93 (m, 1H), 2.05 (br-s, 1.3H), 2.39-2.42 (m, 0.3H), 2.56-2.68 (m, 1H), 2.90-2.92 (m, 0.3H), 3.55 (dd, *J* = 9.6 and 4.8 Hz, 1H), 3.59-3.64 (m, 2.6H), 3.67-3.77 (m, 1.6H), 4.20-4.27 (m, 1H), 4.34-4.41 (m, 0.3H), 4.43-4.57 (m, 5.2H), 7.28-7.37 (m, 13H); <sup>13</sup>C NMR for *major-17* (125 MHz, CDCl<sub>3</sub>) δ 40.7 (d, *J*<sub>C,F</sub> = 20.3 Hz), 41.9 (t, *J*<sub>C,F</sub> = 20.3 Hz), 66.0 (d, *J*<sub>C,F</sub> = 6.0 Hz), 68.6 (d, *J*<sub>C,F</sub> = 2.4 Hz), 72.3 (dd, *J*<sub>C,F</sub> = 25.0 and 19.1 Hz), 73.0, 73.1, 119.9 (dd, *J*<sub>C,F</sub> = 295.7 and 271.9 Hz), 127.5, 127.6, 127.7, 127.7, 128.4, 128.4, 137.9, 138.0; <sup>19</sup>F NMR for *major-17* (470 MHz, CDCl<sub>3</sub>) δ -92.7 (d, *J* = 199.8 Hz), -137.6 (d, *J* = 199.8 Hz); <sup>13</sup>C NMR for *minor-17* (125 MHz, CDCl<sub>3</sub>) δ 39.9 (d, *J*<sub>C,F</sub> = 17.9 Hz), 43.1 (t, *J*<sub>C,F</sub> = 20.3 Hz), 64.8, 67.6 (d, *J*<sub>C,F</sub> = 3.6 Hz), 73.2, 73.3, 74.3 (dd, *J*<sub>C,F</sub> = 25.1 and 19.1 Hz), 120.1 (dd, *J*<sub>C,F</sub> = 287.4 and 270.7 Hz), 127.6, 127.6, 127.7, 127.8, 128.4, 128.5, 137.8, 137.9; <sup>19</sup>F NMR for *minor-17* (470 MHz, CDCl<sub>3</sub>) δ -104.6 (d, *J* = 199.8 Hz), -120.1 (d, *J* = 199.8 Hz). HRFAB-MS (*m/z*) 349.1613 (M<sup>+</sup>+H) calcd for C<sub>20</sub>H<sub>23</sub>F<sub>2</sub>O<sub>3</sub> (M<sup>+</sup>+H) 349.1615.

**(±)-*t*-3,*c*-4-3,4-Bis(benzyloxymethyl)-1,1-difluorocyclobut-*r*-2-ylamine (18)**

To a CH<sub>2</sub>Cl<sub>2</sub> (20 mL) solution of **17** (700 mg, 2.01 mmol, *ca.* 3:1) was added Dess-Martin periodinane (1.45 g, 3.42 mmol). The resulting mixture was stirred for 1 h at rt. To the mixture was added brine (50 mL) then stirred further 20 min. The mixture was partitioned between aq. saturated NaHCO<sub>3</sub> and CH<sub>2</sub>Cl<sub>2</sub>. Evaporation of all of volatiles of the organic layer gave a crude aldehyde (*ca.* 950 mg). The aldehyde was dissolved in pyridine (30 mL). The pyridine solution was treated with HONH<sub>2</sub>·HCl (1.4 g, 20.1 mmol). The resulting mixture was stirred for 3 days at rt. The resulting mixture was partitioned between NaHCO<sub>3</sub> and CH<sub>2</sub>Cl<sub>2</sub>. Flush column chromatography on silica gel (hexane/AcOEt = 1/1) gave a crude oxime (589 mg). This was well dried under vacuum condition by using P<sub>2</sub>O<sub>5</sub> for 20 h. This was used for next reaction without further purification. To a THF (20 mL) solution of above oxime was dropwise added LiAlH<sub>4</sub> (1.0 mol/L in THF, 4.02 mL, 4.02 mmol) at -40 °C. After 30 min stirring of the resulting mixture -40 °C, this was stirred further 2 h at rt. The mixture was carefully treated with H<sub>2</sub>O (6 mL), aq. 15% NaOH (6 mL) and H<sub>2</sub>O (6 mL) sequentially. After filtration of the mixture through a celite pad, the filtrate was partitioned between brine and AcOEt. Column chromatography on silica gel (hexane/AcOEt = 1/3) of the organic layer gave **18** (220 mg, 32% for three steps) as an oil: <sup>1</sup>H NMR (400 MHz, CDCl<sub>3</sub>) δ 1.55 (br-s, 2H), 1.62-1.69 (m, 1H), 2.62-2.75 (m, 1H), 3.49 (dt, *J* = 11.6 and 8.4 Hz, 1H), 3.56 (dd, *J* = 9.8 and 4.8 Hz, 1H), 3.60 (dd, *J* = 9.8 and 4.8 Hz, 1H), 3.63-3.67 (m, 2H), 4.49 (d, *J* = 12.0 Hz, 1H), 4.53 (s, 2H), 4.54 (d, *J* = 12.0 Hz, 1H), 7.26-7.35 (m, 10J); <sup>13</sup>C NMR (125 MHz, CDCl<sub>3</sub>) δ 40.1 (d, *J*<sub>C,F</sub> = 20.4 Hz), 43.4 (t, *J*<sub>C,F</sub> = 20.4 Hz), 56.5 (t, *J*<sub>C,F</sub> = 22.8 Hz), 66.3 (d, *J*<sub>C,F</sub> = 7.3 Hz), 69.0 (d, *J*<sub>C,F</sub> = 2.4 Hz), 73.0, 73.1, 120.8 (dd, *J*<sub>C,F</sub> = 300.4 and 271.6 Hz), 127.5, 127.5, 127.6, 127.6, 128.3, 128.4, 138.1, 138.2; <sup>19</sup>F NMR (470 MHz, CDCl<sub>3</sub>) δ -91.8 (d, *J* = 190.7 Hz), -136.7 (dd, *J* = 190.7 and 18.2 Hz). HRFAB-MS (*m/z*) 348.1786 (M<sup>+</sup>+H) calcd for C<sub>20</sub>H<sub>24</sub>F<sub>2</sub>NO<sub>2</sub> (M<sup>+</sup>+H) 348.1775.

**NOE experiments of 18**

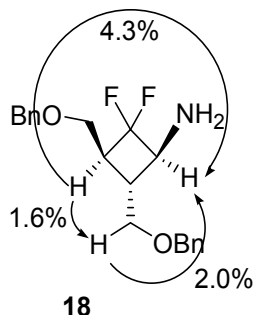

**(±)-1-[*t*-3,*c*-4-3,4-Bis(hydroxymethyl)-1,1-difluorocyclobut-*r*-2-yl]-thymine (4)**

To a CH<sub>2</sub>Cl<sub>2</sub> (2.7 mL) solution of β-methoxy-α-methacrylic acid<sup>6</sup> (208 mg, 1.79 mmol) was added oxalyl chloride (172 μL, 1.97 mmol) and DMF (one drop) at rt. The resulting mixture was stirred for 40 min at same temperature. After evaporation of all of volatiles, the residue was dissolved in dry benzene (3.5 mL) then added a benzene (3.5 mL) suspension of silver cyanate (295 mg, 1.97 mmol). The mixture was refluxed for 30 min, then cooled to rt. The resulting supernatant solution include isocyanate (**19**) was slowly transferred over 1.5 min *via* cannula to a THF (9.3 mL) solution of **18** (207 mg, 0.596 mmol) at -40 °C. The resulting mixture was stirred for 40 min at same temperature. After warming to rt of the mixture, this was stirred further 2 h at rt. The residue was roughly purified by flush column chromatography on silica gel (hexane/AcOEt = 1/1). This gave a crude adduct, which was used for next reaction without further purification. The above residue was dissolved in EtOH (10 mL), 1,4-dioxane (10 mL) and 29% NH<sub>4</sub>OH<sup>7</sup> (20 mL). The resulting solution was heated at 110 °C in a shield tube for 15 h. After evaporation of all of volatiles, the residue was dissolved in MeOH (20 mL). This was treated with 20 wt % of Pd(OH)<sub>2</sub> (200 mg) under positive pressure of H<sub>2</sub> (1 atm) at rt for 4 h. After filtration through a celite pad, the filtrate was purified by preparative TLC (CHCl<sub>3</sub>/acetone = 1/1). This gave **4** (93 mg, 56% for three steps). This was recrystallized from MeOH/1,2-dichloroethane. Mp = 235-237 °C; <sup>1</sup>H NMR (500 MHz, CD<sub>3</sub>OD) δ 1.90 (s, 3H), 2.60-2.63 (m, 1H), 2.65-2.75 (m, 1H), 3.67

(dd,  $J = 11.5$  and  $4.6$  Hz, 1H), 3.71 (dd,  $J = 11.5$  and  $4.6$  Hz, 1H), 3.76 (dd,  $J = 11.5$  and  $5.7$  Hz, 1H), 3.85 (dd,  $J = 11.5$  and  $8.0$  Hz, 1H), 5.10-5.16 (m, 1H), 7.52 (s, 1H);  $^{13}\text{C}$  NMR (125 MHz,  $\text{CD}_3\text{OD}$ )  $\delta$  12.8, 37.6 (d,  $J_{\text{C,F}} = 16.7$  Hz), 46.4 (t,  $J_{\text{C,F}} = 19.1$  Hz), 58.0 (dd,  $J_{\text{C,F}} = 25.0$  and  $17.9$  Hz), 59.0 (d,  $J_{\text{C,F}} = 7.2$  Hz), 61.9, 111.8, 121.9 (dd,  $J_{\text{C,F}} = 295.7$  and  $271.8$  Hz), 140.1 (d,  $J_{\text{C,F}} = 2.4$  Hz), 153.4, 166.7;  $^{19}\text{F}$  NMR (470 MHz,  $\text{CD}_3\text{OD}$ )  $\delta$  -86.4 (d,  $J = 196.2$  Hz), -132.7 (d,  $J = 196.2$  Hz). FAB-MS ( $m/z$ ) 277 ( $\text{M}^+ + \text{H}$ ) Anal. Calcd for  $\text{C}_{11}\text{H}_{14}\text{F}_2\text{N}_2\text{O}_4$ : C, 47.83; H, 5.11; N, 10.14. Found: C, 47.48; H, 5.06; N, 10.02.

#### NOE experiments of 4

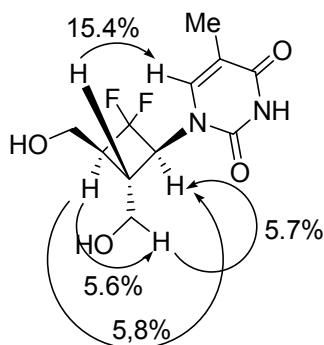

6) Csuk, R.; Scholz, Y. *Tetrahedron* **1995**, *51*, 7193.

7) Wang, P.; Agrofoglio, L. A.; Newton, M. G.; Chu, C. K. *J. Org. Chem.* **1999**, *64*, 4173.

#### 16. Table SI-1. SOMO and LUMO values of model radical intermediates 5c'-5f'

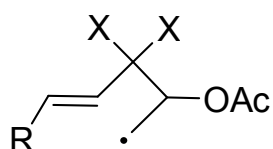

**5c'** R =  $\text{CO}_2\text{Me}$ , X = F

**5e'** R = H, X = F

**5f'** R =  $\text{CO}_2\text{Me}$ , X = H

| radical    | SOMO (eV) <sup>a</sup> | LUMO (eV) <sup>b</sup> |
|------------|------------------------|------------------------|
| <b>5c'</b> | -0.22456               | 0.03084                |
| <b>5e'</b> | -0.21952               | 0.04128                |
| <b>5f'</b> | -0.22244               | 0.04433                |

<sup>a</sup>Calculations were carried out by using UB3LYP/6-31G.

<sup>b</sup>Calculations were carried out by using UB3LYP/6-31G<sup>\*</sup>.



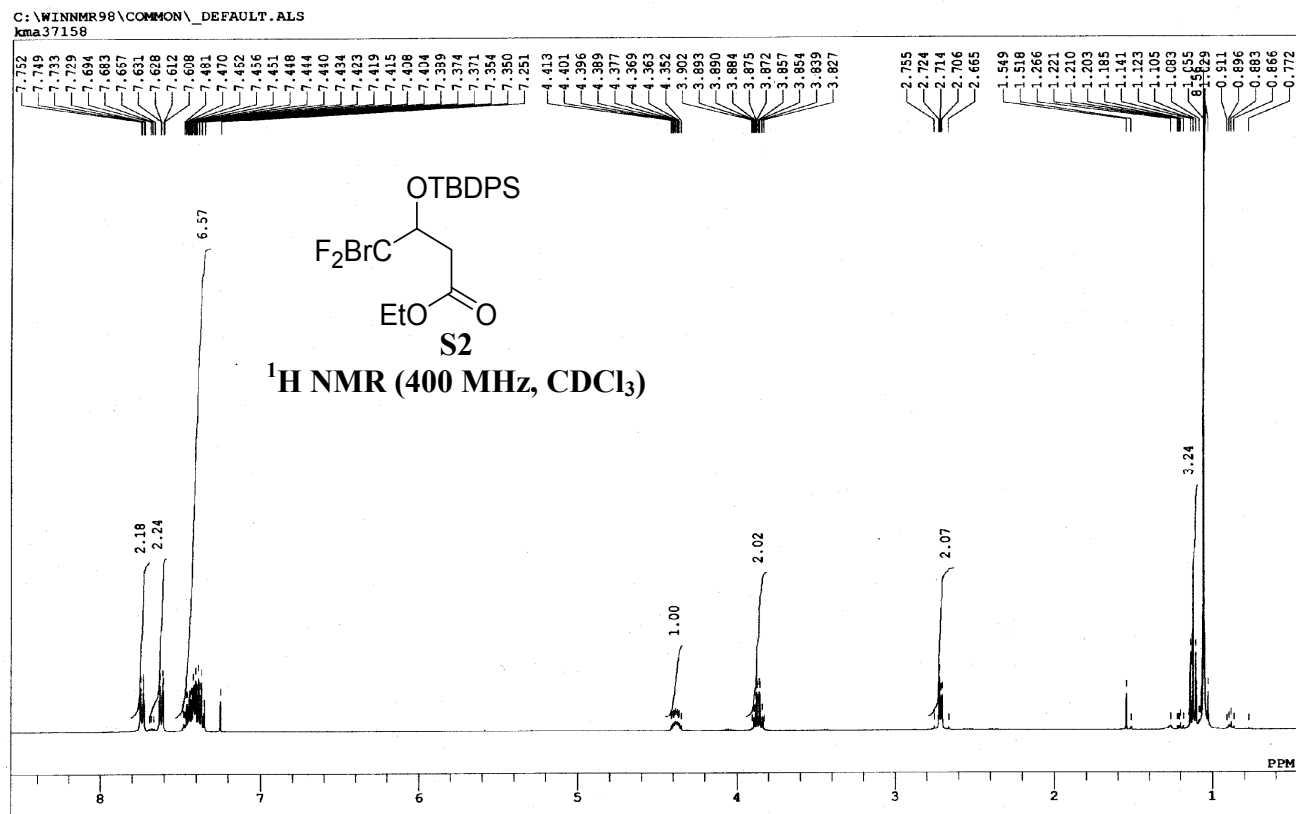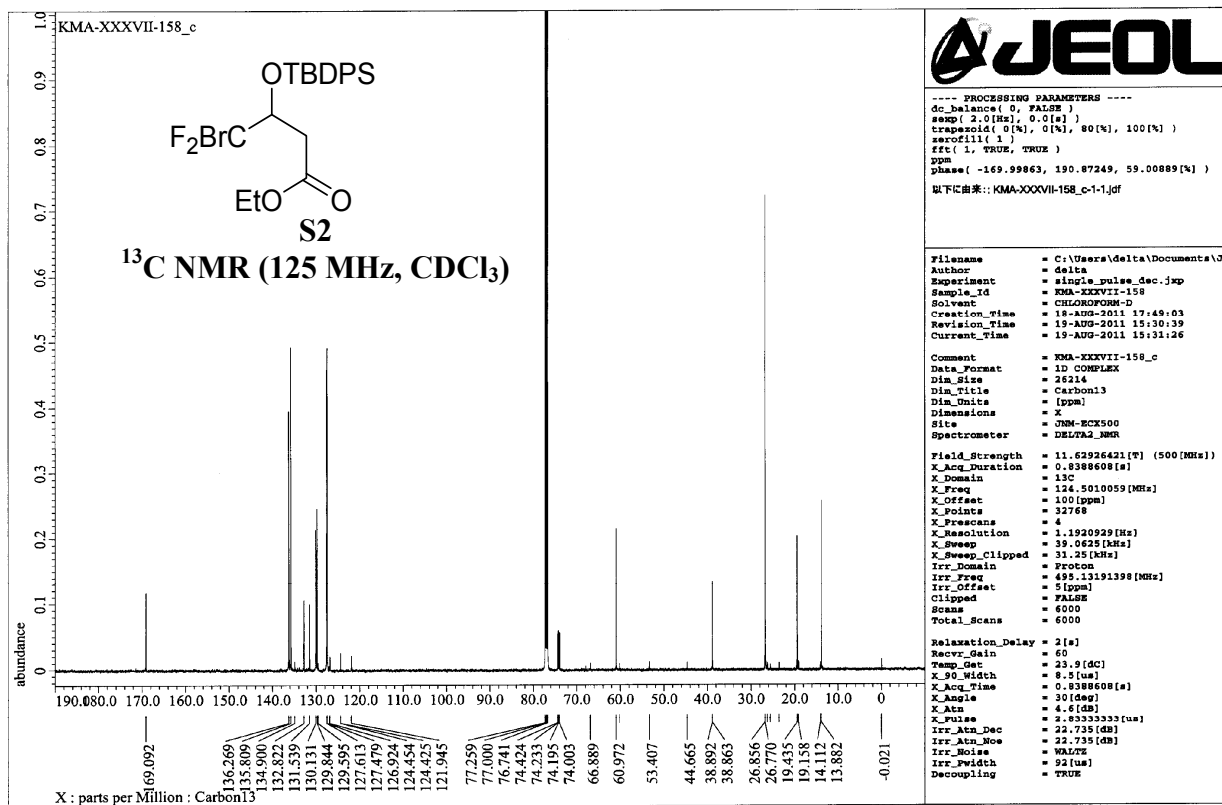

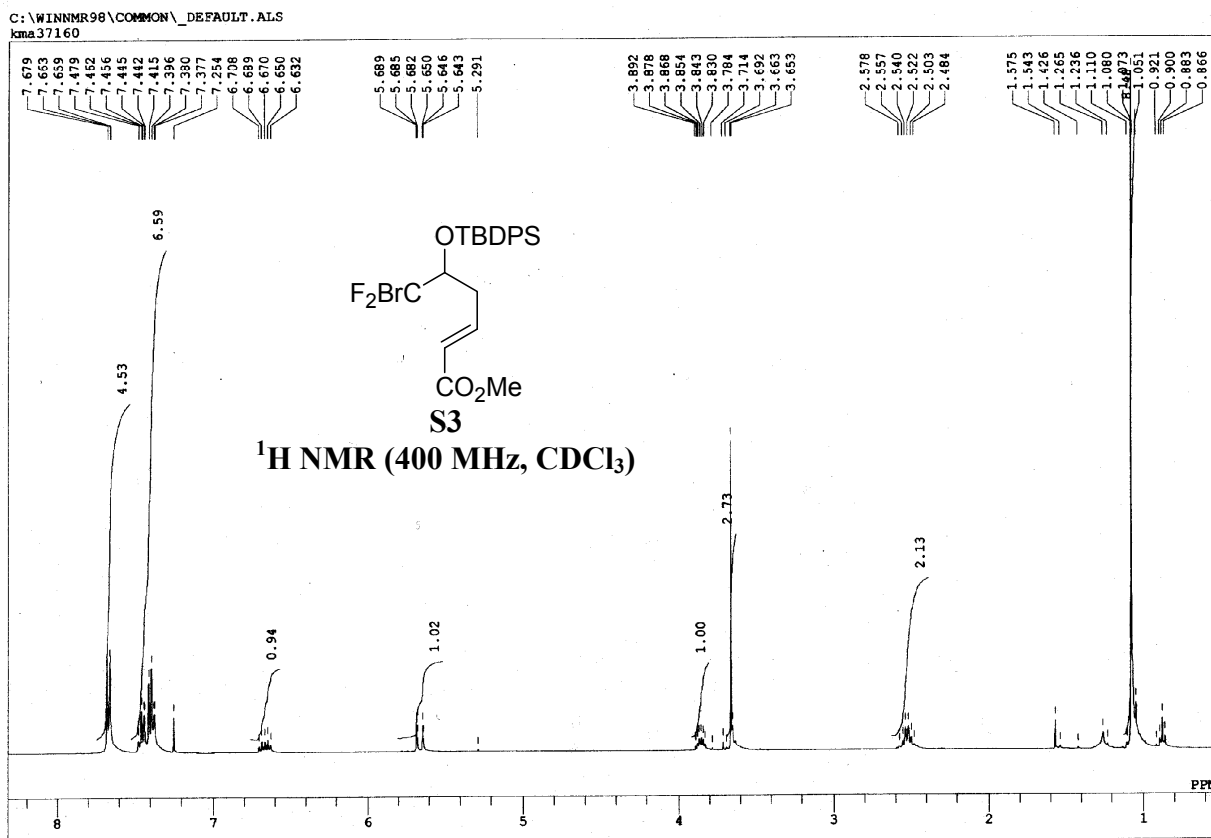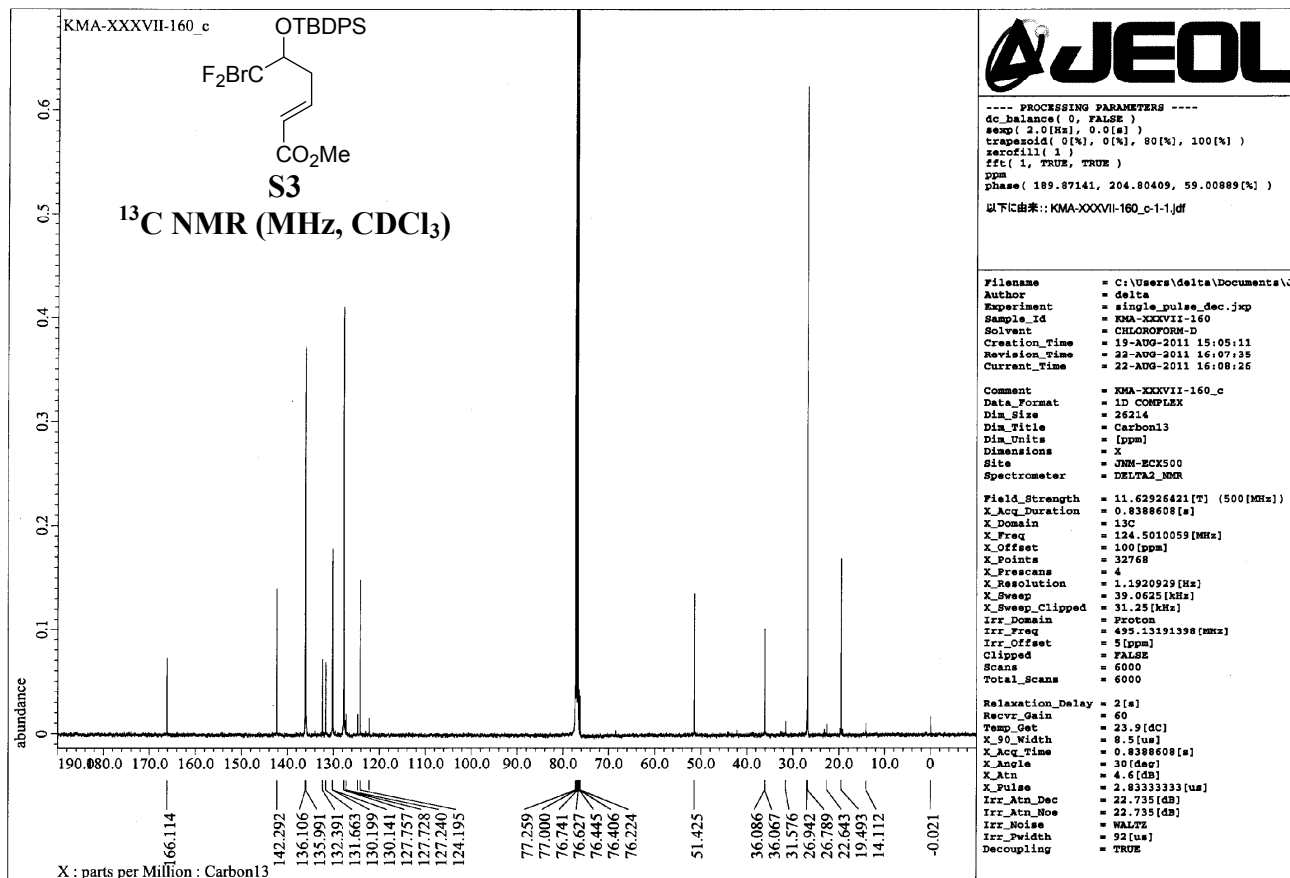

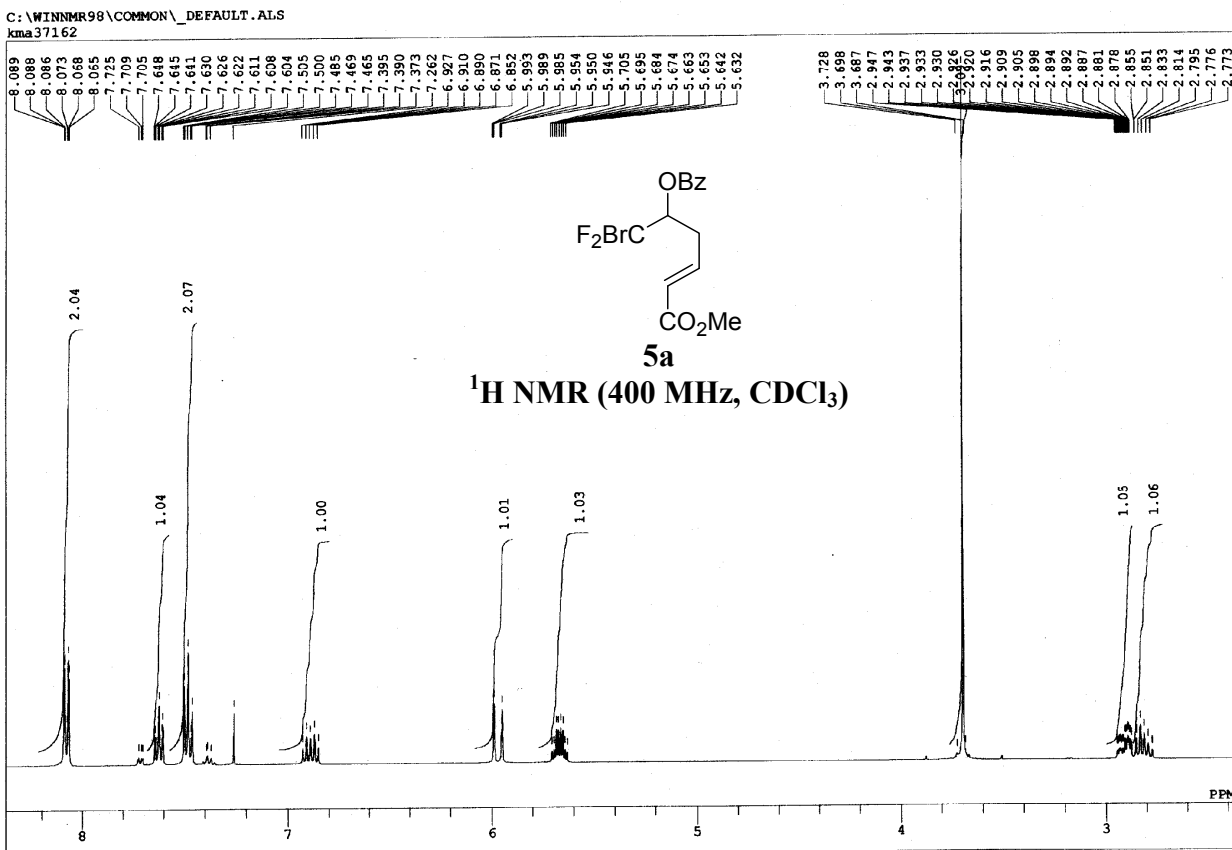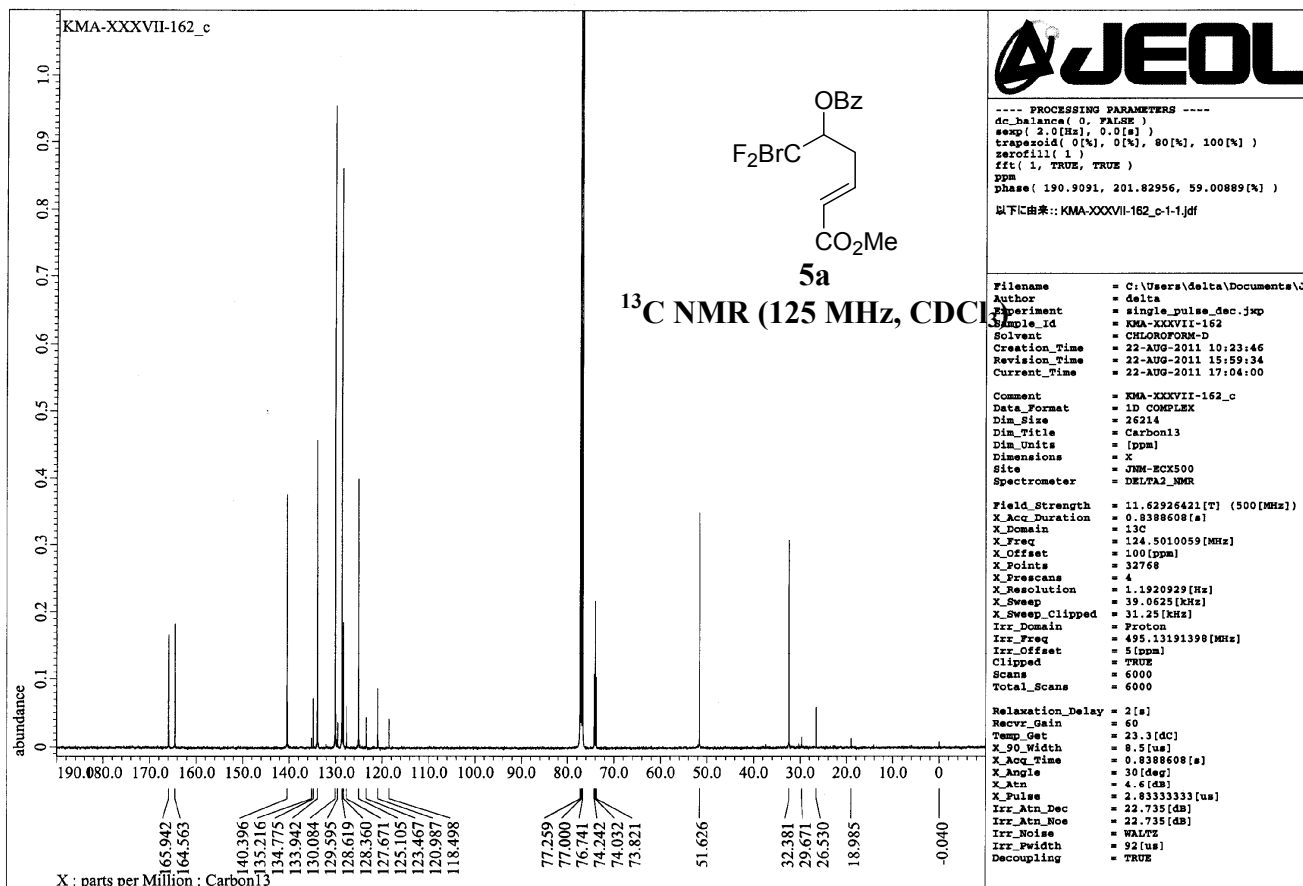

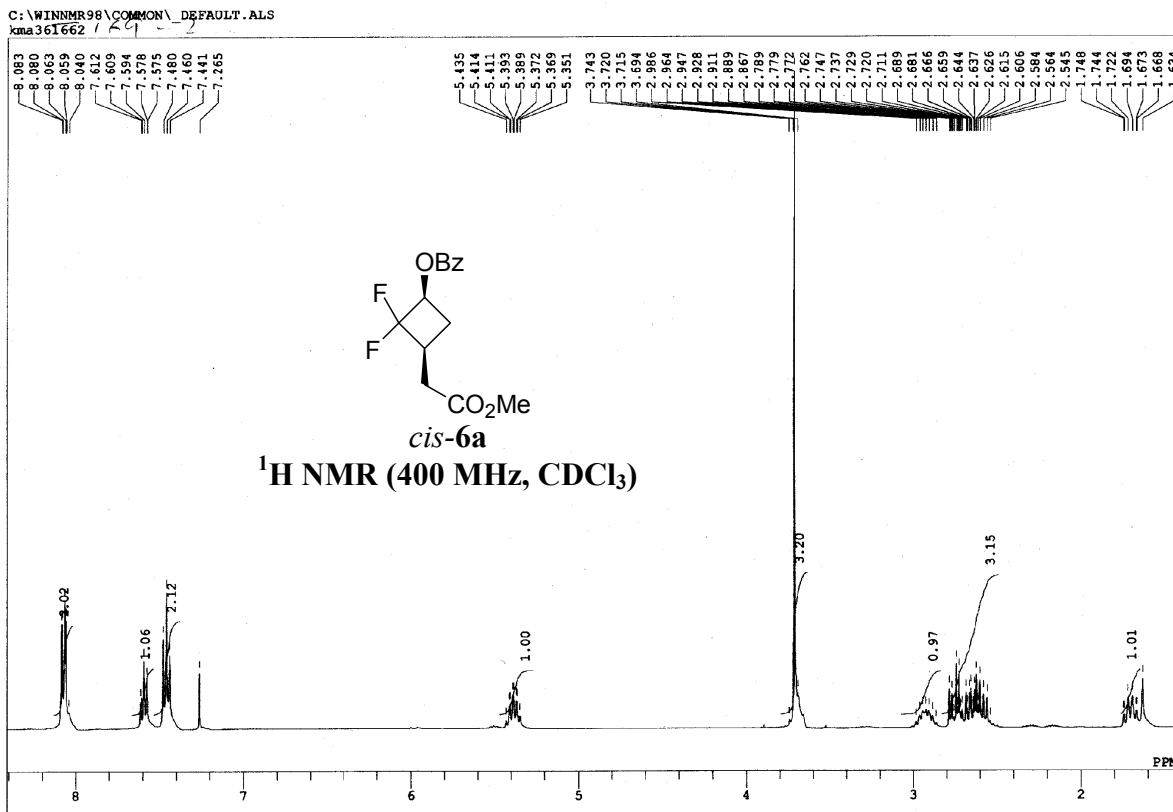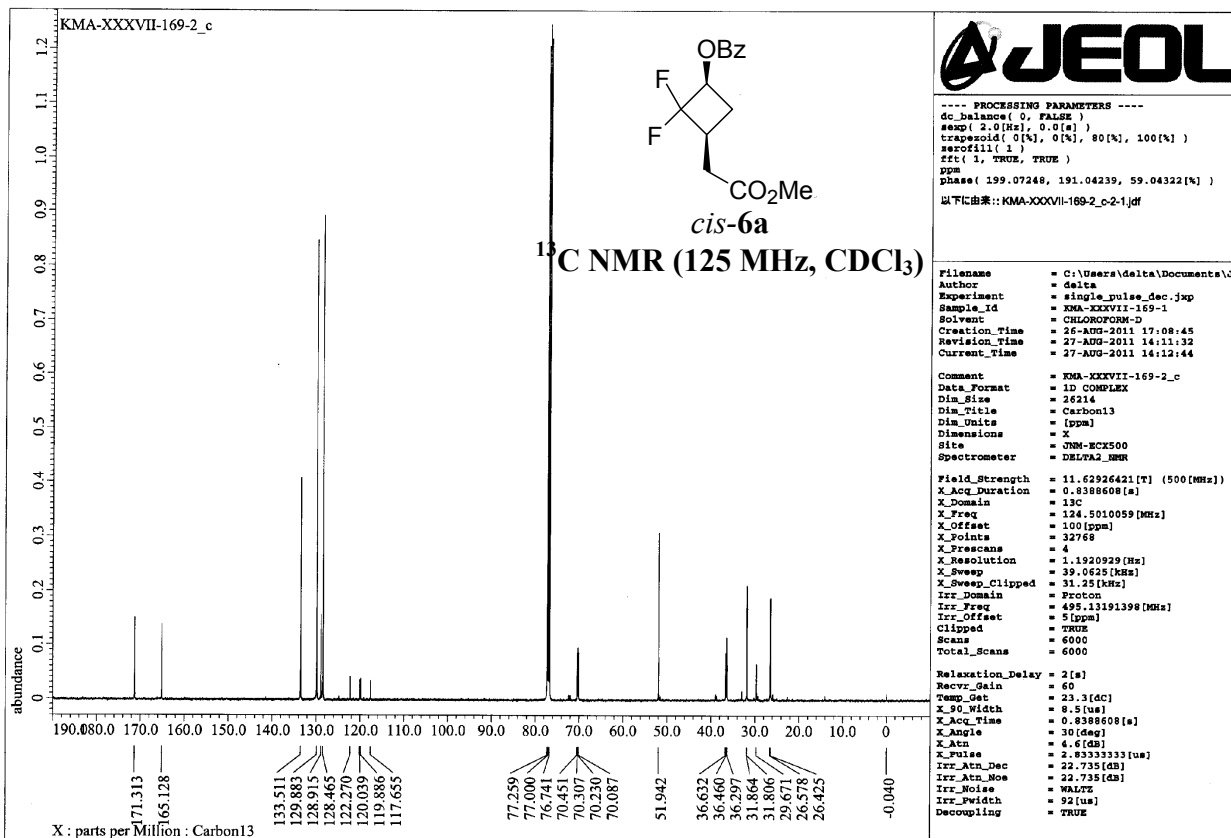

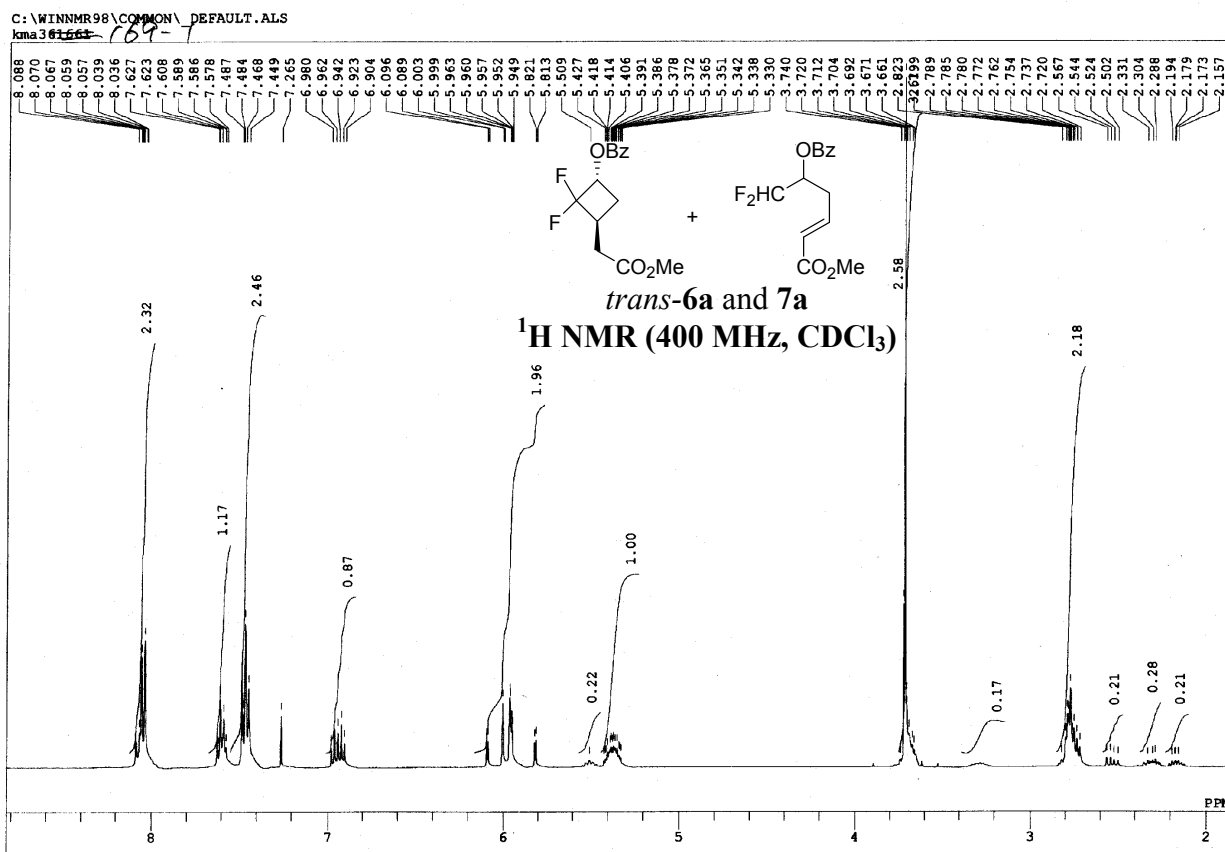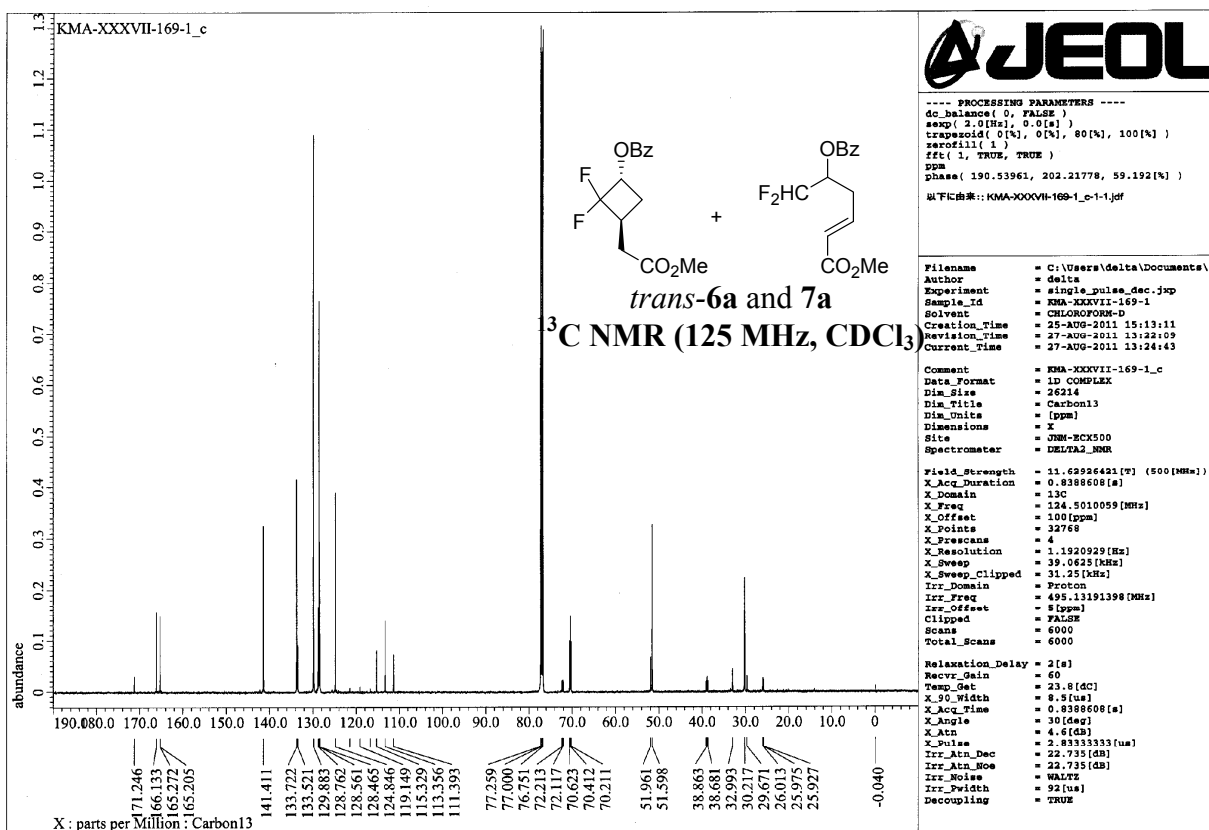



C:\WINNMR98\COMMON\\_DEFAULT.ALS  
 kma34171

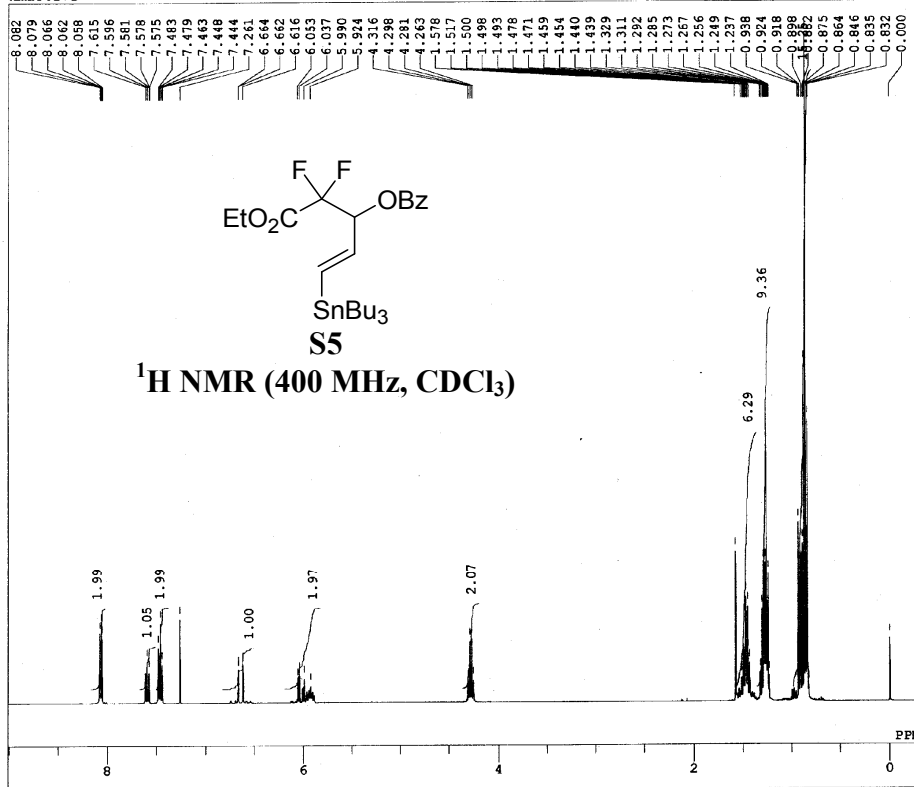

DFILE C:\WINNMR98\COMMON\\_DEFAULT.ALS  
 COMNT kma34171  
 DATIM Tue Aug 23 14:26:59 2011  
 1H  
 OBNUC NON  
 EXMOD  
 OBFPRQ 399.65 MHz  
 OBSFET 124.00 KHz  
 OBFIN 10500.00 Hz  
 POINT 32768  
 FREQU 7992.01 Hz  
 SCANS 40  
 ACQTM 4.1001 sec  
 PD 2.9000 sec  
 PW1 5.80 usec  
 IRNUC 1H  
 CTEMP 23.4 c  
 SLVNT CDCL3  
 EXREF 0.00 ppm  
 BF 0.12 Hz  
 RGAIN 12

KMA-XXXVII-171\_c

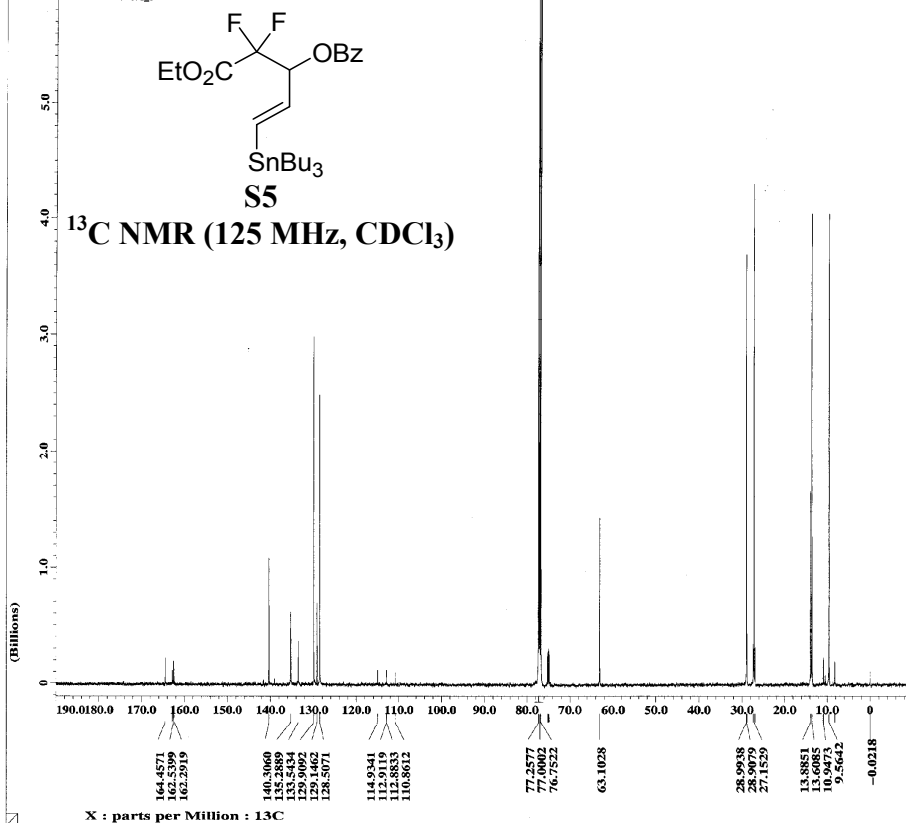

**JEOL**

----- ACQUISITION PARAMETERS -----  
 Derived from: KMA-XXXVII-171\_c.1  
 File Name = KMA-XXXVII-171\_c.5  
 Author = delta  
 Sample ID = KMA-XXXVII-171  
 Content = KMA-XXXVII-171\_c  
 Creation Date = 7-SEP-2011 01:03:18  
 Revision Date = 7-SEP-2011 17:43:06  
 Spec Site = KCA 500  
 Spec Type = DELTA2 NMR  
 Data Format = 1D COMPLEX  
 Dimensions = X  
 Dim Title = 13c  
 Dim Size = 26214  
 Dim Units = [ppm]  
 Field\_strength = 11.7473579 [M] (500[MH  
 X\_offset = 0.83361792 [a]  
 X\_domain = 13C  
 X\_freq = 125.76529768 [MHz]  
 X\_offset = 100 [ppm]  
 X\_points = 32768  
 X\_prescans = 4  
 X\_resolution = 1.19959034 [Hz]  
 X\_sweep = 39.3081761 [kHz]  
 IRR\_domain = 1H  
 IRR\_freq = 500.15991521 [MHz]  
 IRR\_offset = 5.0 [ppm]  
 Mod\_return = 1  
 Scans = 10000  
 Total\_scans = 10000  
 X\_90\_width = 10.5 [us]  
 X\_acq\_time = 0.83361792 [s]  
 X\_angle = 30 [deg]  
 X\_ato = 6.8 [dB]  
 X\_pulse = 3.5 [us]  
 IRR\_atn\_dec = 19.6 [dB]  
 IRR\_atn\_poc = 21.6 [dB]  
 IRR\_noise = WALTZ  
 Decoupling = TRUE  
 Initial\_wait = 1 [s]  
 Noe = TRUE  
 Noe\_time = 2 [s]  
 Relaxation\_delay = 2 [s]  
 Repetition\_time = 2.83361792 [s]  
 Experiment = single\_pulse\_dec  
 Recv\_gain = 60  
 Solvent = CHLOROFORM-D

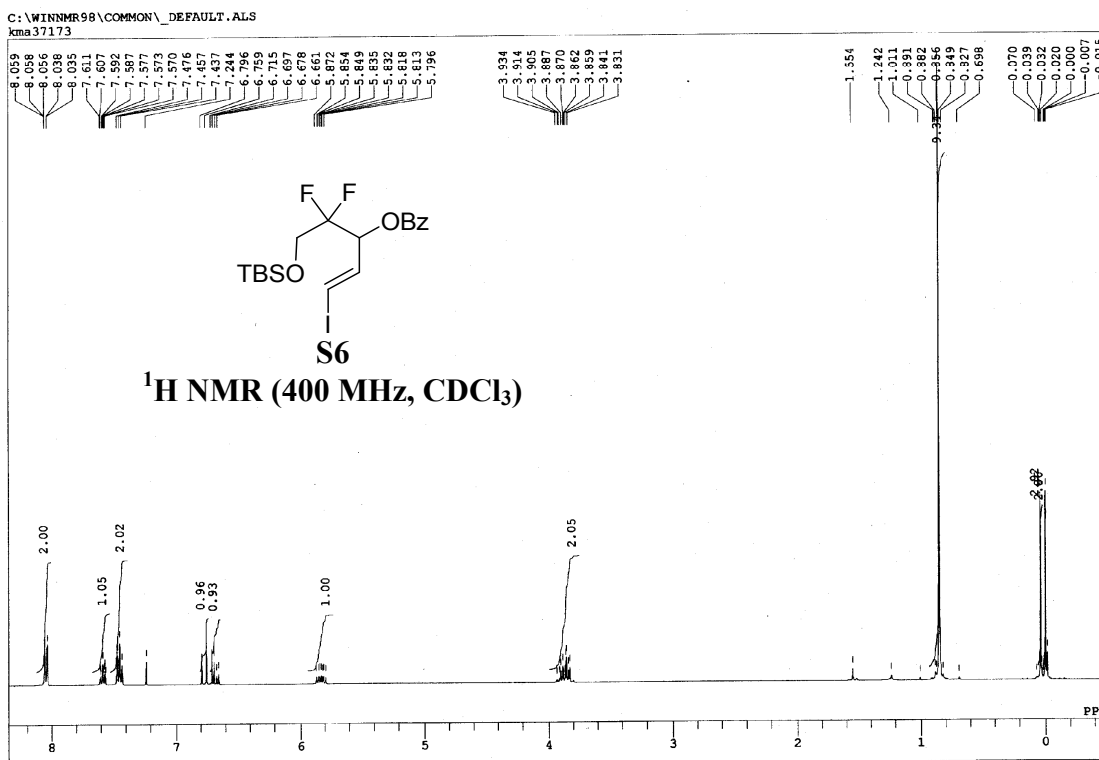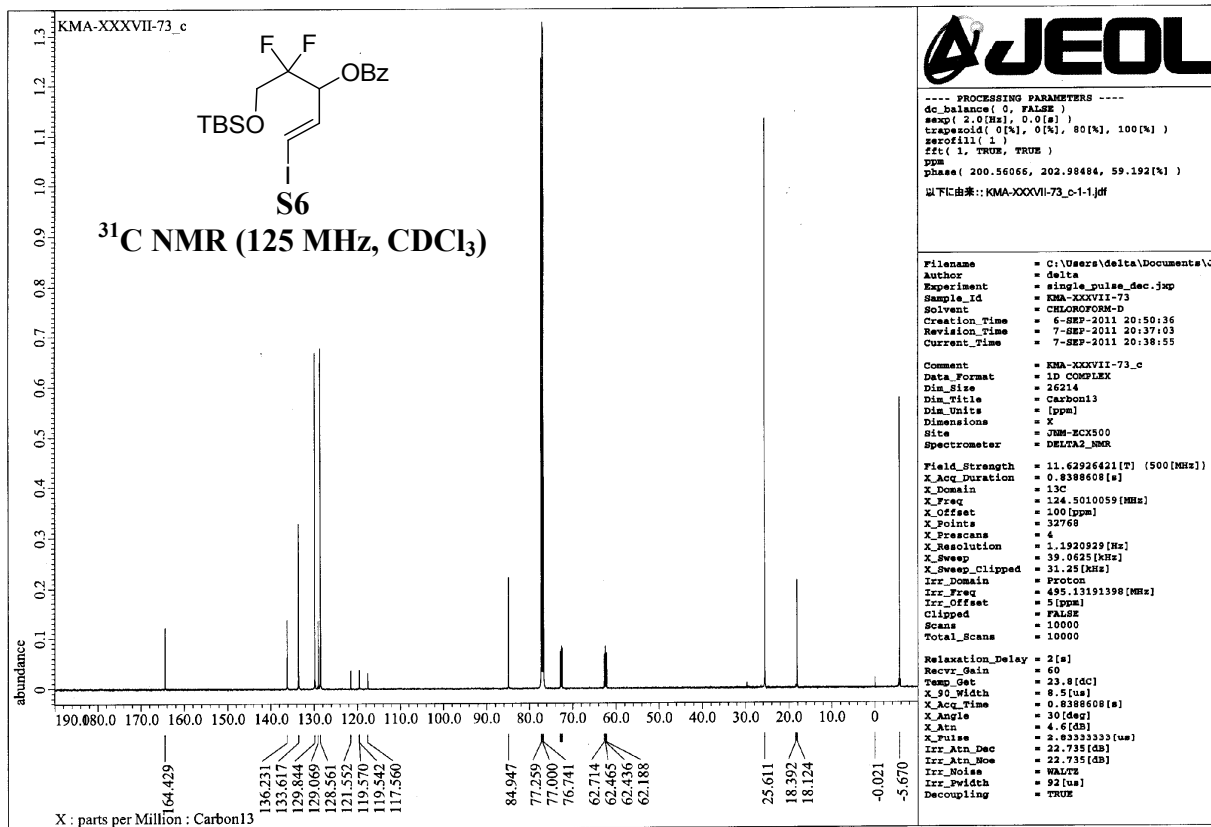

C:\WINNMR98\COMMON\\_DEFAULT.ALS  
 kma371752

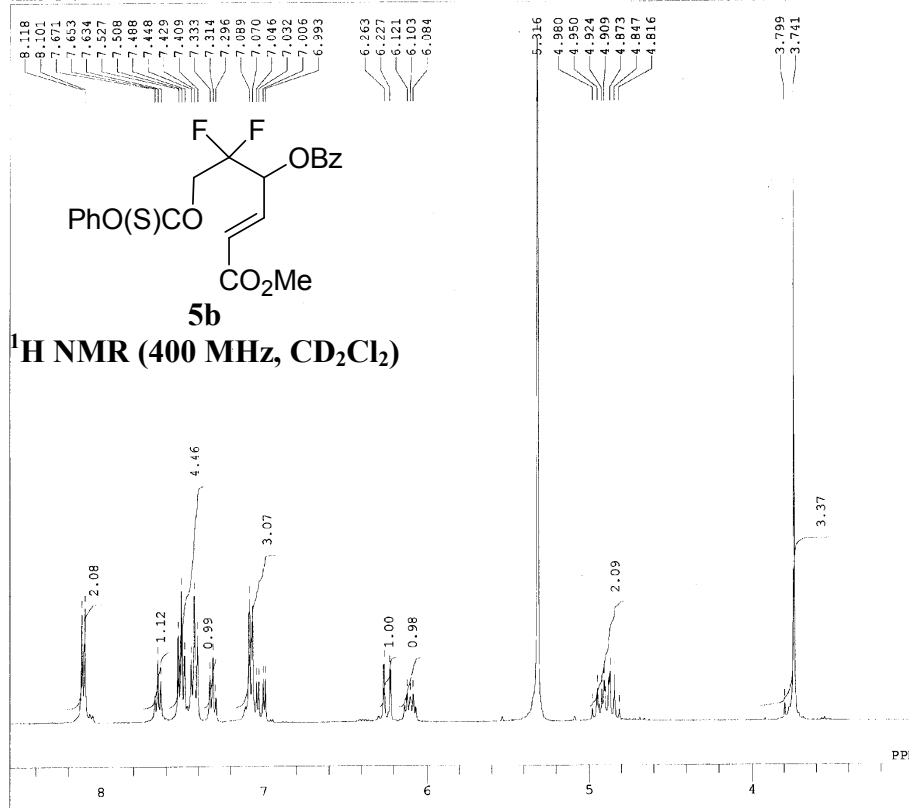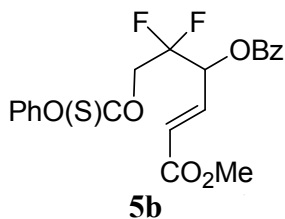

<sup>1</sup>H NMR (400 MHz, CD<sub>2</sub>Cl<sub>2</sub>)

DFILE C:\WINNMR98\COMMON\\_DEFAULT.ALS  
 COMPT kma371752  
 DATIM Tue Sep 06 08:34:22 2011  
 OENUC 1H  
 EXMOD NON  
 OBFRO 399.65 MHz  
 OBSET 124.00 KHz  
 OBFIN 10500.00 Hz  
 POINT 32768  
 FREQU 7992.01 Hz  
 SCANS 40  
 ACOTM 4.1001 sec  
 PD 2.9000 sec  
 PW1 5.80 usec  
 IRNUC 1H  
 CTEMP 23.8 c  
 SLVNT CD2CL  
 EXREF 0.00 ppm  
 BF 1.00 Hz  
 RGAIN 21

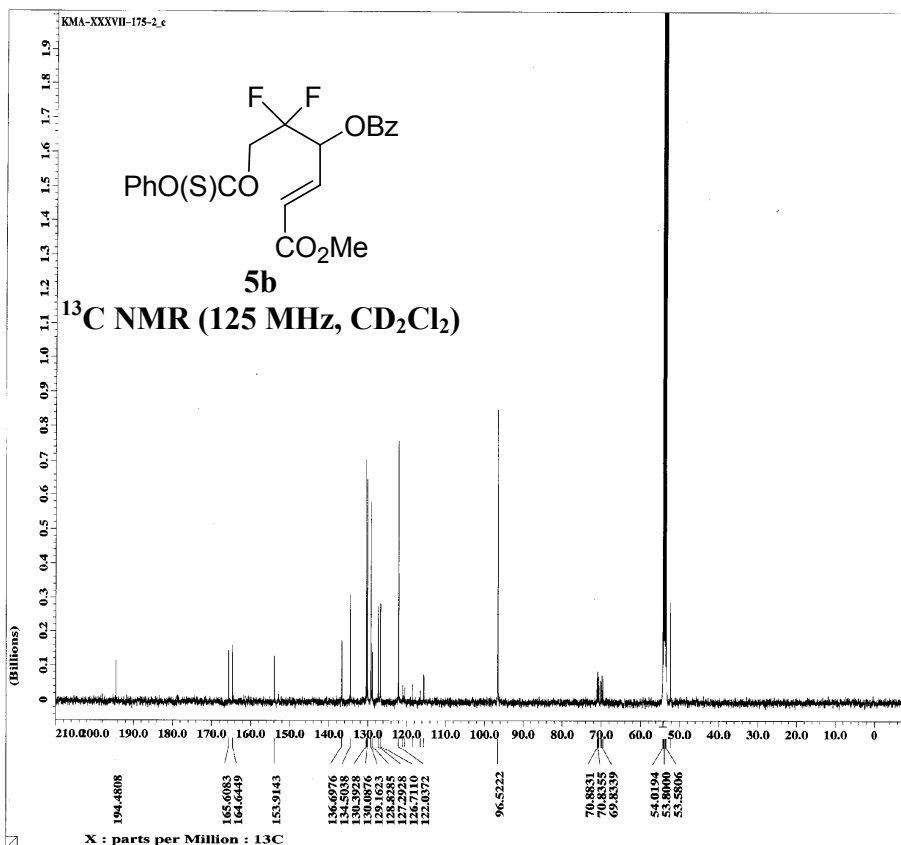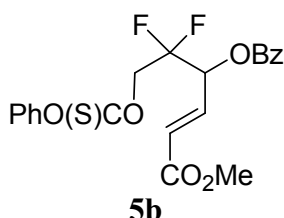

<sup>13</sup>C NMR (125 MHz, CD<sub>2</sub>Cl<sub>2</sub>)

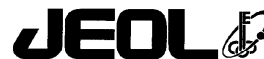

--- ACQUISITION PARAMETERS ---  
 Derived from: KMA-XXXVII-175-2\_c\_1  
 File Name = KMA-XXXVII-175-2\_c\_4  
 Author = Delta  
 Sample ID = KMA-XXXVII-175-2  
 Content = KMA-XXXVII-175-2\_c  
 Creation Date = 2-SEP-2011 21:20:50  
 Revision Date = 3-SEP-2011 14:27:23  
 Spec Site = KCA 500  
 Spec Type = DELTA2\_NMR  
 Data Format = 1D COMPLEX  
 Dimensions = X  
 Dim Title = 13C  
 Dim Size = 26214  
 Dim Units = [ppm]  
 Field Strength = 11.7473579(T) (500[MH  
 X\_acq\_duration = 0.83361792[s]  
 X\_domain = 13C  
 X\_freq = 125.76529768[MHz]  
 X\_offset = 100[ppm]  
 X\_points = 32768  
 X\_prescans = 4  
 X\_resolution = 1.19959034[Hz]  
 X\_sweep = 19.3081761[kHz]  
 Irr\_domain = 1H  
 Irr\_freq = 500.15991521[MHz]  
 Irr\_offset = 5.0[ppm]  
 Mod\_return = 1  
 Scans = 6000  
 Total\_scans = 6000  
 X\_90\_width = 10.5[us]  
 X\_acq\_time = 0.83361792[s]  
 X\_angle = 90[deg]  
 X\_atn = 6.8[db]  
 X\_pulse = 3.5[us]  
 Irr\_atn\_dec = 19.6[db]  
 Irr\_atn\_noe = 21.6[db]  
 Irr\_noise = WALTZ  
 Decoupling = TRUW  
 Initial\_wait = 1[s]  
 Noe = TRUW  
 Noe\_time = 2[s]  
 Relaxation\_delay = 2[s]  
 Repetition\_time = 2.83361792[s]  
 Experiment = stg1e\_pulse\_dec  
 Recvr\_gain = 60  
 Solvent = METHYLENE-CHLORI

C:\WINNMR98\COMMON\_DEFAULT.ALS  
 kma37179

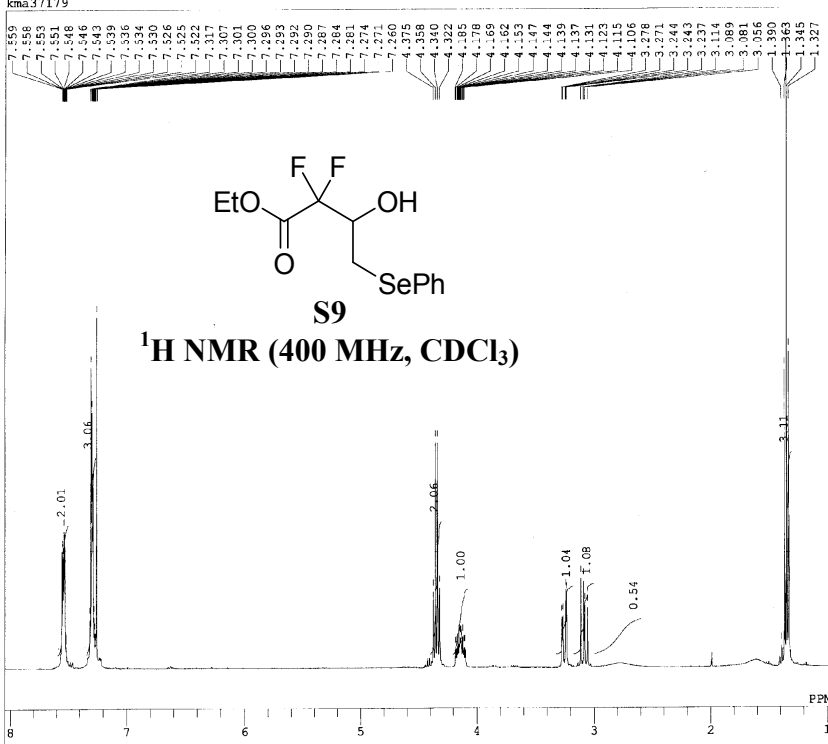

DFILE C:\WINNMR98\COMMON\_DEFAULT.ALS  
 COMMT kma37179  
 DATIM Sat Sep 03 17:36:01 2011  
 ONBUC LH  
 EXMOD NON  
 OBFREQ 399.65 MHz  
 OBSSET 124.00 KHz  
 OBFIN 10500.00 Hz  
 POINT 32768  
 FREQU 7992.01 Hz  
 SCANS 40  
 ACQTM 4.1001 sec  
 PD 2.9000 sec  
 PWI 5.80 usec  
 IRNUC 1H  
 CTEMP 24.5 c  
 SLVNT CDCL3  
 EXREF 0.00 ppm  
 BF 0.12 Hz  
 RGAIN 16

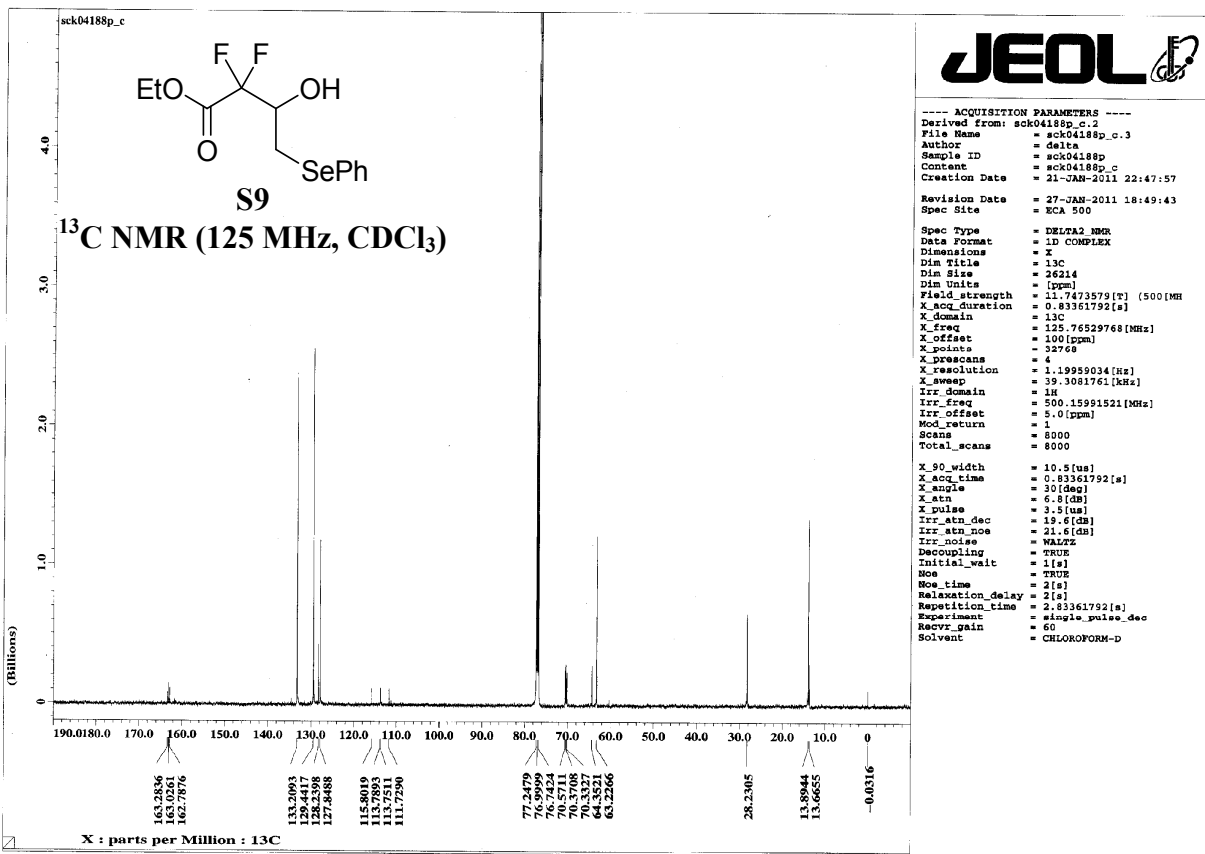

**JEOL**

----- ACQUISITION PARAMETERS -----  
 Derived from: sck04188p\_c.2  
 File Name = sck04188p\_c.3  
 Author = delta  
 Sample ID = sck04188p  
 Content = sck04188p\_c  
 Creation Date = 21-JAN-2011 22:47:57  
 Revision Date = 27-JAN-2011 18:49:43  
 Spec Site = ECA 500  
 Spec Type = DELTA2 NMR  
 Data Format = 1D COMPLEX  
 Dimensions = X  
 Dim Size = 26214  
 Dim Units = [ppm]  
 Field\_strength = 11.7473579 [T] (500[MH  
 X\_acq\_duration = 0.83361792[s]  
 X\_domain = 13C  
 X\_freq = 125.76529768[MHz]  
 X\_offset = 100[ppm]  
 X\_points = 32768  
 X\_prescans = 4  
 X\_resolution = 1.19959034 [Hz]  
 X\_sweep = 39.3081761 [kHz]  
 Irr\_domain = 1H  
 Irr\_freq = 500.15991521 [MHz]  
 Irr\_offset = 5.0 [ppm]  
 Mod\_return = 1  
 Scans = 8000  
 Total\_scans = 8000  
 X\_90\_width = 10.5[us]  
 X\_acq\_time = 0.83361792[s]  
 X\_angle = 20[deg]  
 X\_atn = 6.5[dB]  
 X\_pulse = 3.5[us]  
 Irr\_atn\_dec = 19.8[dB]  
 Irr\_atn\_poe = 21.6[dB]  
 Irr\_noise = WALZ  
 Decoupling = TRUE  
 Initial\_wait = [s]  
 Noe = TRUE  
 Noe\_time = 2[s]  
 Relaxation\_delay = 2[s]  
 Repetition\_time = 2.83361792[s]  
 Experiment = single\_pulse\_dec  
 Recv\_gain = 60  
 Solvent = CHLOROFORM-D

C:\WINNMR98\COMMON\\_DEFAULT.ALS  
 kma37184

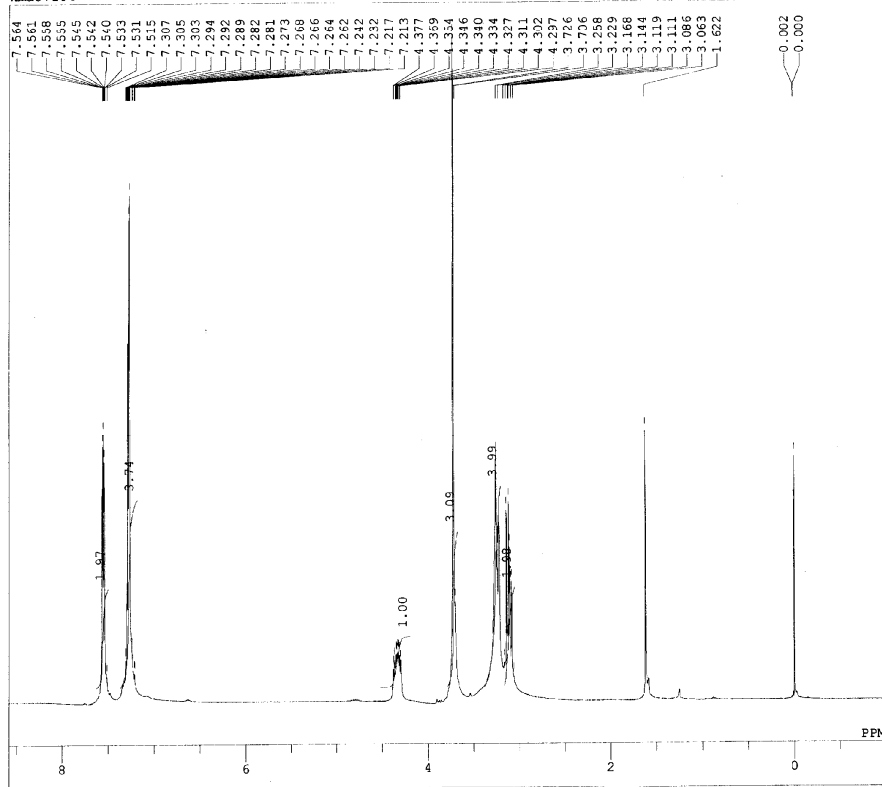

DFILE C:\WINNMR98\COMMON\\_DEFAULT.AI  
 COMNT kma37184  
 DATIM Sat Sep 10 08:50:09 2011  
 OBNUC 1H  
 EXMOD NON  
 OBFREQ 399.65 MHz  
 OBSETE 124.00 KHz  
 OBFIN 10500.00 Hz  
 POINT 32768  
 FREQU 7992.01 Hz  
 SCANS 40  
 ACQTM 4.1001 sec  
 PD 2.9000 sec  
 PW1 5.80 usec  
 IRNUC 1H  
 CTEMP 24.5 c  
 SILVNT CDCL3  
 EXREF 0.00 ppm  
 BF 0.12 Hz  
 RGAIN 14

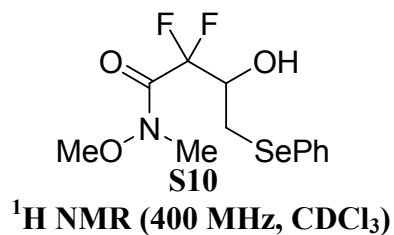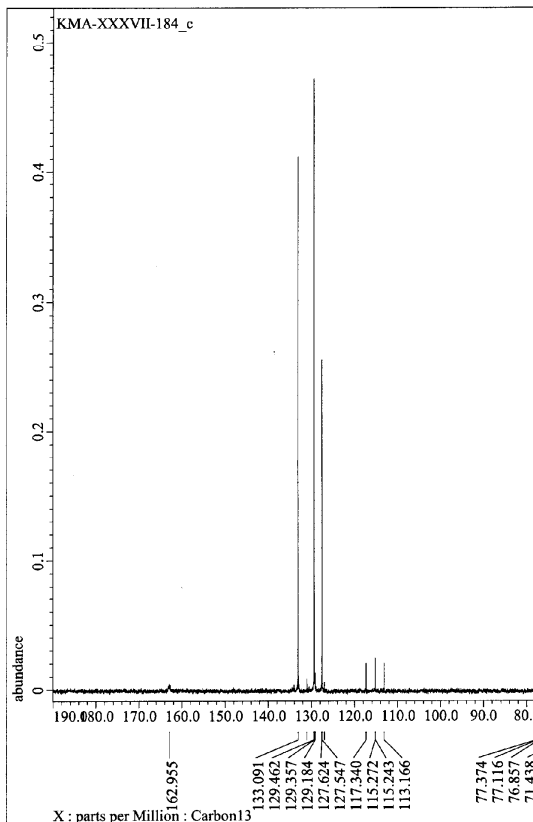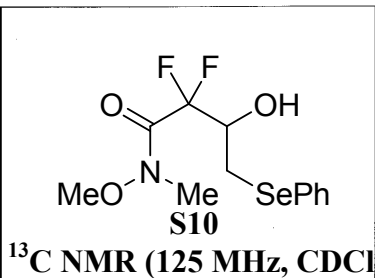

**JEOL**

---- PROCESSING PARAMETERS ----  
 dc\_balance( 0, FALSE )  
 sseep( 2.0[Hz], 0.0[s] )  
 irregrid( 0[%], 0[%], 80[%], 100[%] )  
 zerofill( 1 )  
 fft( 1, TRUE, TRUE )  
 ppm  
 phase( 189.44999, 191.19951, 59.00889[%] )  
 以下は由来: KMA-XXXVII-184\_c-1-1.jdf

filename = C:\Users\delta\Documents\U  
 anchor = delta  
 Experiment = single\_pulse\_dec.jpg  
 Sample\_id = KMA-XXXVII-184  
 Solvent = CHLOROFORM-D  
 Creation\_Time = 14-SEP-2011 15:31:18  
 Revision\_Time = 15-SEP-2011 16:18:58  
 Current\_Time = 15-SEP-2011 16:22:18

Comment = KMA-XXXVII-184\_c  
 Data\_Format = 1D COMPLEX  
 Dim\_Base = 26214  
 Dim\_Title = Carbon13  
 Dim\_Units = [ppm]  
 Dimensions = 2  
 Site = JNM-EX500  
 Spectrometer = DELTA2-NMR

Field\_Strength = 11.62926421[T] (500[MHz])  
 X\_Acq\_Duration = 0.8388608[s]  
 X\_Domain = 13C  
 X\_Freq = 125.5010059[MHz]  
 X\_Offset = 100[ppm]  
 X\_Points = 32768  
 X\_Prescans = 4  
 X\_Resolution = 1.1920929[Hz]  
 X\_Sweep = 39.0625[kHz]  
 X\_Sweep\_Clipped = 31.25[kHz]  
 Irr\_Domain = Proton  
 Irr\_Freq = 495.13191398[MHz]  
 Irr\_Offset = 5[ppm]  
 Clipped = TRUE  
 Scans = 10000  
 Total\_Scans = 10000

Relaxation\_Delay = 2[s]  
 Recvr\_Gain = 60  
 Temp\_Gct = 24.3[deg]  
 X\_90\_Width = 8.5[us]  
 X\_Acq\_Time = 0.8388608[s]  
 X\_Angle = 30[deg]  
 X\_Ats = 4.4[ds]  
 X\_Pulse = 4.8333333[us]  
 Irr\_Atn\_Dec = 22.735[ds]  
 Irr\_Atn\_Moe = 22.735[ds]  
 Irr\_Noise = WAVE  
 Irr\_Width = 82[us]  
 Decoupling = TRUE

C:\WINNMR98\COMMON\_DEFAULT.ALS  
 kma38001

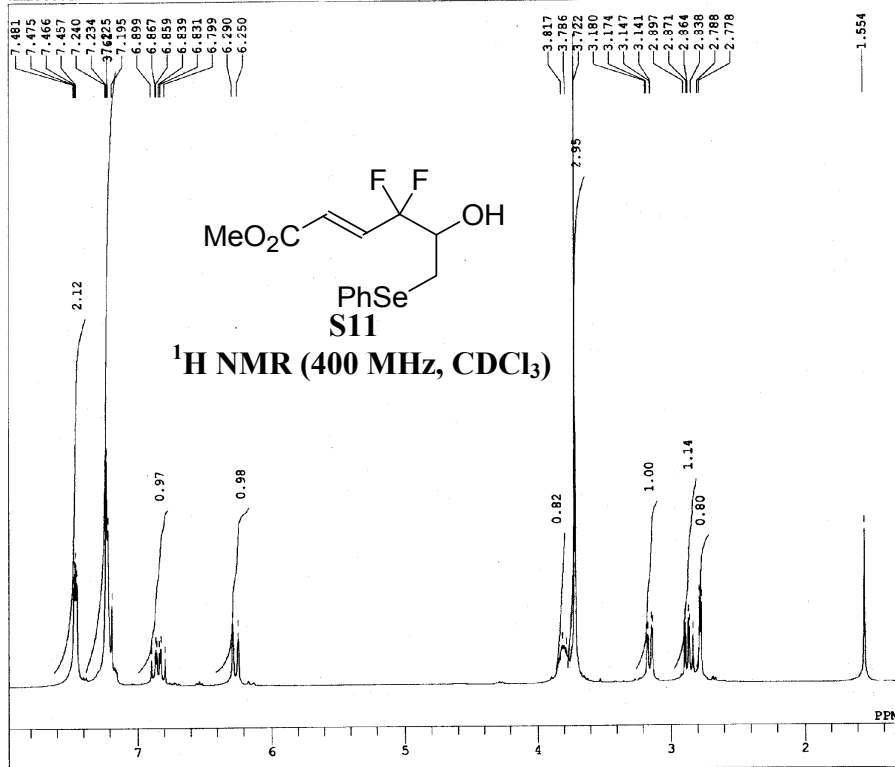

DFILE C:\WINNMR98\COMMON\_DEFAULT.ALS  
 COMMT kma38001  
 DRITM MON Sep 26 09:26:08 2011  
 OBNUC 1H  
 EXMOD NON  
 OBFREQ 399.65 MHz  
 OBSSET 124.00 KHz  
 OBFIN 10500.00 Hz  
 POINT 32768  
 FREQU 7992.01 Hz  
 SCANS 80  
 ACOTM 4.1001 sec  
 PD 2.9000 sec  
 FW1 5.80 usec  
 IRNUC 1H  
 CTEMP 24.5 c  
 SLVNT CDCL3  
 EXREF 7.24 ppm  
 BF 1.00 Hz  
 RGAIN 14

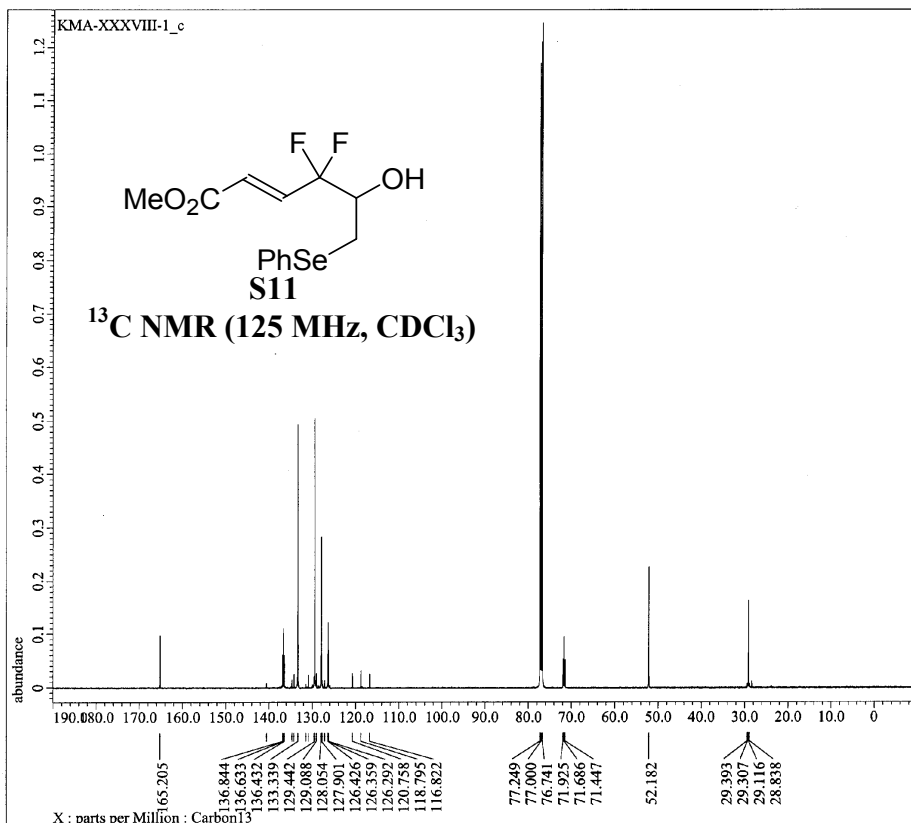

**JEOL**

--- PROCESSING PARAMETERS ---  
 dc\_balance( 0, FALSE )  
 swp( 2.0[Hz], 0.0[s] )  
 trapezoid( 0[%], 0[%], 80[%], 100[%] )  
 sincfill( 1 )  
 fzt( 1, TRUE, TRUE )  
 ppm  
 phase( 195.65013, 191.18851, 59.37512[Hz] )  
 以下に由来: KMA-XXXVIII-1\_c-1-1.jdf

Filename = C:\Users\delta\Documents\W  
 Author = delta  
 Experiment = single\_pulse\_desc.jp  
 Sample\_id = KMA-XXXVIII-1  
 Solvent = CHLOROFORM-D  
 Creation\_Time = 1-OCT-2011 11:34:48  
 Revision\_Time = 3-OCT-2011 15:54:01  
 Current\_Time = 3-OCT-2011 15:55:52

Comment = KMA-XXXVIII-1\_c  
 Data\_Format = 1D COMPLEX  
 Dim\_size = 26214  
 Dim\_title = Carbon13  
 Dim\_units = [ppm]  
 Dimensions = X  
 Site = JNM-EX300  
 Spectrometer = DELTA\_2\_NMR

Field\_Strength = 11.62926421[T] (500[MHz])  
 X.Acq\_Duration = 0.8388608[s]  
 X.Domain = 13c  
 X.Freq = 124.5010059[MHz]  
 X.Offset = 100[ppm]  
 X.Points = 32768  
 X.Prescans = 4  
 X.Resolution = 1.1920939[Hz]  
 X.Sweep = 39.0625[Hz]  
 X.Sweep\_Clipped = 31.25[KHz]  
 Irr\_Domain = Proton  
 Irr.Freq = 499.13191399[MHz]  
 Irr.Offset = 5[ppm]  
 Clipped = FALSE  
 Scans = 20000  
 Total\_Scans = 20000

Relaxation\_Delay = 2[s]  
 Recv\_Gain = 60  
 Temp\_Get = 23.9[dc]  
 X\_90\_Width = 8.5[us]  
 X.Acq\_Time = 0.8388608[s]  
 X.Angle = 30[deg]  
 X.Attn = 4.5[db]  
 X.Pulse = 2.9333333[us]  
 Irr\_Atn\_Dec = 22.735[db]  
 Irr\_Atn\_Noise = 22.735[db]  
 Irr.Noise = WALTZ  
 Irr.Pulse = 92[us]  
 Decoupling = TRUE



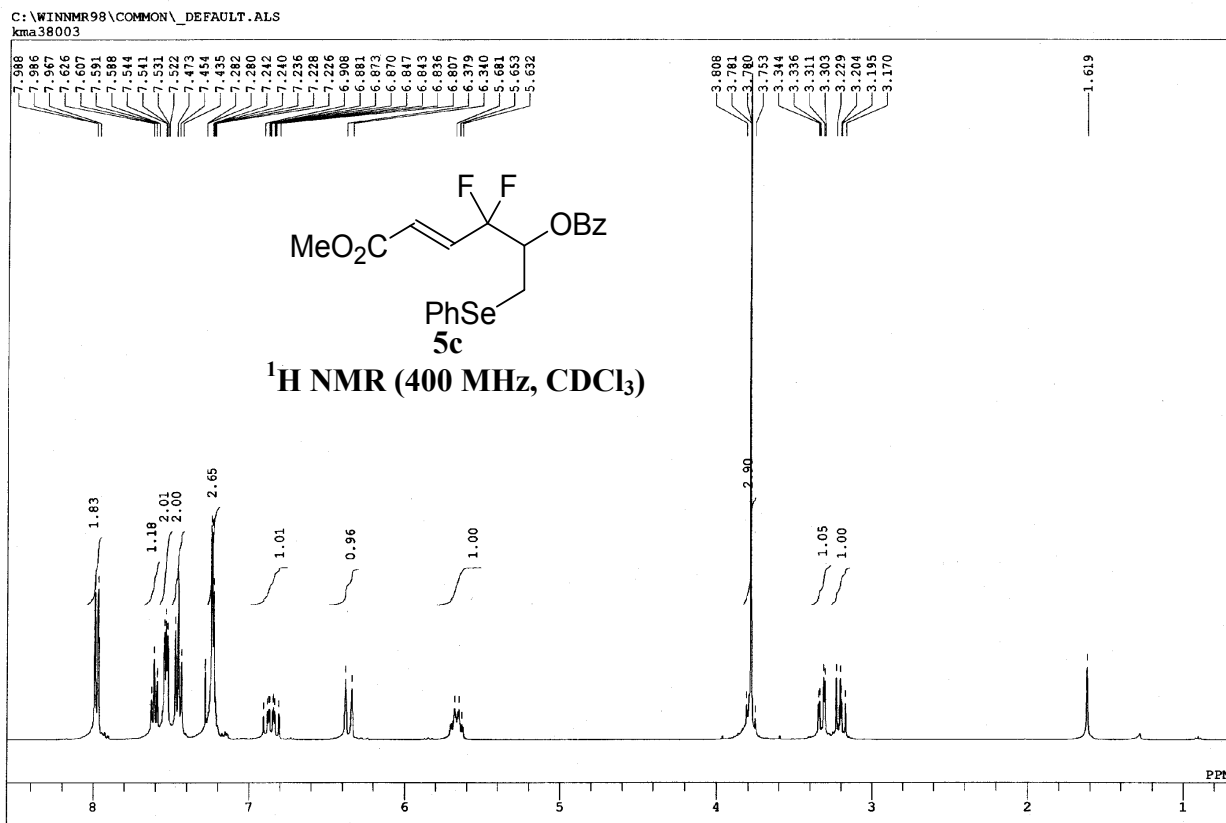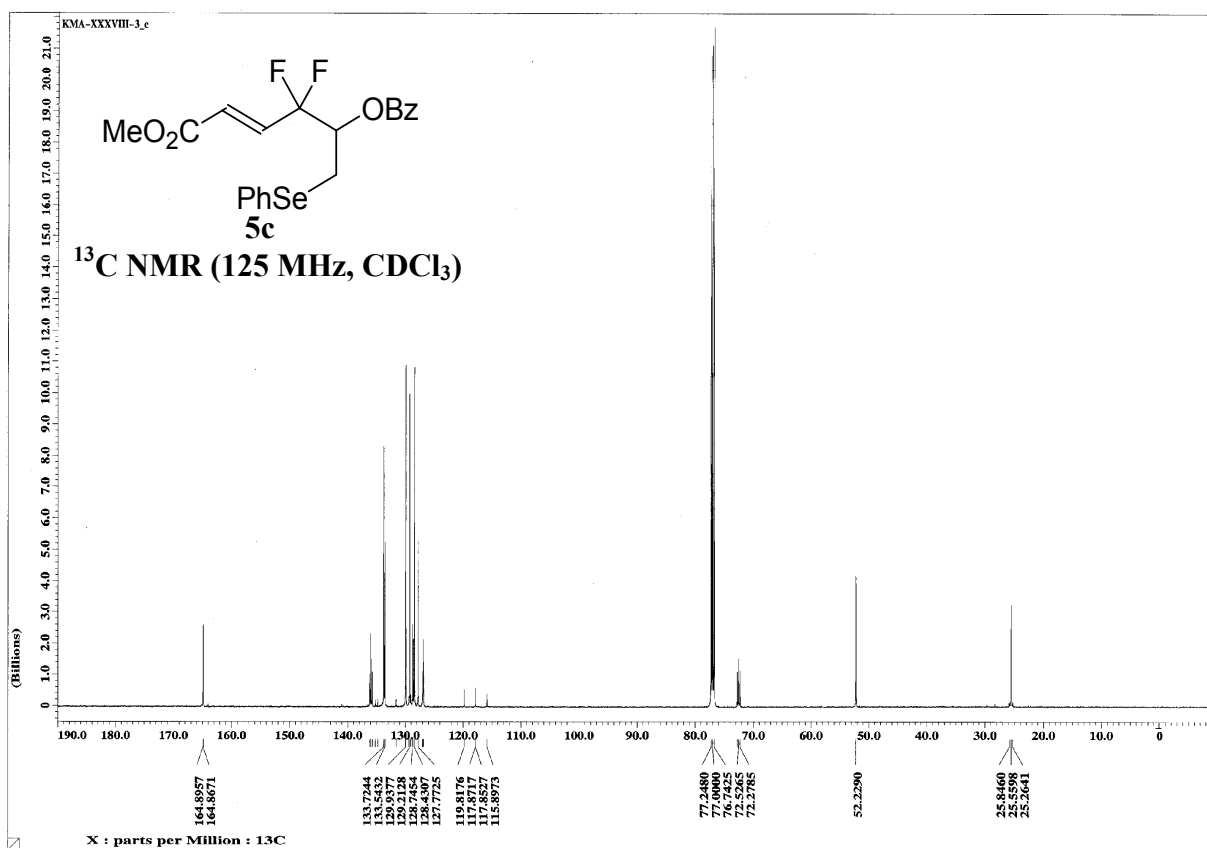

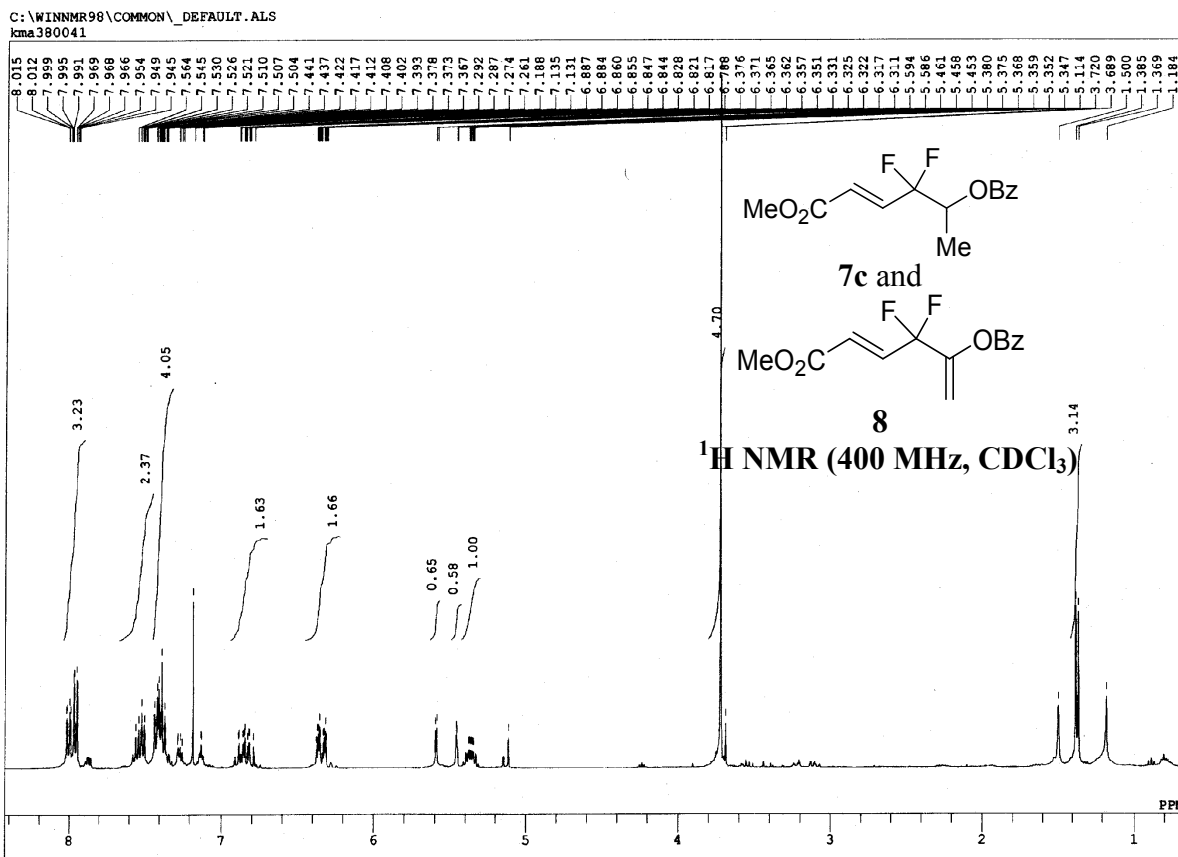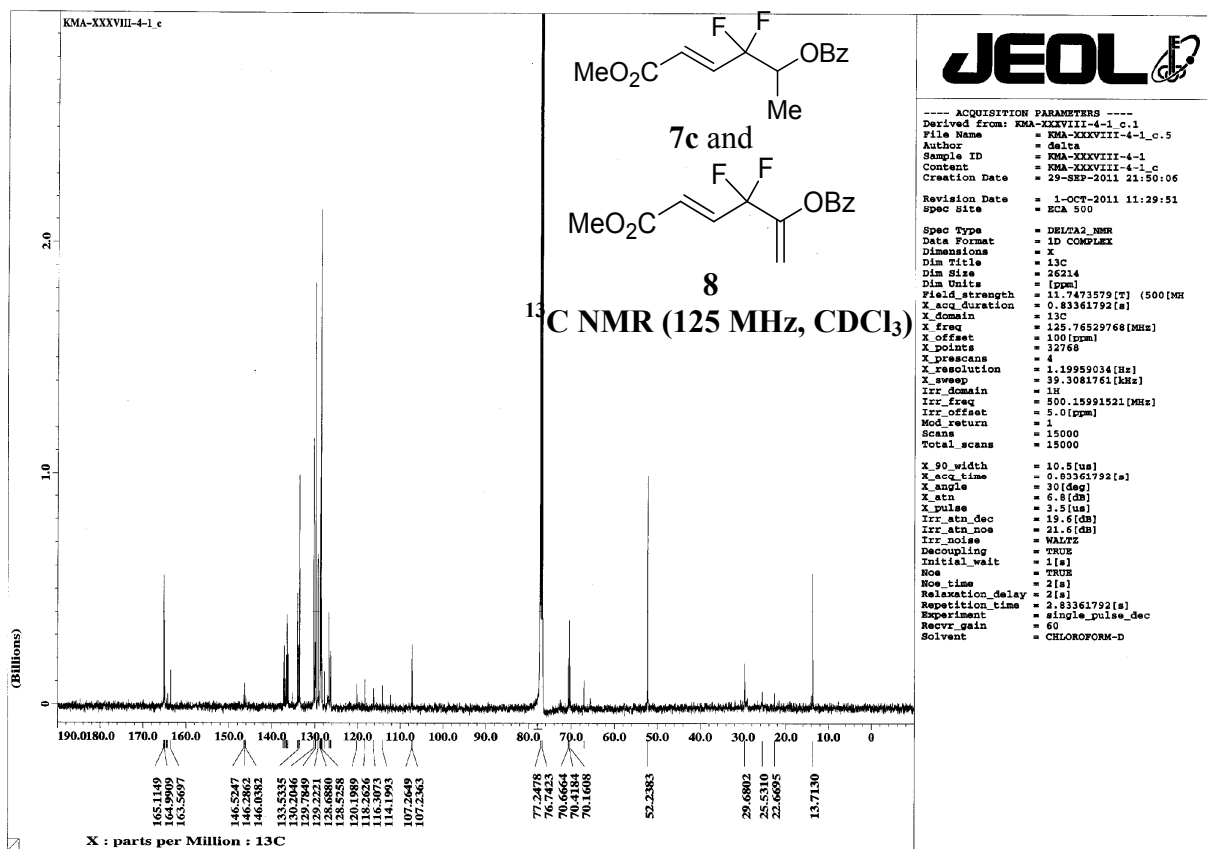

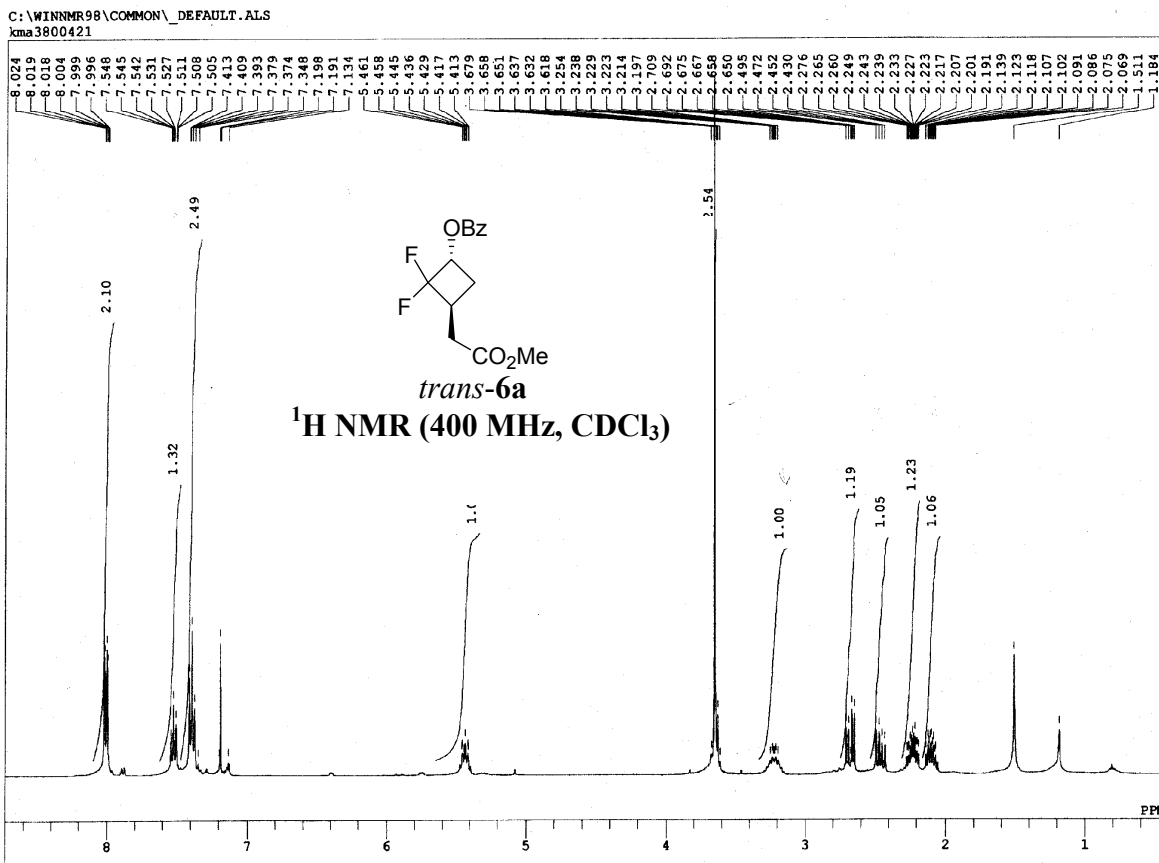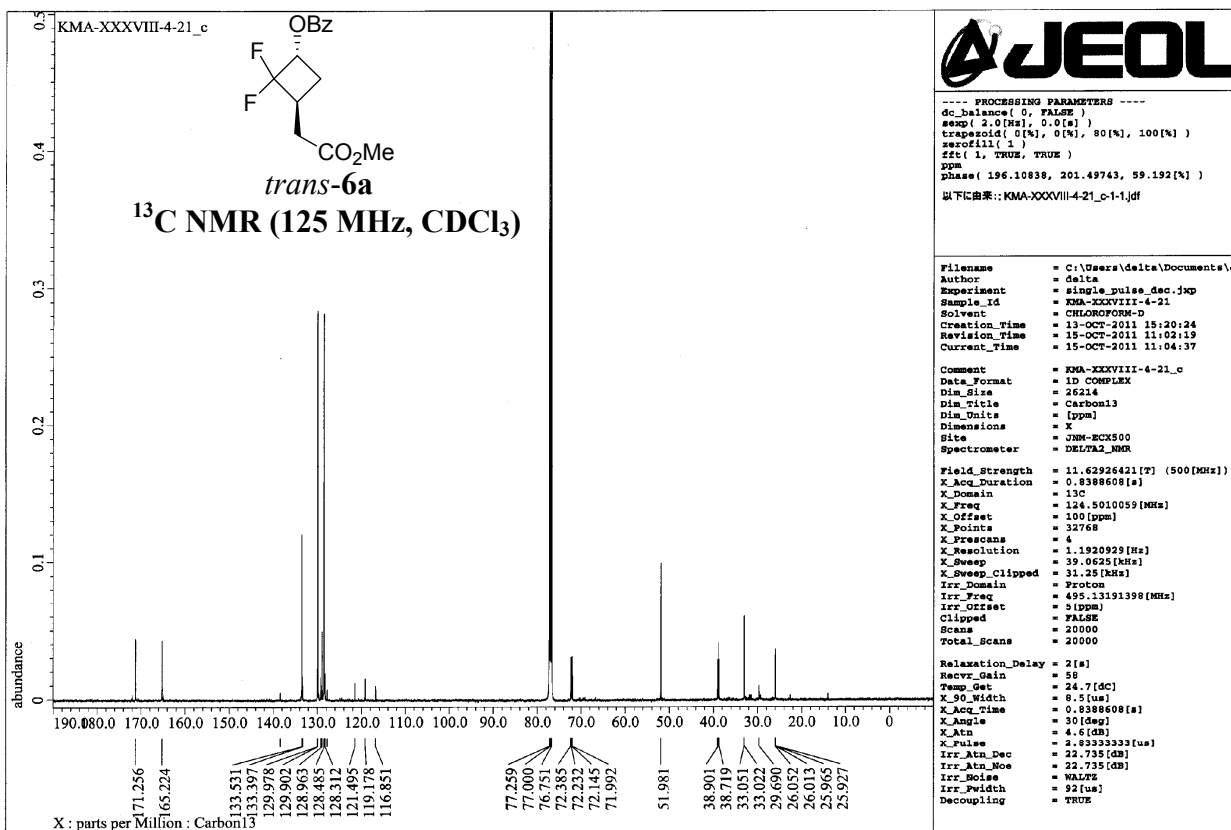

C:\WINNMR98\COMMON\\_DEFAULT.ALS  
 kma38002

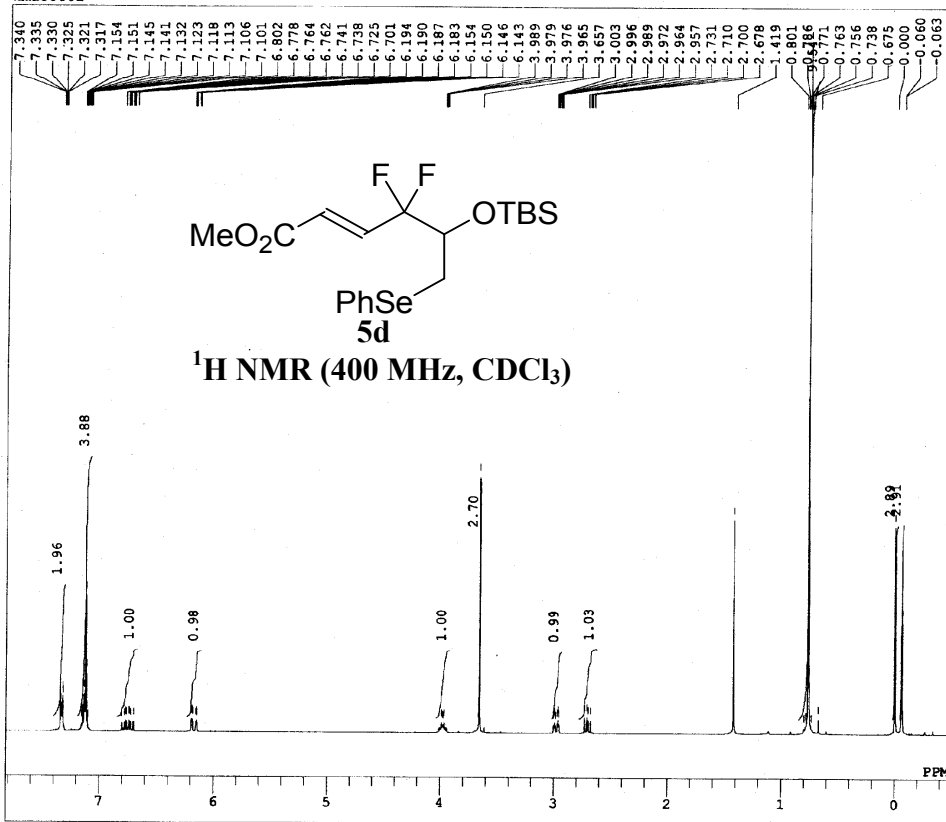

DFILE C:\WINNMR98\COMMON\\_DEFAULT.ALS  
 COMNT kma38002  
 DATIM Fri Sep 30 09:34:31 2011  
 OBNUC 1H  
 EXMOD NON  
 OBFREQ 399.65 MHz  
 OBSET 124.00 KHz  
 OBFIN 10500.00 Hz  
 POINT 32768  
 FREQU 7992.01 Hz  
 SCANS 40  
 ACQTM 4.1001 sec  
 PD 2.9000 sec  
 PW1 5.80 usec  
 IRNUC 1H  
 CTEMP 23.9 c  
 SLVNT CDCL3  
 EXREF 0.00 ppm  
 BF 0.12 Hz  
 RGAIN 16

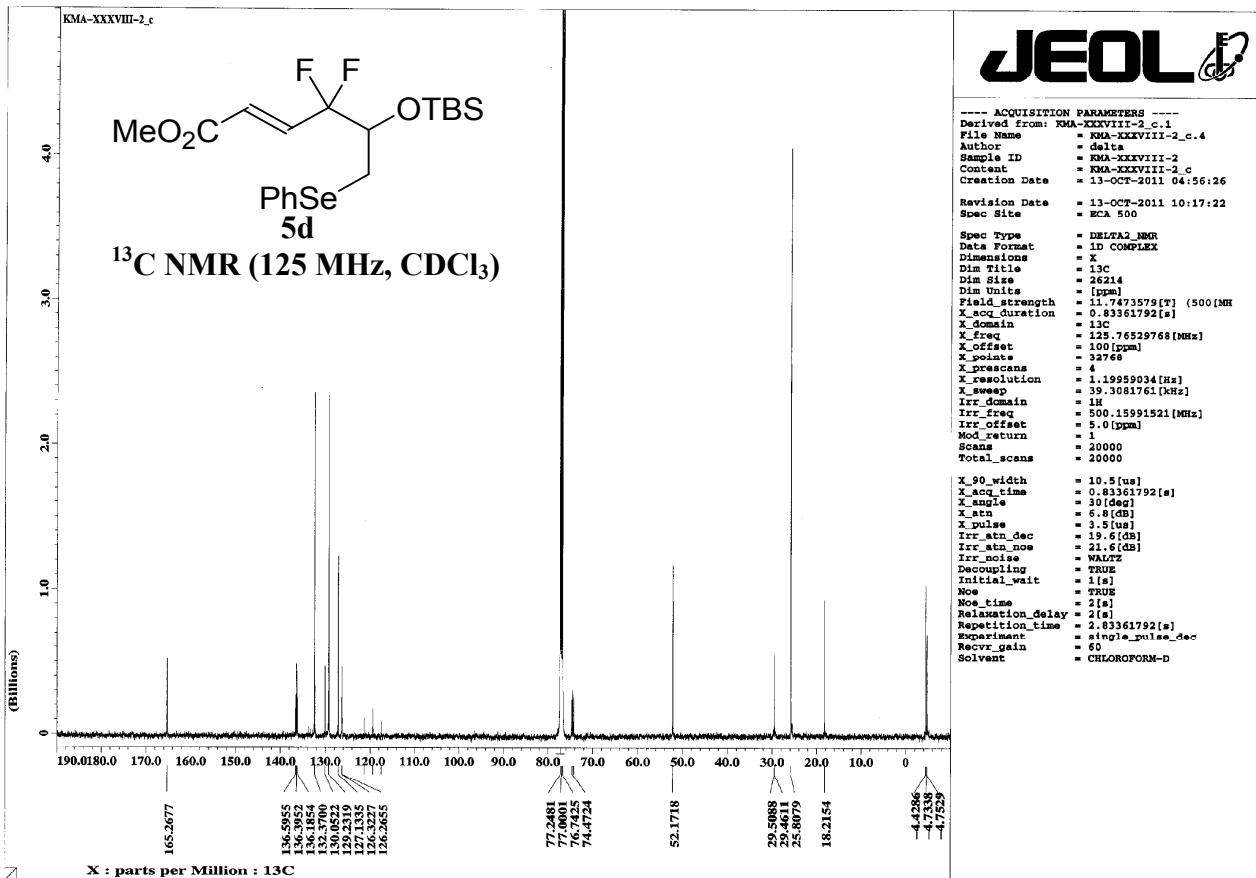

**JEOL**

--- ACQUISITION PARAMETERS ---  
 Derived from: KMA-XXXVIII-2.c.1  
 File Name = KMA-XXXVIII-2.c.4  
 Author = delta  
 Sample ID = KMA-XXXVIII-2  
 Contact = KMA-XXXVIII-2.c  
 Creation Date = 13-OCT-2011 04:56:26  
 Revision Date = 13-OCT-2011 10:17:22  
 Spec Site = RCA 500  
 Spec Type = DELTA2\_NMR  
 Data Format = 1D\_COMPLEX  
 Dimensions = X  
 Dim Title = 13C  
 Dim Size = 26214  
 Dim Units = [ppm]  
 Field\_strength = 11.7473579 [T] (500 [MH])  
 X\_acq\_duration = 0.83361792 [s]  
 X\_domain = 13C  
 X\_freq = 125.76529768 [MHz]  
 X\_offset = 100 [ppm]  
 X\_points = 32768  
 X\_prescans = 4  
 X\_resolution = 1.19959034 [Hz]  
 X\_sweep = 39.3081761 [kHz]  
 Irr\_domain = 1H  
 Irr\_freq = 500.15991521 [MHz]  
 Irr\_offset = 5.0 [ppm]  
 Mod\_return = 1  
 Scans = 20000  
 Total\_scans = 20000  
 X\_90\_width = 10.5 [us]  
 X\_acq\_time = 0.83361792 [s]  
 X\_angle = 30 [deg]  
 X\_atn = 6.8 [dB]  
 X\_pulse = 3.5 [us]  
 Irr\_atn\_dec = 19.6 [dB]  
 Irr\_atn\_noe = 21.6 [dB]  
 Irr\_noise = WALTZ  
 Decoupling = TRUE  
 Initial\_wait = 1 [s]  
 Noe\_time = TRUE  
 Relaxation\_delay = 2 [s]  
 Repetition\_time = 2.83361792 [s]  
 Experiment = stp1a\_pulse\_dec  
 Recvr\_gain = 60  
 Solvent = CHLOROFORM-D

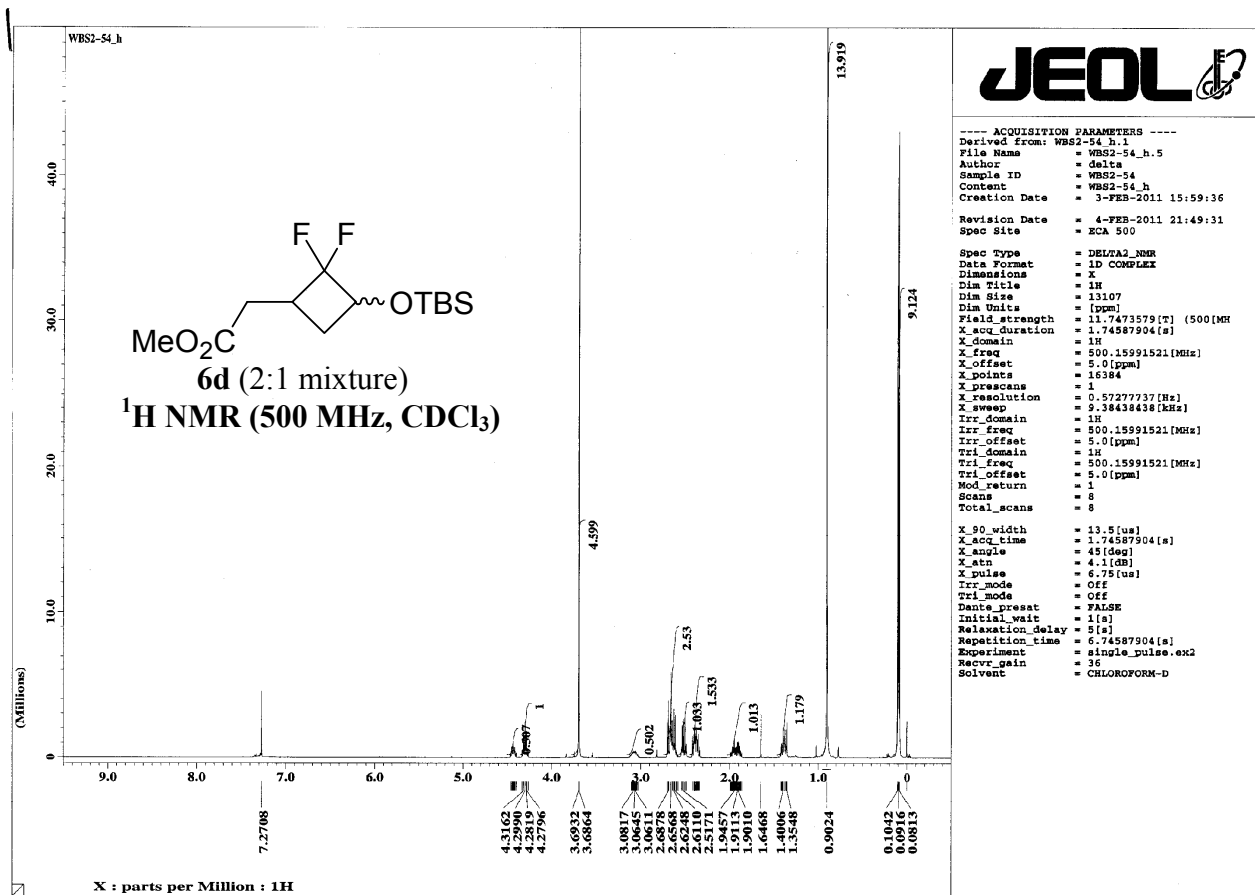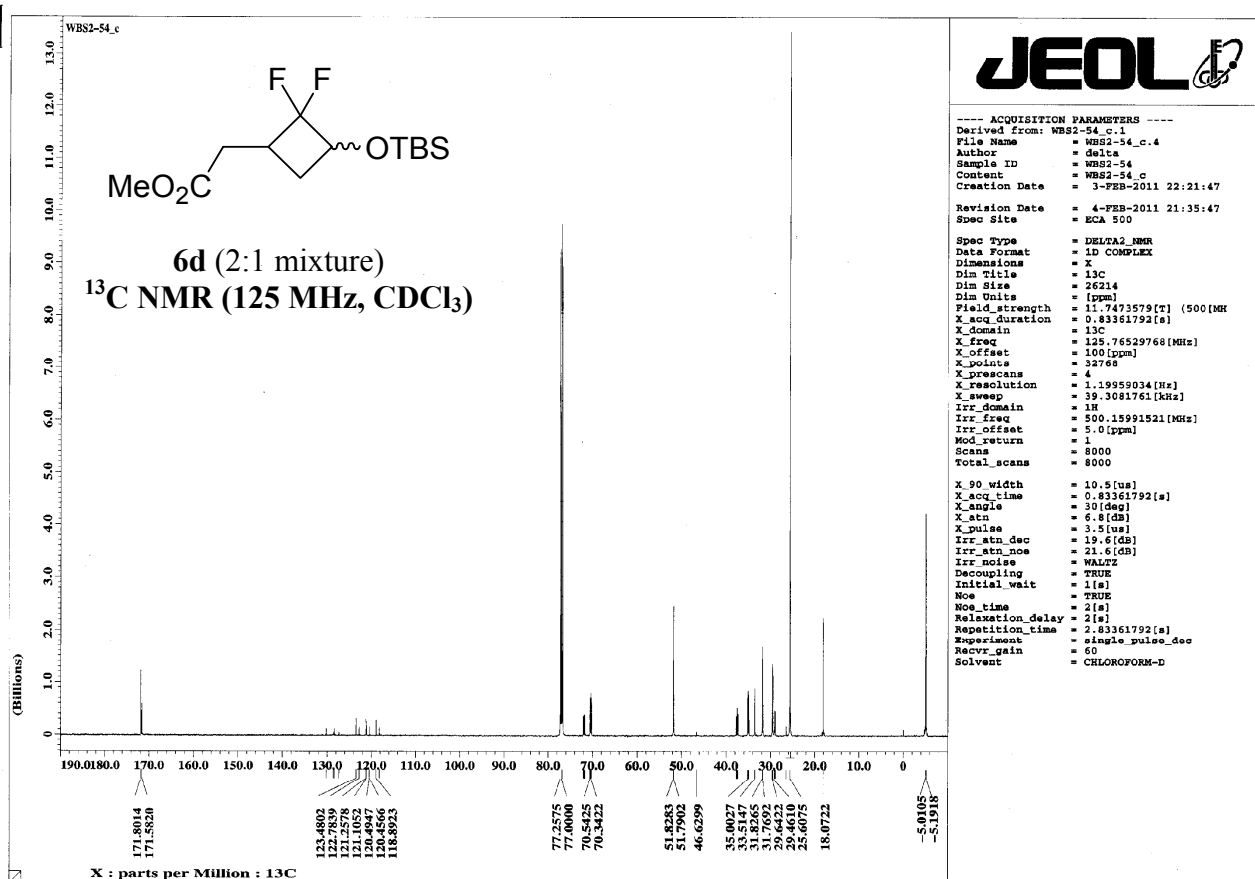

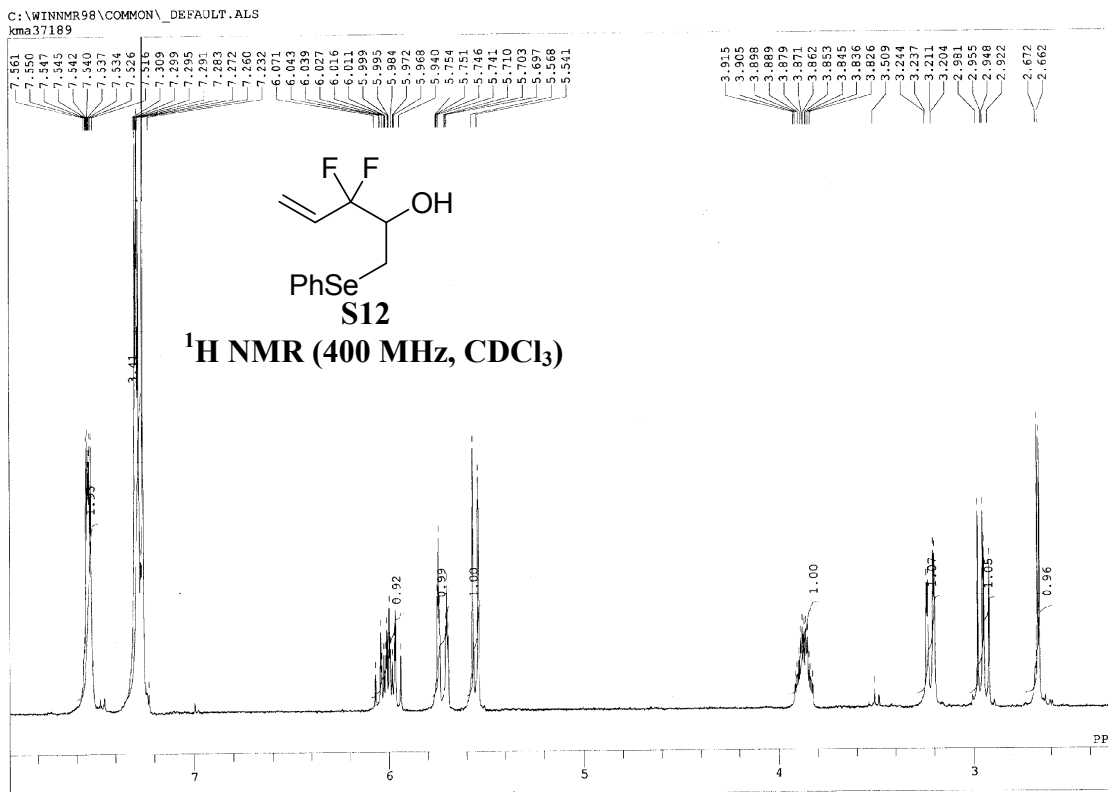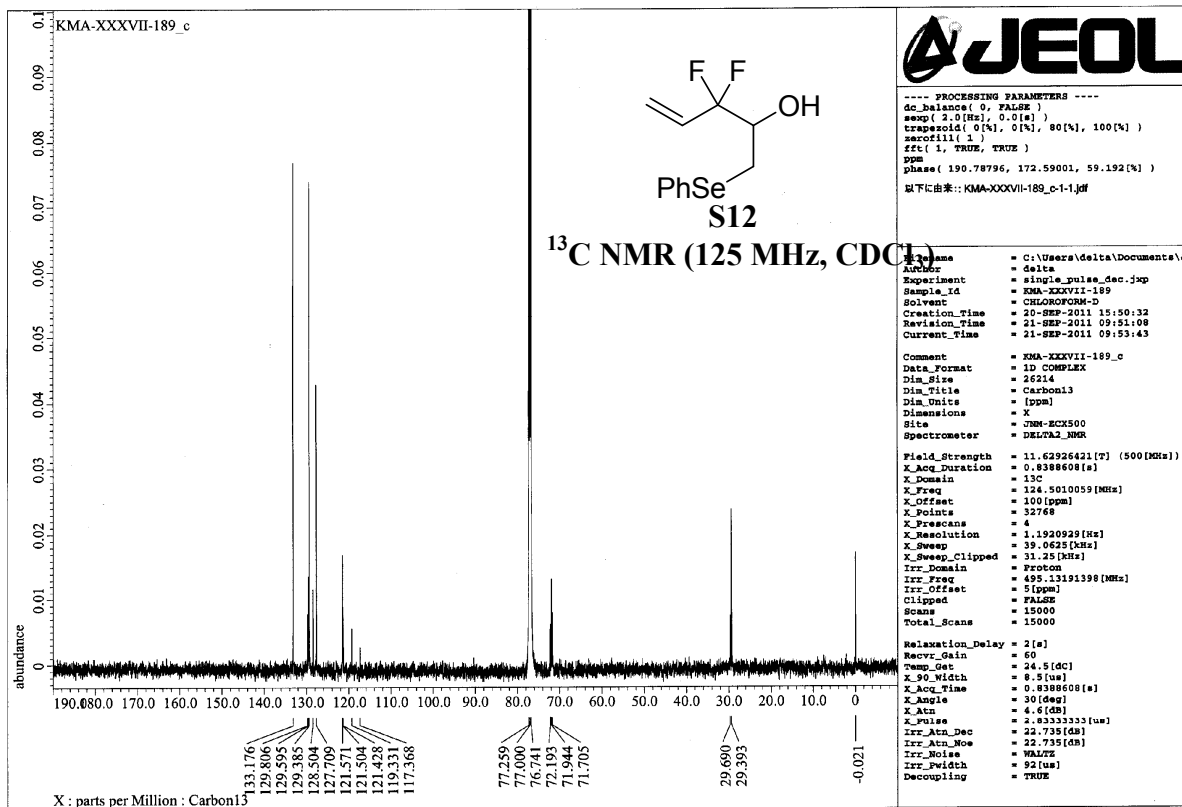





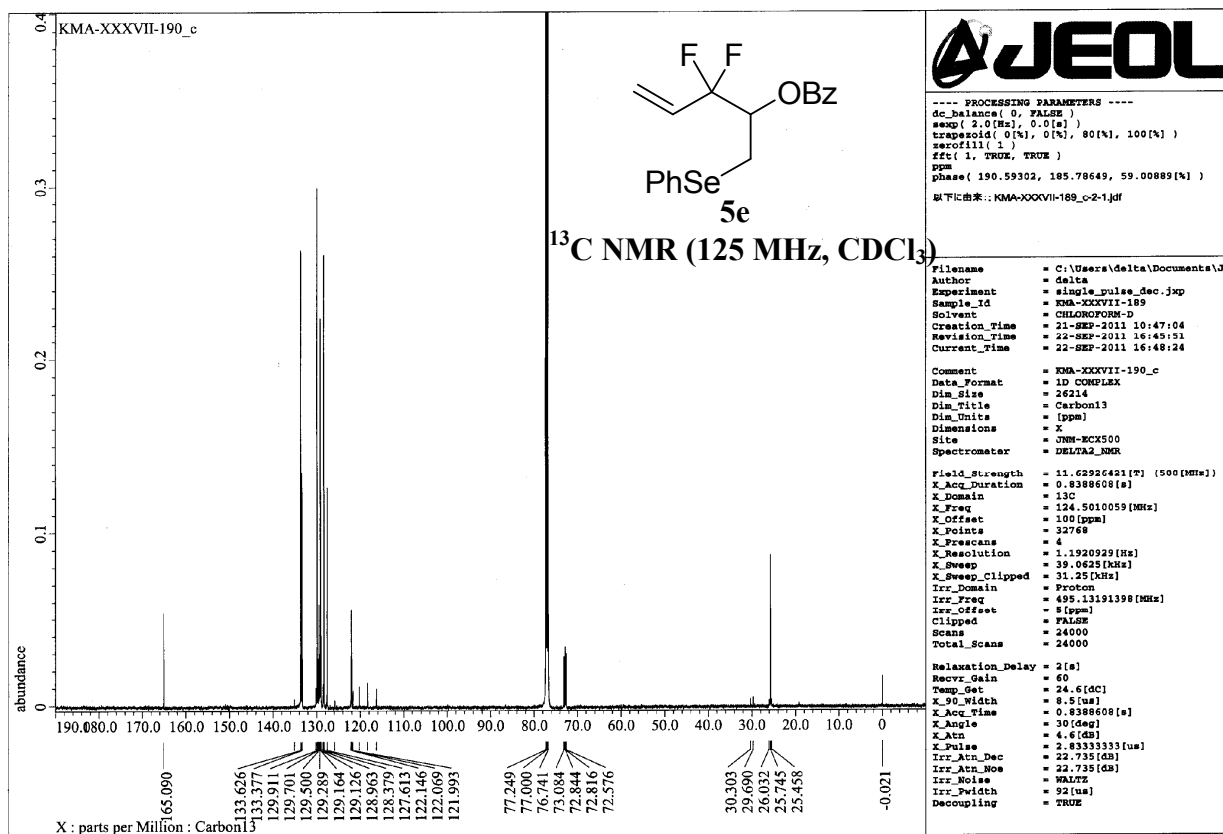

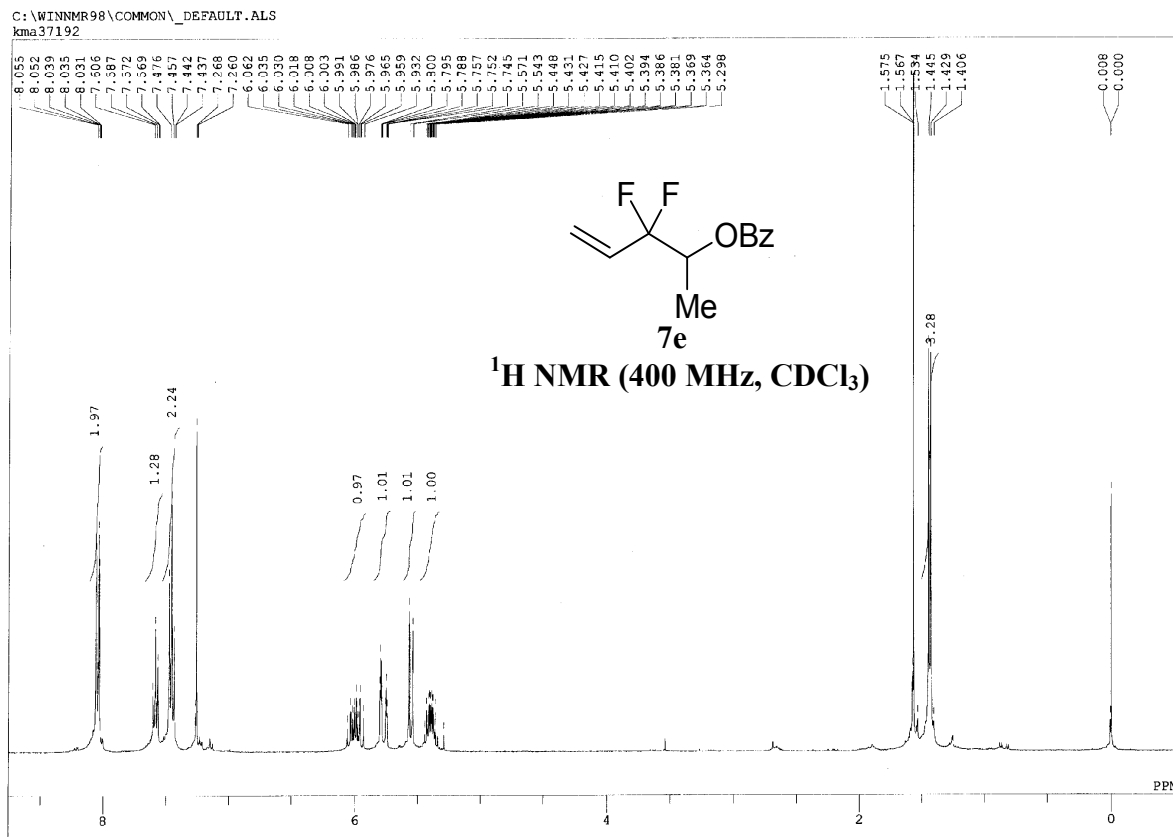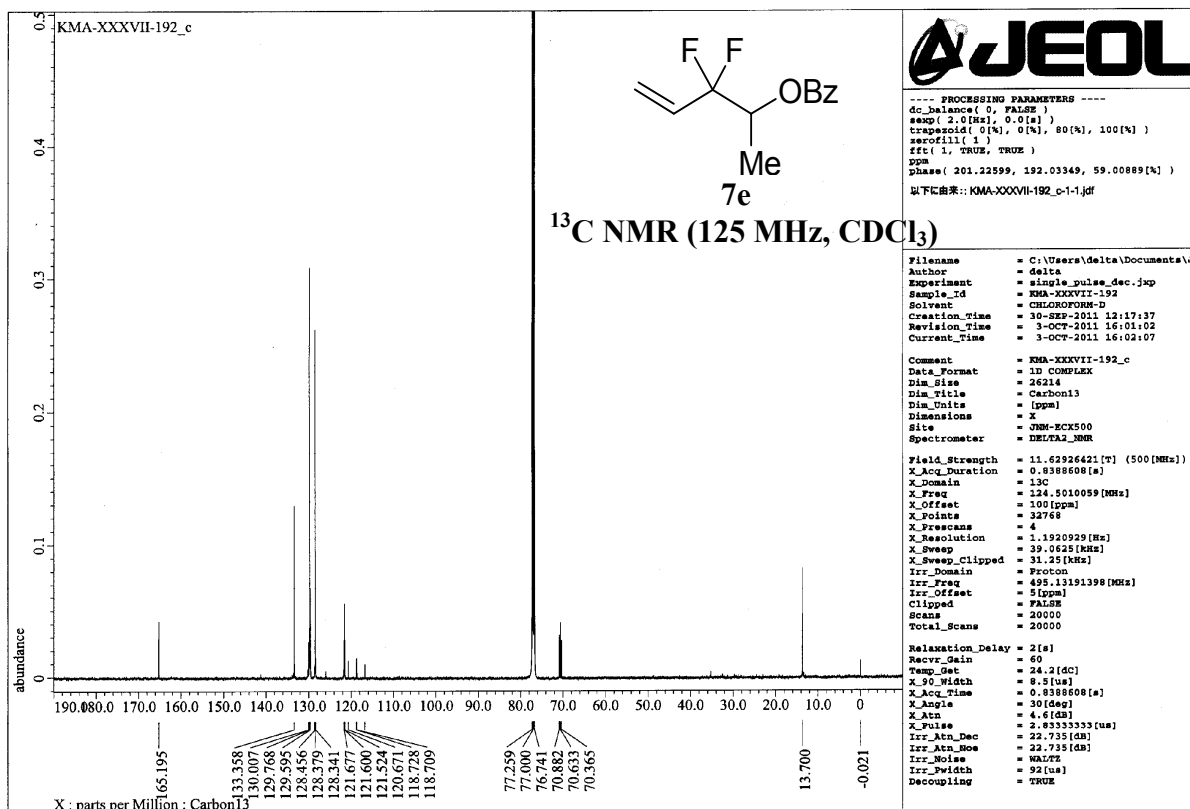

C:\WINNMR98\COMMON\\_DEFAULT.ALS  
 kma37178

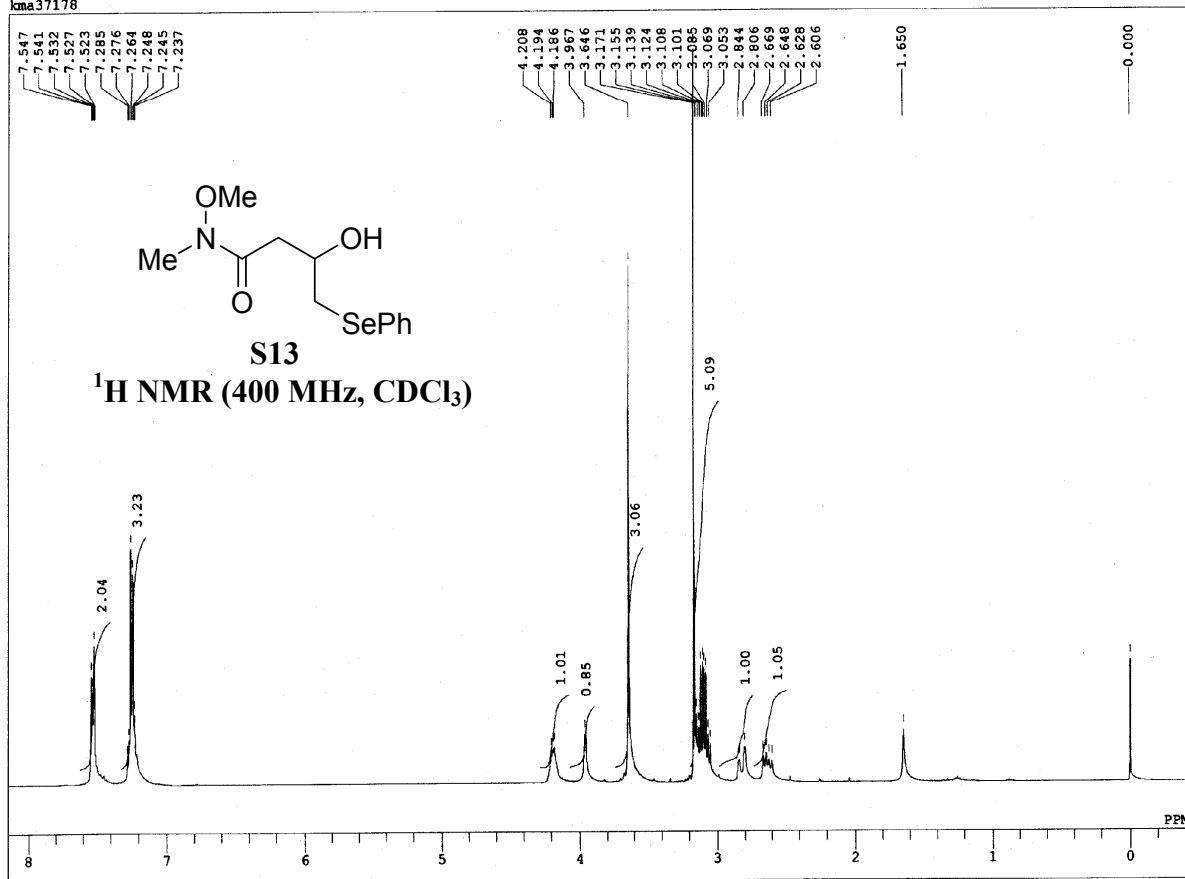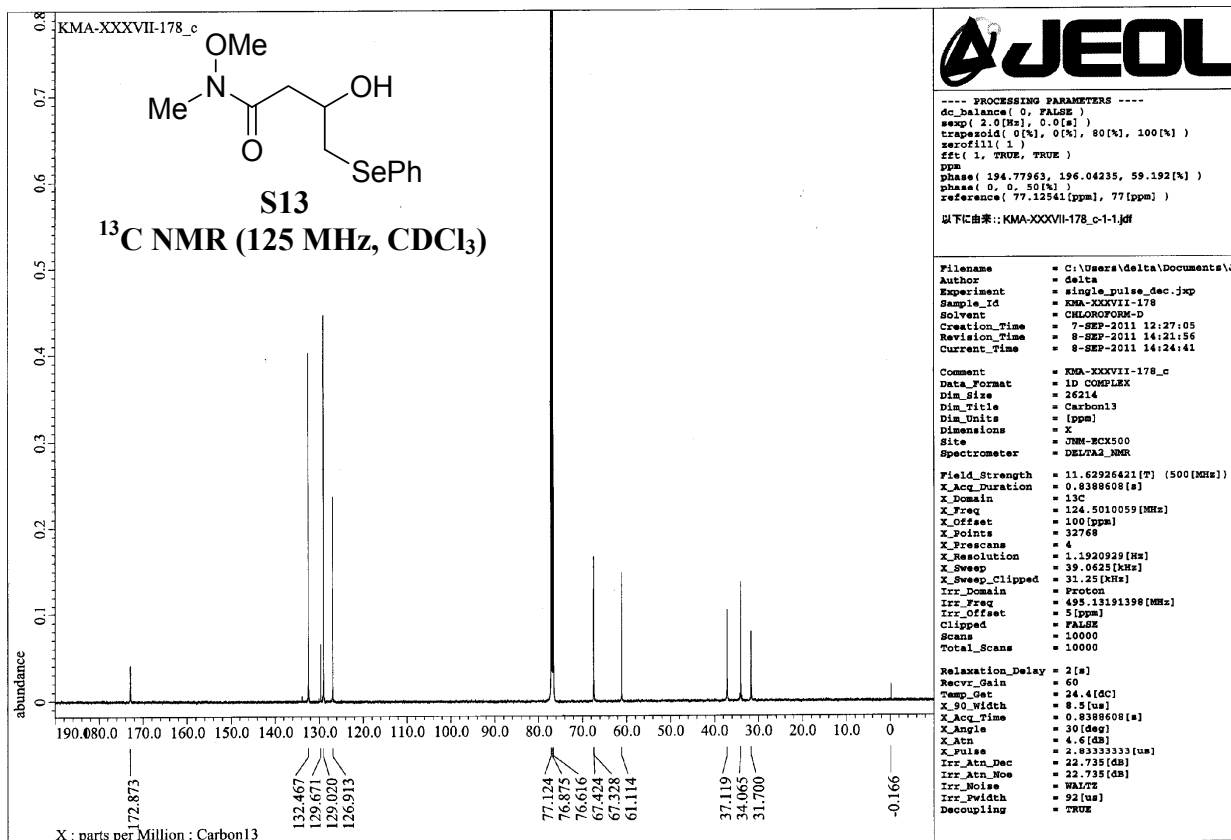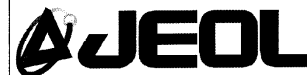

--- PROCESSING PARAMETERS ---  
 dc\_balance( 0, FALSE )  
 smp( 2.0 [Hz], 0.0 [s] )  
 trapacid( 0 [Hz], 0 [Hz], 80 [Hz], 100 [Hz] )  
 seqfill( 1 )  
 est( 1, TRUE, TRUE )  
 ppm  
 phase( 194.77963, 196.04235, 59.192 [Hz] )  
 phase( 0, 0, 50 [Hz] )  
 reference( 77.12541 [ppm], 77 [ppm] )  
 以下に由来: KMA-XXXVII-178\_c-1-1.jf

Filename = C:\Users\delta\Documents\J  
 Author = delta  
 Experiment = single\_pulse\_dec.jpg  
 Sample\_Id = KMA-XXXVII-178  
 Solvent = CHLOROFORM-D  
 Creation\_Time = 7-SEP-2011 12:27:05  
 Revision\_Time = 8-SEP-2011 14:21:56  
 Current\_Time = 8-SEP-2011 14:24:41

Comment = KMA-XXXVII-178\_c  
 Data\_Format = 1D COMPLEX  
 Dim\_Size = 26214  
 Dim\_Title = Carbon13  
 Dim\_Units = [ppm]  
 Dimensions = X  
 Site = JNM-EX500  
 Spectrometer = DELTA2\_NMR  
 Field\_Strength = 11.62926421 [T] (500 [MHz])  
 X\_Acq\_Duration = 0.8388608 [s]  
 X\_Domain = 13C  
 X\_Freq = 124.5010059 [MHz]  
 X\_Offset = 100 [ppm]  
 X\_Points = 32768  
 X\_Prescans = 4  
 X\_Resolution = 1.1920929 [Hz]  
 X\_Sweep = 39.0625 [kHz]  
 X\_Sweep\_Clippped = 31.25 [kHz]  
 Irr\_Domain = Proton  
 Irr\_Freq = 499.13191398 [MHz]  
 Irr\_Offset = 5 [ppm]  
 Clipped = FALSE  
 Scans = 10000  
 Total\_Scans = 10000

Relaxation\_Delay = 2 [s]  
 Recvr\_Gain = 60  
 Temp\_Get = 24.4 [dC]  
 X\_90\_Width = 8.3 [us]  
 X\_Acq\_Time = 0.8388608 [s]  
 X\_Angle = 30 [deg]  
 X\_Atn = 4.6 [dB]  
 X\_Pulse = 2.8333333 [us]  
 Irr\_Atn\_Dec = 22.735 [dB]  
 Irr\_Atn\_Noise = 22.735 [dB]  
 Irr\_Noise = WALTZ  
 Irr\_Pwidth = 92 [us]  
 Decoupling = TRUE

X: parts per Million : Carbon13

C:\WINNMR98\COMMON\\_DEFAULT.ALS  
 kma37186

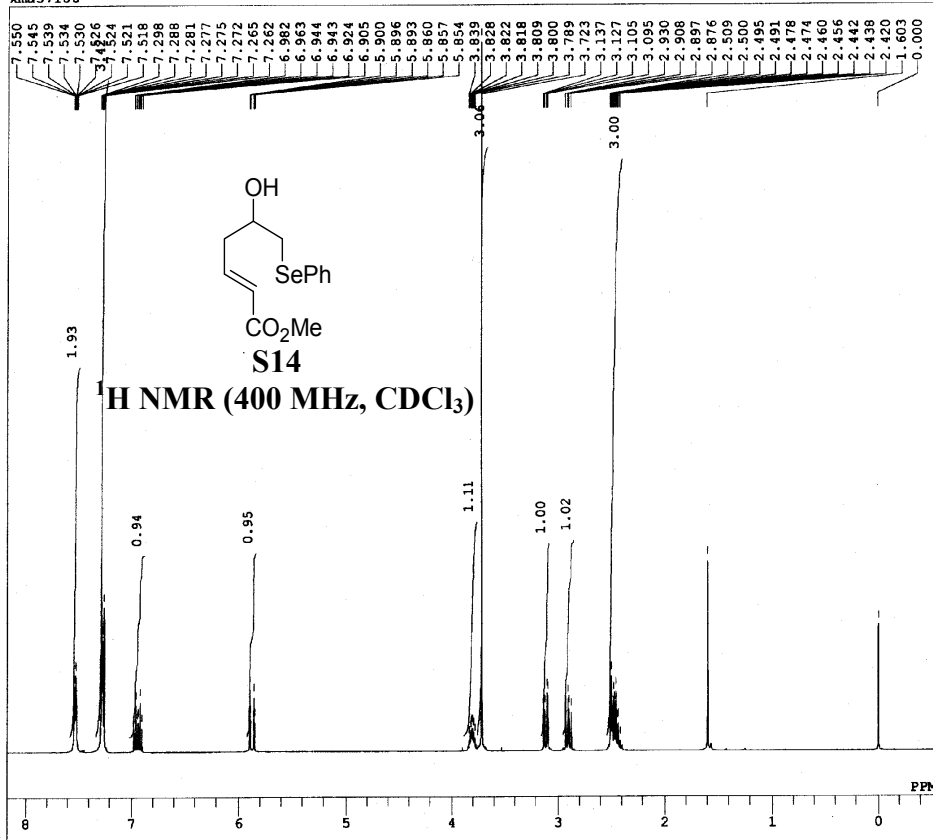

DFILE C:\WINNMR98\COMMON\\_DEFAULT.ALS  
 COMNT kma37186  
 DATIM Mon Sep 12 09:08:19 2011  
 OBNUC 1H  
 EXMOD NON  
 OBFRQ 399.65 MHz  
 OBSET 124.00 KHz  
 OBFIN 10500.00 Hz  
 POINT 32768  
 FREQU 7992.01 Hz  
 SCANS 40  
 ACQTM 4.1001 sec  
 PD 2.9000 sec  
 PW1 5.80 usec  
 IRNUC 1H  
 CTEMP 24.5 c  
 SLVNT CDCL3  
 EXREF 0.00 ppm  
 BF 0.12 Hz  
 RGAIN 15

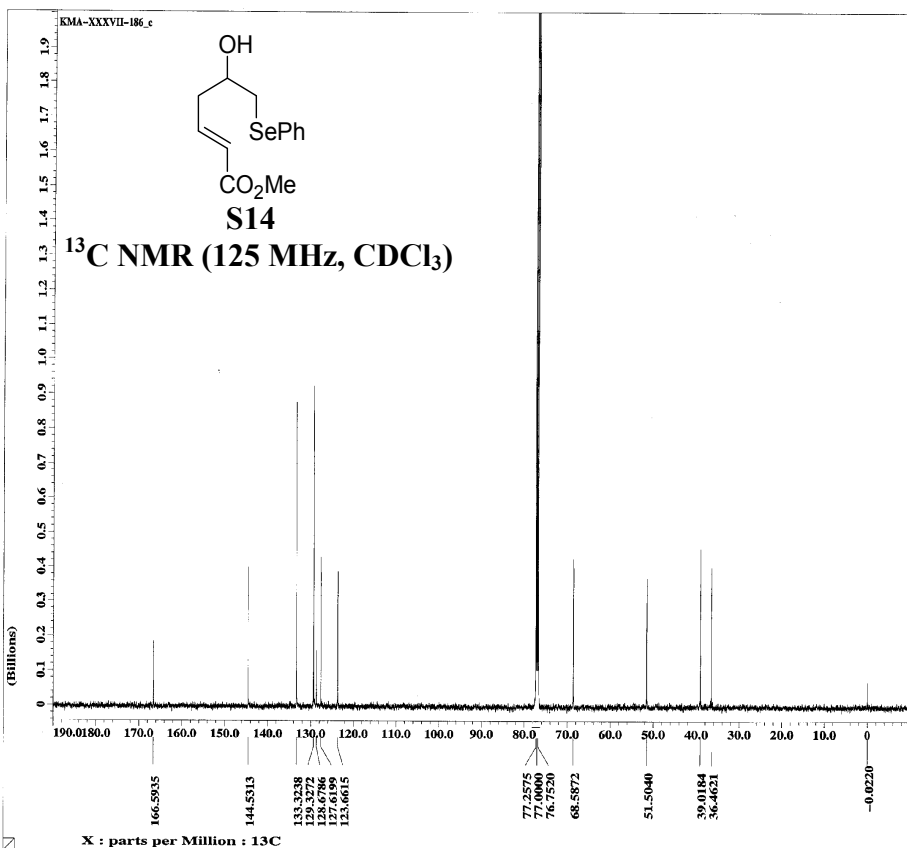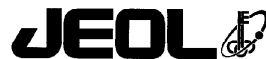

--- ACQUISITION PARAMETERS ---  
 Derived from: KMA-XXXVII-186\_c.1  
 File Name = KMA-XXXVII-186\_c.3  
 Author = delta  
 Sample ID = KMA-XXXVII-186  
 Content = KMA-XXXVII-186\_c  
 Creation Date = 14-SEP-2011 15:02:39  
 Revision Date = 18-SEP-2011 10:05:31  
 Spec Site = KCA 500  
 Spec Type = DELTA2 NMR  
 Data Format = 1D COMPLEX  
 Dimensions = X  
 Dim Title = 13C  
 Dim Size = 26214  
 Dim Units = [ppm]  
 Field\_strength = 11.7473579 [T] (500MH)  
 X\_acq\_duration = 0.83361792 [s]  
 X\_domain = 13C  
 X\_freq = 125.76529768 [MHz]  
 X\_offset = 100 [ppm]  
 X\_points = 32768  
 X\_prescans = 4  
 X\_resolution = 1.19959034 [Hz]  
 X\_sweep = 39.3081761 [kHz]  
 Irf\_domain = 1H  
 Irf\_freq = 500.15991521 [MHz]  
 Irf\_offset = 5.0 [ppm]  
 Mod\_return = 1  
 Scans = 3801  
 Total\_scans = 3801  
 X\_90\_width = 10.5 [us]  
 X\_acq\_time = 0.83361792 [s]  
 X\_angle = 30 [deg]  
 X\_atn = 6.8 [dB]  
 X\_pulse = 3.5 [us]  
 Irf\_atn\_dec = 19.6 [dB]  
 Irf\_atn\_noe = 21.6 [dB]  
 Irf\_noise = WALZ2  
 Decoupling = TRUE  
 Initial\_wait = 2 [s]  
 Noe = TRUE  
 Noe\_time = 2 [s]  
 Relaxation\_delay = 0.1 [s]  
 Repetition\_time = 2.83361792 [s]  
 Experiment = single\_pulse\_dec  
 Recv\_gain = 60  
 Solvent = CHLOROFORM-D

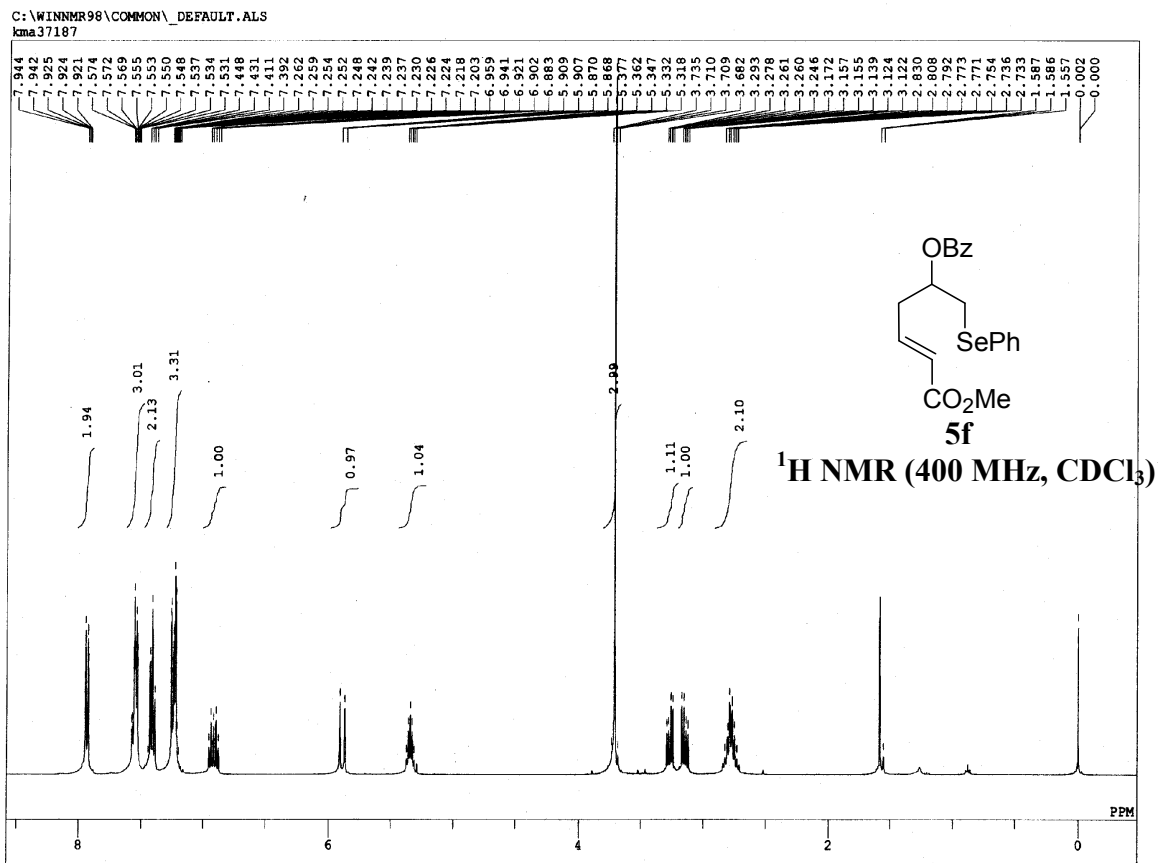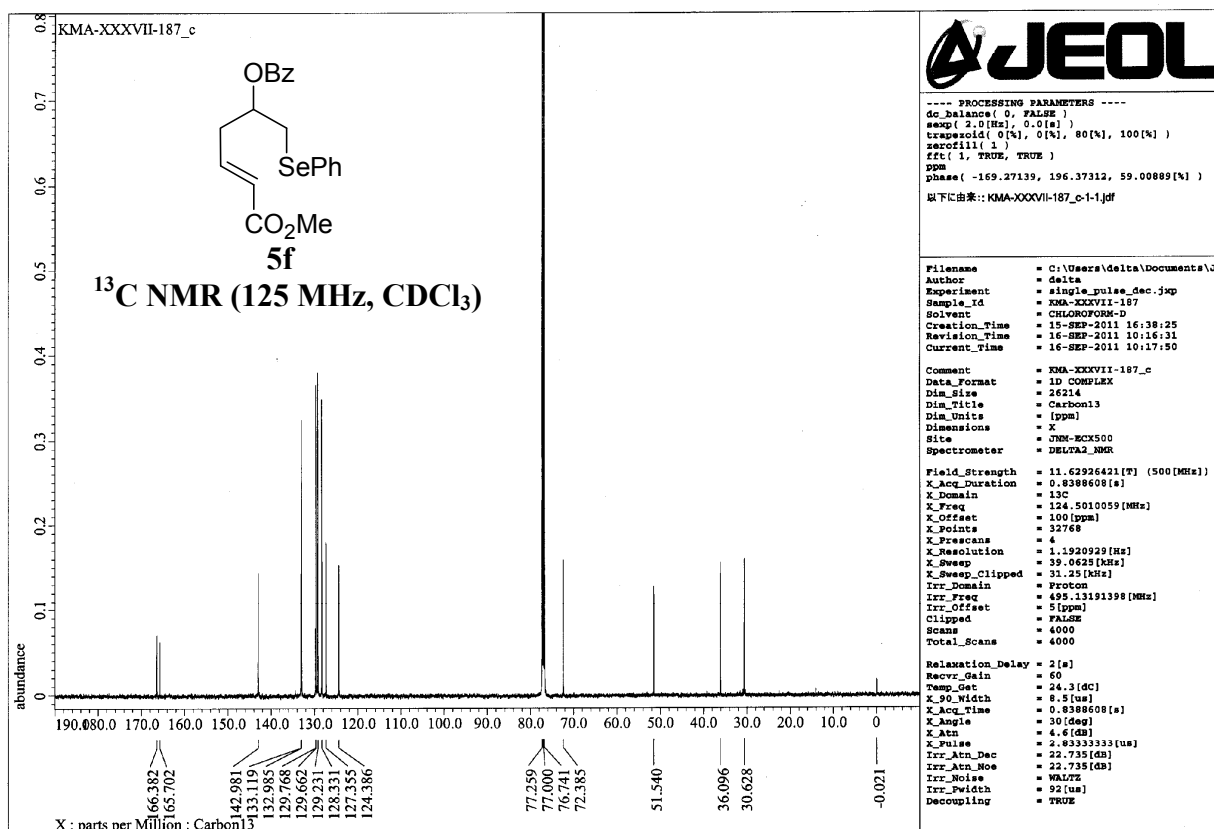



C:\WINNMR98\COMMON\_DEFAULT.ALS  
 kma37191

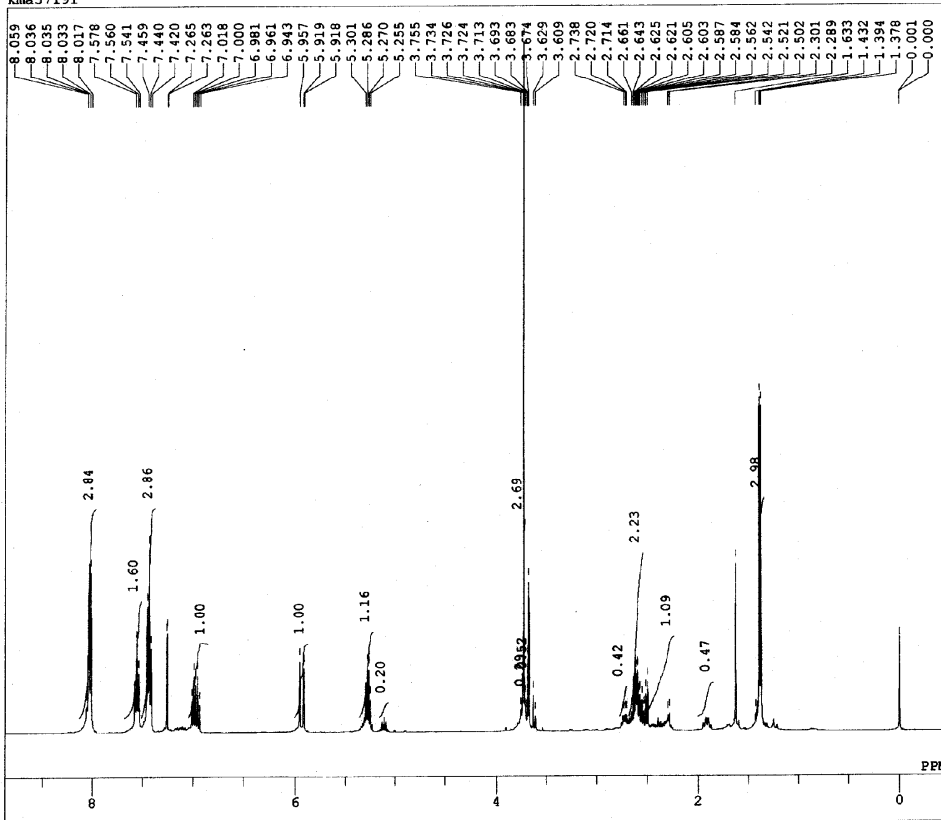

DFILE C:\WINNMR98\COMMON\_DEFAULT.ALS  
 CONNT kma37191  
 DATIM Tue Sep 20 08:58:48 2011  
 OBNUC 1H  
 EXMOD NON  
 OBFREQ 399.65 MHz  
 OBSETE 124.00 KHz  
 OBFIN 10500.00 Hz  
 POINT 32768  
 FREQU 7992.01 Hz  
 SCANS 80  
 ACQTM 4.1001 sec  
 PD 2.9000 sec  
 PW1 5.80 usec  
 IRNUC 1H  
 CTEMP 23.8 c  
 SLVNT CDCL3  
 EXREF 0.00 ppm  
 BF 0.12 Hz  
 RGAIN 14

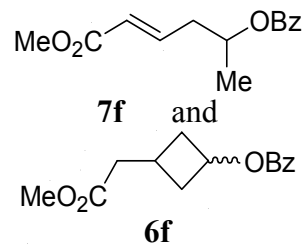

<sup>1</sup>H NMR (400 MHz, CDCl<sub>3</sub>)

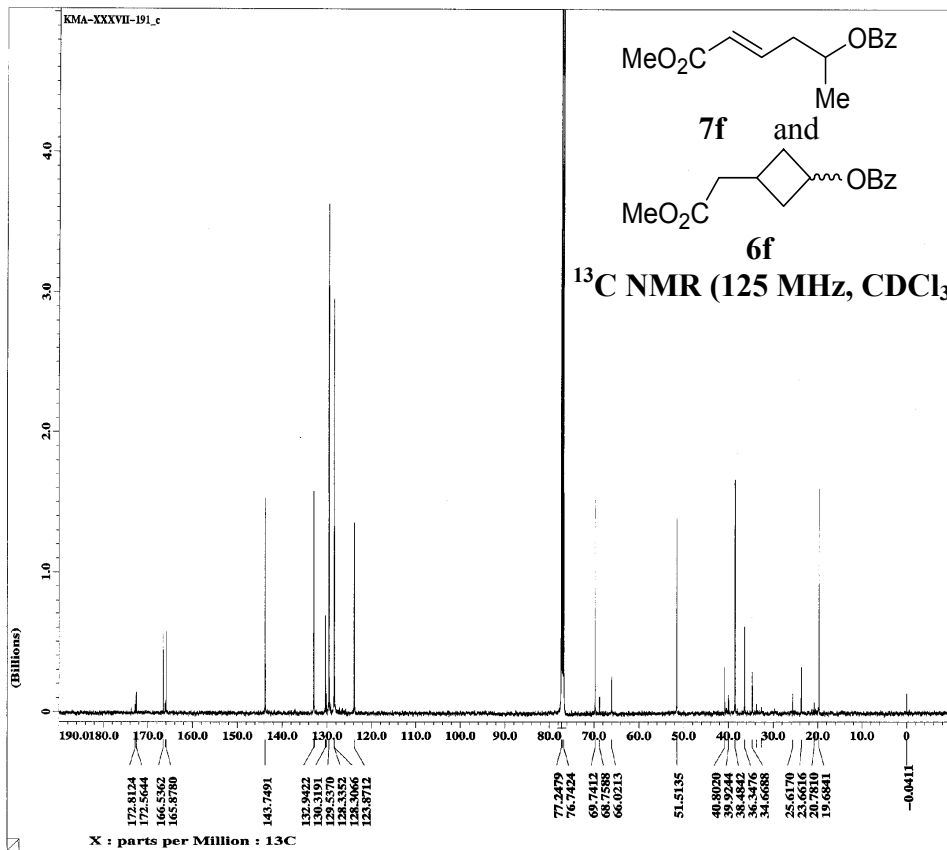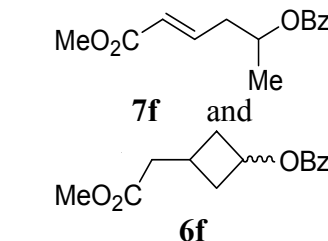

<sup>13</sup>C NMR (125 MHz, CDCl<sub>3</sub>)

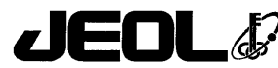

---- ACQUISITION PARAMETERS ----  
 Derived from: KMA-XXXVII-191.c.1  
 File Name = KMA-XXXVII-191.c.5  
 Author = delta  
 Sample ID = KMA-XXXVII-191  
 Content = KMA-XXXVII-191.c  
 Creation Date = 20-SEP-2011 22:09:34  
 Revision Date = 21-SEP-2011 15:46:29  
 Spec Site = ECA 500  
 Spec Type = DELTA2\_NMR  
 Data Format = 1D\_COMPLEX  
 Dimensions = X  
 Dim Title = 13C  
 Dim Size = 26214  
 Dim Units = [ppm]  
 Field strength = 125.76529768[MHz]  
 X\_acq\_duration = 0.83361792[s]  
 X\_domain = 13C  
 X\_freq = 125.76529768[MHz]  
 X\_offset = 100[ppm]  
 X\_points = 32768  
 X\_pscans = 4  
 X\_resolution = 1.19959034[Hz]  
 X\_sweep = 39.3081761[kHz]  
 Irr\_domain = 1H  
 Irr\_freq = 500.15991521[MHz]  
 Irr\_offset = 5.0[ppm]  
 Mod\_return = 1  
 Scans = 10000  
 Total\_scans = 10000  
 X\_90\_width = 10.5[us]  
 X\_acq\_time = 0.83361792[s]  
 X\_angle = 30[deg]  
 X\_atn = 6.8[dB]  
 X\_pulse = 3.5[us]  
 Irr\_atn\_dec = 19.6[dB]  
 Irr\_atn\_noe = 21.6[dB]  
 Irr\_noise = WALTZ  
 Decoupling = TRUE  
 Initial\_wait = 1[s]  
 Noe = TRUE  
 Noe\_time = 2[s]  
 Relaxation\_delay = 2[s]  
 Repetition\_time = 2.83361792[s]  
 Experiment = single\_pulse\_dec  
 Recvr\_gain = 60  
 Solvent = CHLOROFORM-D

C:\WINNMR98\COMMON\\_DEFAULT.ALS  
 kma37119

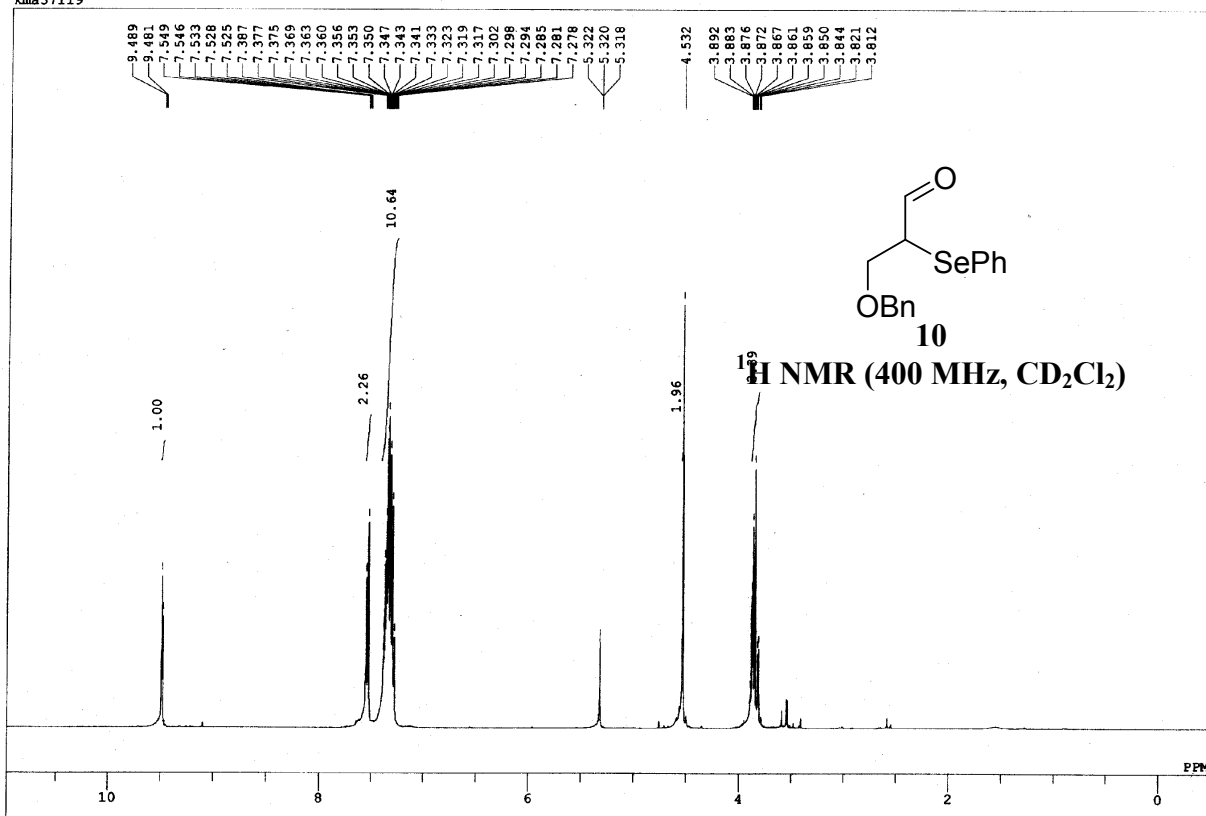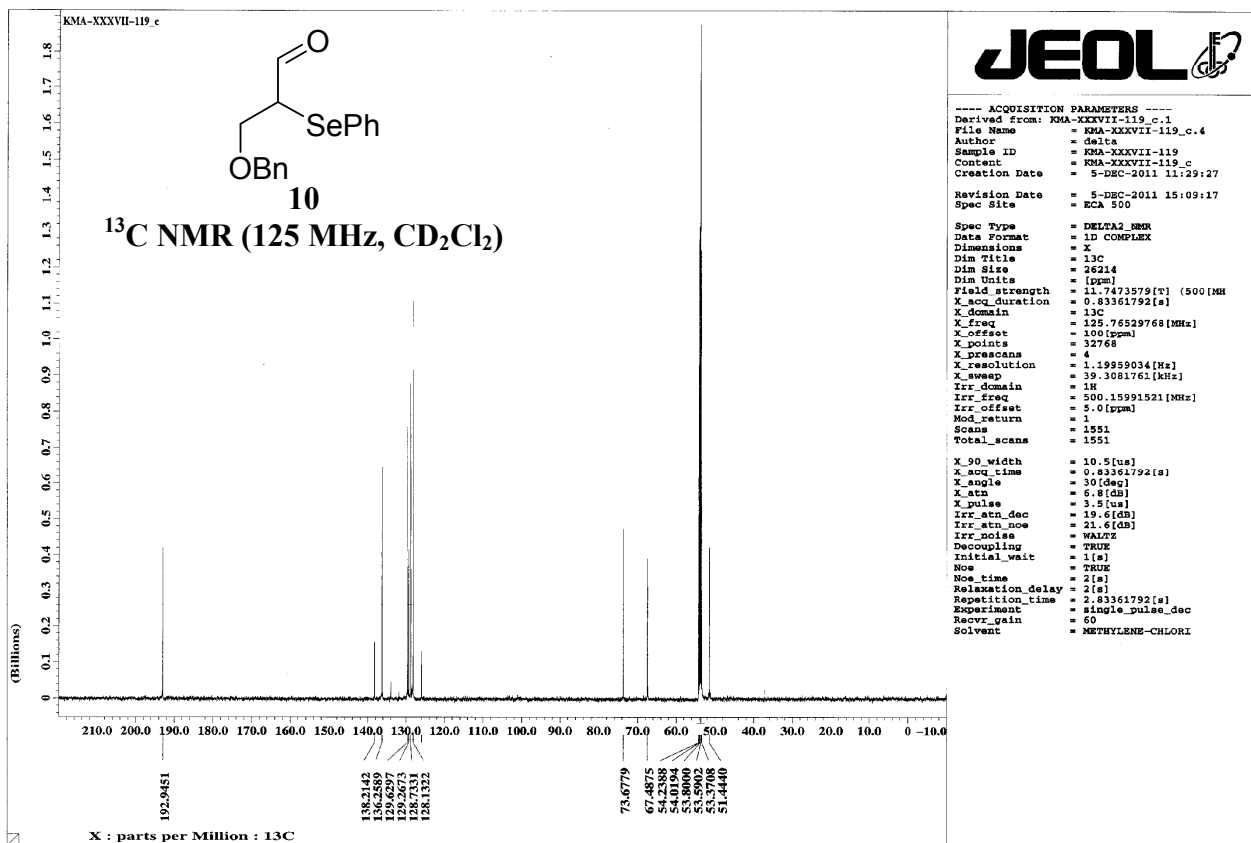

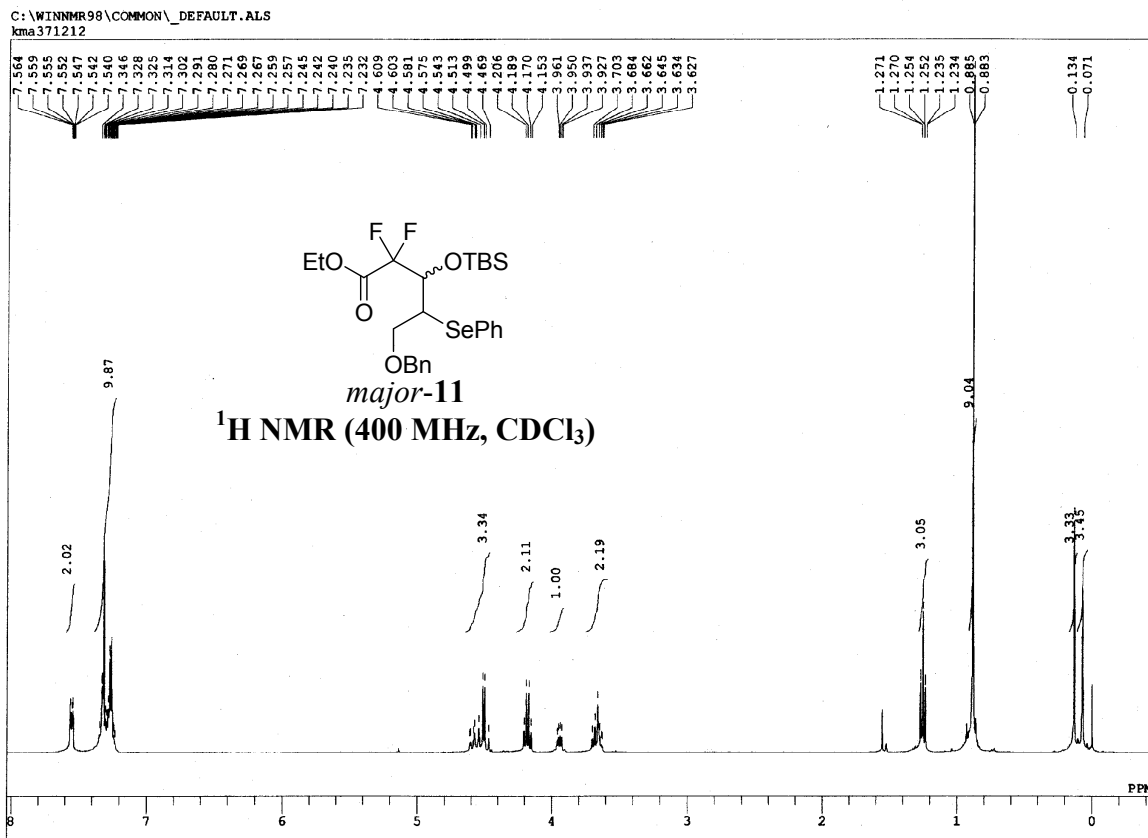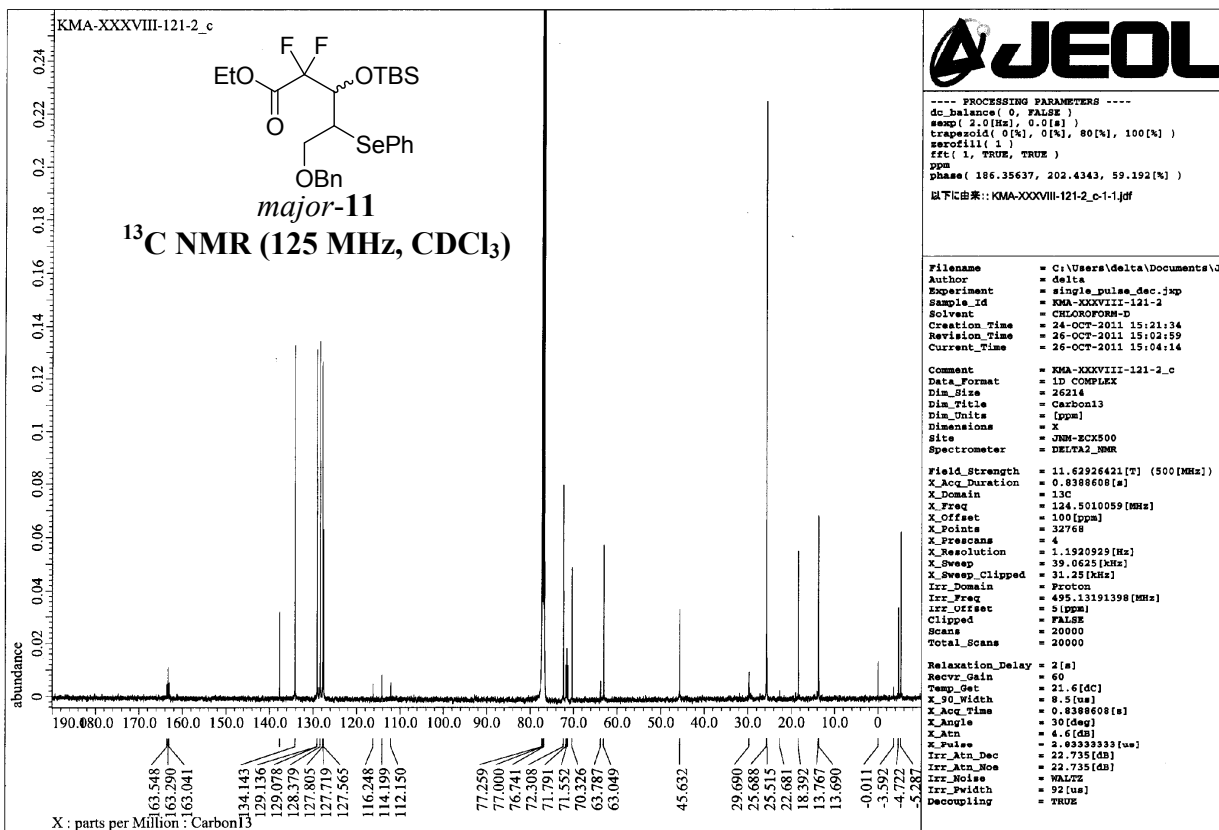

C:\WINNMR98\COMMON\\_DEFAULT.ALS  
 kma371211

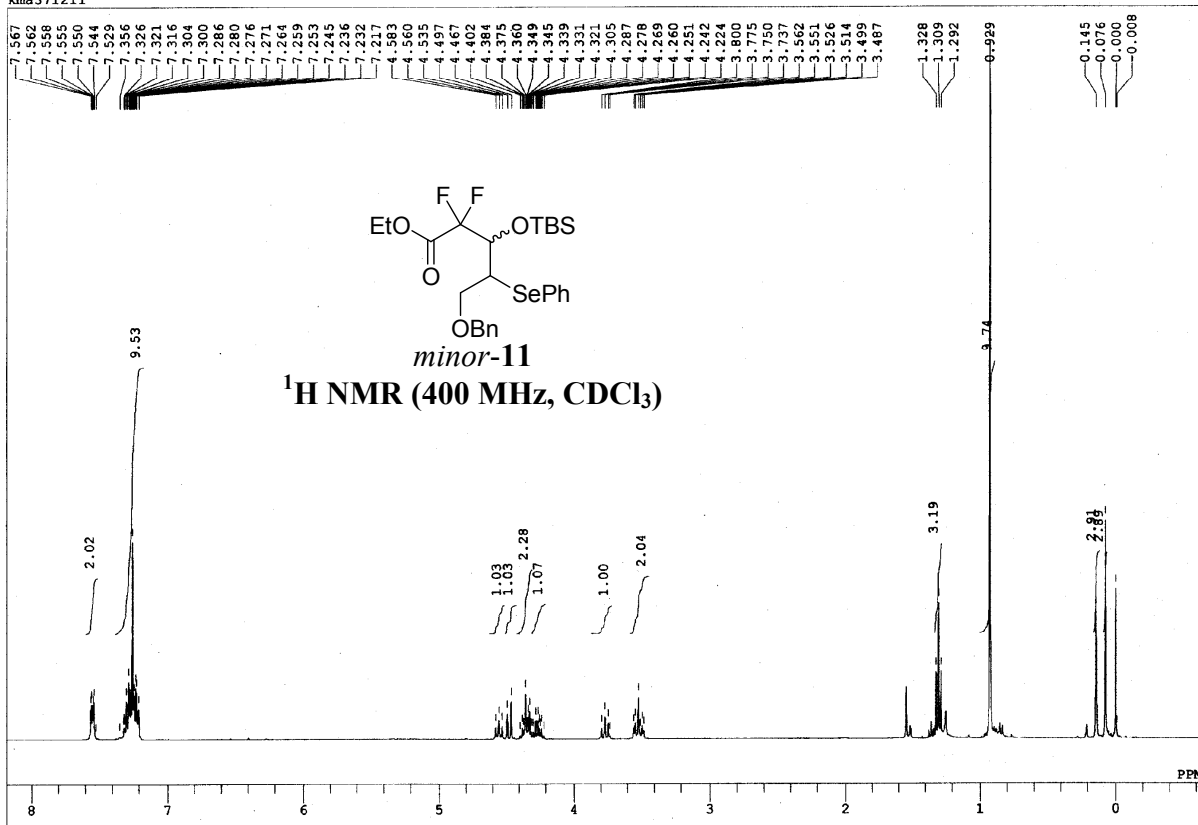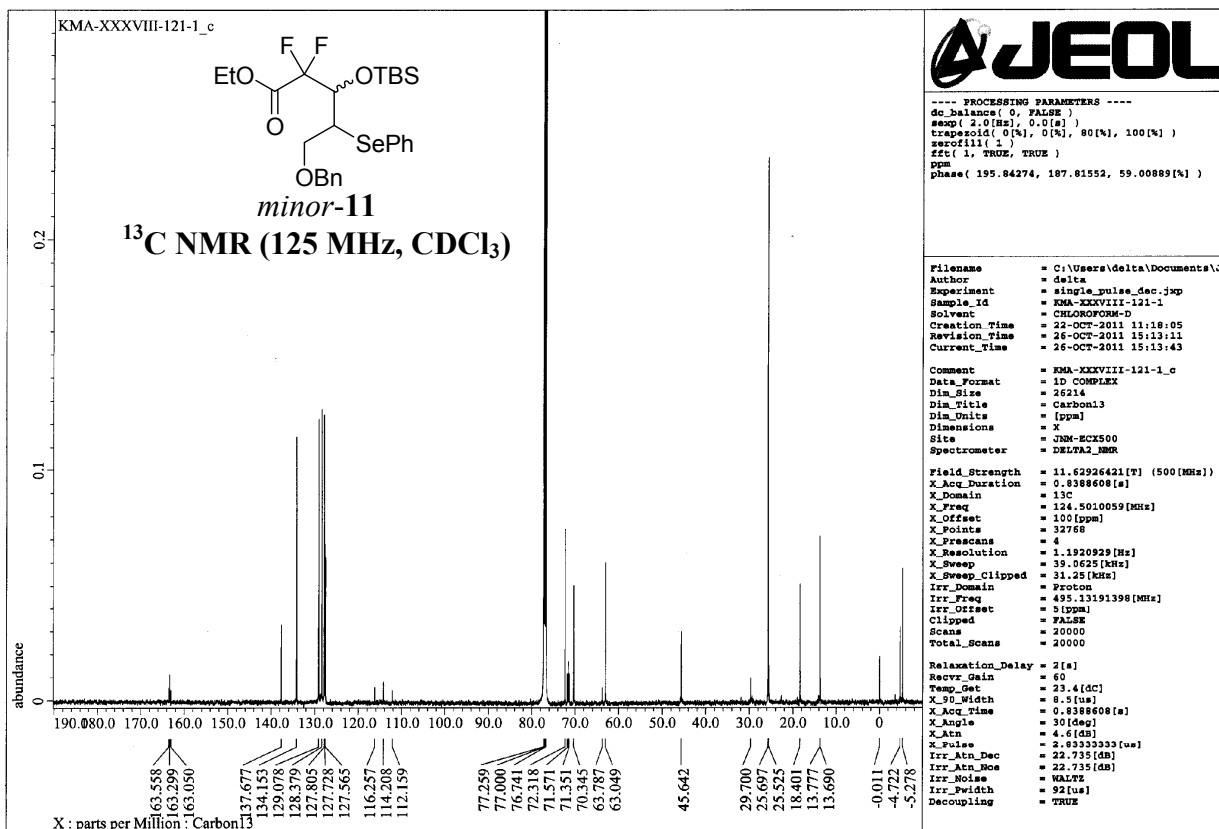

C:\WINNMR98\COMMON\\_DEFAULT.ALS

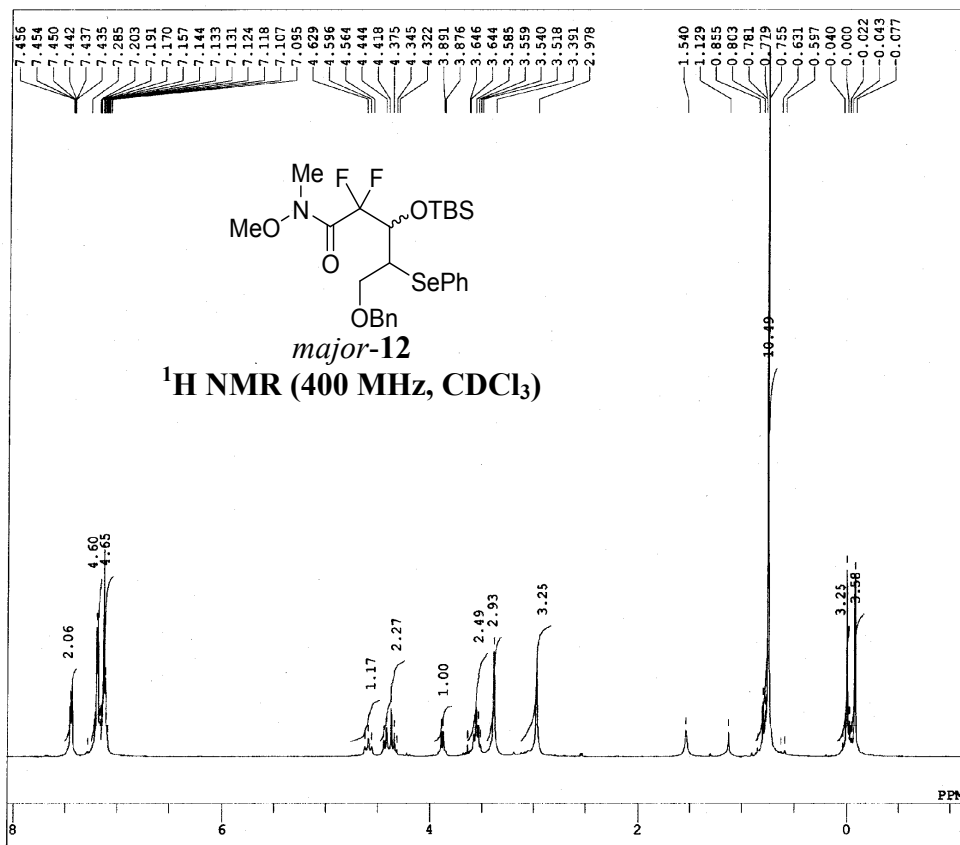

DFILE C:\WINNMR98\COMMON\\_DEFAULT.ALS  
 COMNT  
 DATIM Sun Oct 09 12:07:31 2011  
 OBNUC 1H  
 EXMOD NON  
 OBFRQ 399.65 MHz  
 OBSSET 124.00 KHz  
 OBFIN 10500.00 Hz  
 POINT 32768  
 FREQU 7992.01 Hz  
 SCANS 40  
 ACQTM 4.1001 sec  
 PD 2.9000 sec  
 PW1 5.80 usec  
 IRNUC 1H  
 CTEMP 23.4 c  
 SLVNT CDCL3  
 EXREF 0.00 ppm  
 BF 0.12 Hz  
 RGAIN 13

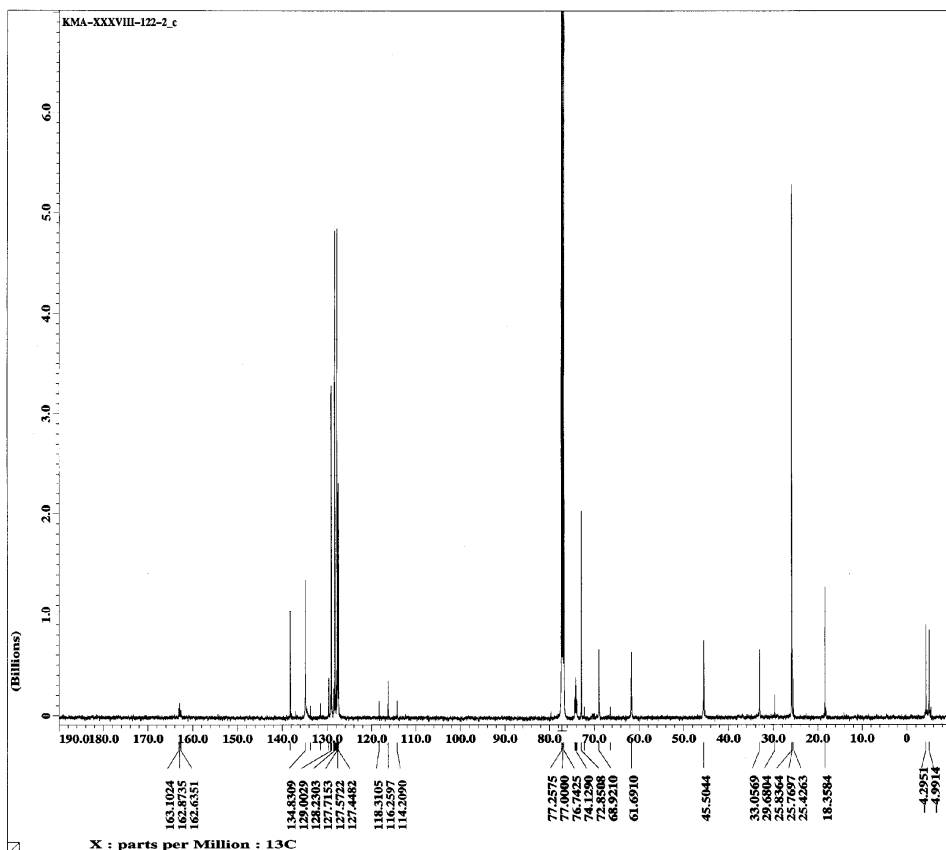

**JEOL**

----- ACQUISITION PARAMETERS -----  
 Derived from: KMA-XXXVIII-122-2\_c.1  
 File Name = KMA-XXXVIII-122-2\_c.4  
 Author = delta  
 Sample ID = KMA-XXXVIII-122-2  
 Content = KMA-XXXVIII-122-2\_c  
 Creation Date = 14-OCT-2011 01:52:49  
 Revision Date = 14-OCT-2011 10:26:24  
 Spec Site = ECA 500  
 Spec Type = DELTA2\_MGR  
 Data Format = 1D\_COMPLEX  
 Dimensions = 2  
 Dim Title = 13C  
 Dim Size = 26214  
 Dim Units = [ppm]  
 Field\_strength = 11.7473579 [T] (500[MH  
 X\_acq\_duration = 0.83361792[s]  
 X\_domain = 13C  
 X\_freq = 125.76529768[MHz]  
 X\_offset = 100[ppm]  
 X\_points = 32768  
 X\_prescans = 4  
 X\_resolution = 1.19989034[Hz]  
 X\_sweep = 39.3081761[kHz]  
 Irr\_domain = 1H  
 Irr\_freq = 500.15991521[MHz]  
 Irr\_offset = 5.0[ppm]  
 Mod\_return = 1  
 Scans = 20000  
 Total\_scans = 20000  
 X\_90\_width = 10.5[us]  
 X\_acq\_time = 0.83361792[s]  
 X\_angle = 30[deg]  
 X\_atn = 6.8[db]  
 X\_pulse = 3.5[us]  
 Irr\_atn\_dec = 19.6[db]  
 Irr\_atn\_noc = 21.6[db]  
 Irr\_soia = WALTZ  
 Decoupling = TRUP  
 Initial\_wait = 1[s]  
 Noc = TRUP  
 Noc\_time = 2[s]  
 Relaxation\_delay = 2[s]  
 Repetition\_time = 2.83361792[s]  
 Experiment = single\_pulse\_dec  
 Recvr\_gain = 60  
 Solvent = CHLOROFORM-D

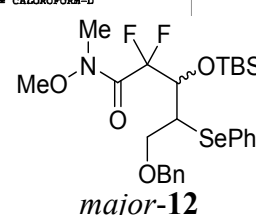

<sup>13</sup>C NMR (125 MHz, CDCl<sub>3</sub>)

C:\WINNMR98\COMMON\\_DEFAULT.ALS  
 kma3712212

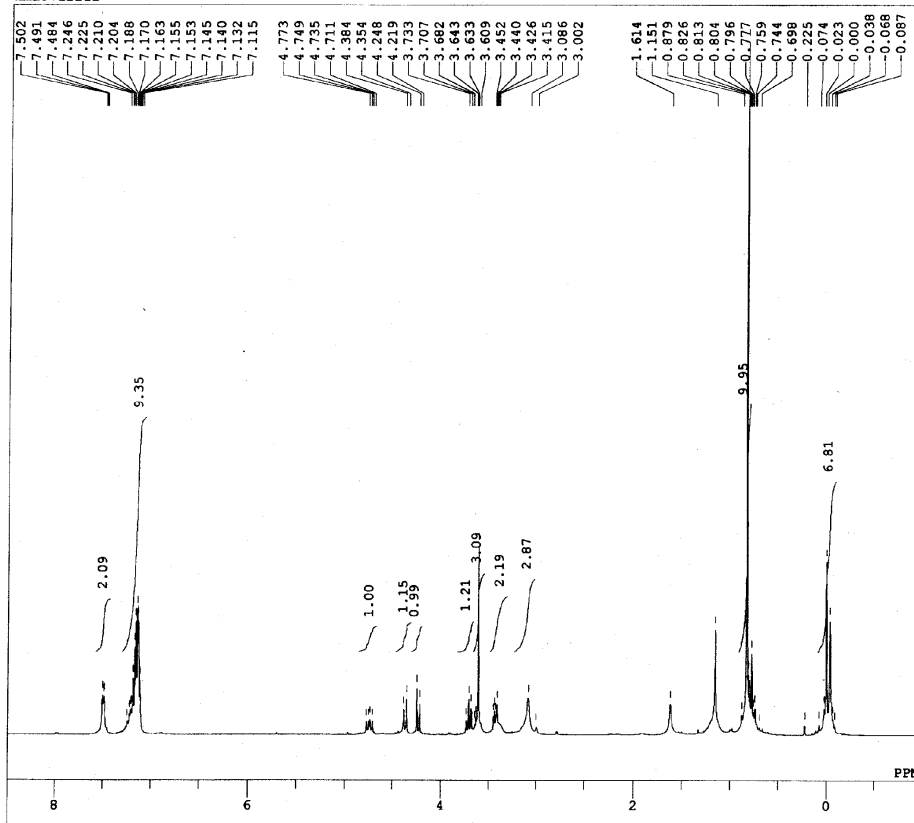

DFILE C:\WINNMR98\COMMON\\_DEFAULT.ALS  
 COMNT kma3712212  
 DATIM Mon Oct 10 12:51:21 2011  
 OBNUC 1H  
 EXMOD NON  
 OBFRO 399.65 MHz  
 OBSFET 124.00 KHz  
 OBSFIN 10500.00 Hz  
 POINT 32768  
 FREQU 7992.01 Hz  
 SCANS 40  
 ACQTM 4.1001 sec  
 PD 2.9000 sec  
 PW1 5.80 usec  
 IRNUC 1H  
 CTEMP 23.4 c  
 SLVNT CDCL3  
 EXREF 0.00 ppm  
 BF 0.12 Hz  
 RGAIN 13

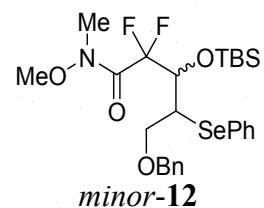

<sup>1</sup>H NMR (400 MHz, CDCl<sub>3</sub>)

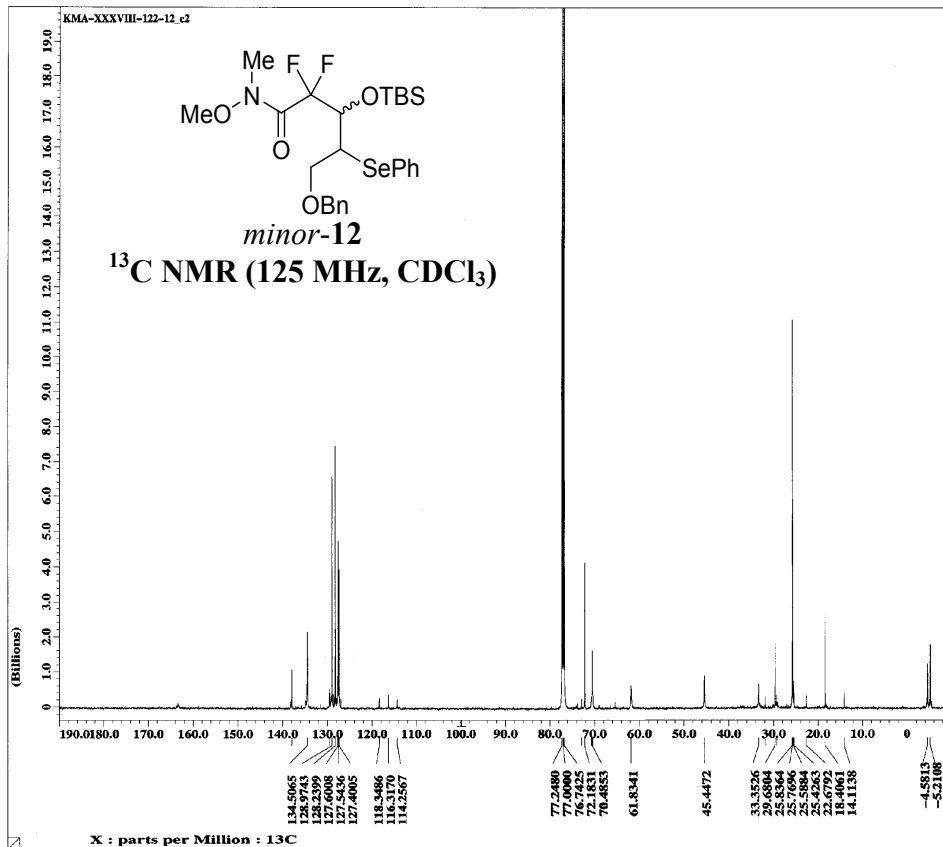

**JEOL**

----- ACQUISITION PARAMETERS -----  
 Derived from: KMA-XXXVIII-122-12\_c2.6  
 File Name = KMA-XXXVIII-122-12\_c2  
 Author = delta  
 Sample ID = KMA-XXXVIII-122-12  
 Content = KMA-XXXVIII-122-12\_c2  
 Creation Date = 16-OCT-2011 21:18:44  
 Revision Date = 17-OCT-2011 17:32:17  
 Spec Site = ECA 500  
 Spec Type = DELTA2\_MBR  
 Data Format = 1D\_COMPLEX  
 Dimensions = X  
 Dim Title = 13C  
 Dim Size = 26214  
 Dim Units = (ppm)  
 Field strength = 11.7473579 [T] (500 [MH])  
 X\_acq\_duration = 0.83361792 [s]  
 X\_domain = 13C  
 X\_freq = 125.76529768 [MHz]  
 X\_offset = 100 [ppm]  
 X\_points = 32768  
 X\_pulsescans = 4  
 X\_resolution = 1.19959034 [Hz]  
 X\_sweep = 39.3081761 [kHz]  
 Irr\_domain = 1H  
 Irr\_freq = 500.15991521 [MHz]  
 Irr\_offset = 5.0 [ppm]  
 Mod\_return = 1  
 Scans = 40000  
 Total\_scans = 40000  
 X\_90\_width = 10.5 [us]  
 X\_acq\_time = 0.83361792 [s]  
 X\_angle = 30 [deg]  
 X\_atn = 6.8 [dB]  
 X\_pulse = 3.5 [us]  
 Irr\_stn\_dec = 19.6 [dB]  
 Irr\_stn\_noe = 21.6 [dB]  
 Irr\_noise = WALTZ  
 Decoupling = TRUE  
 Initial\_wait = 1 [s]  
 Noe\_time = TRUE  
 Noe\_time = 2 [s]  
 Relaxation\_delay = 2 [s]  
 Repetition\_time = 2.83361792 [s]  
 Experiment = single\_pulse\_dec  
 Recvr\_gain = 60  
 Solvent = CHLOROFORM-D



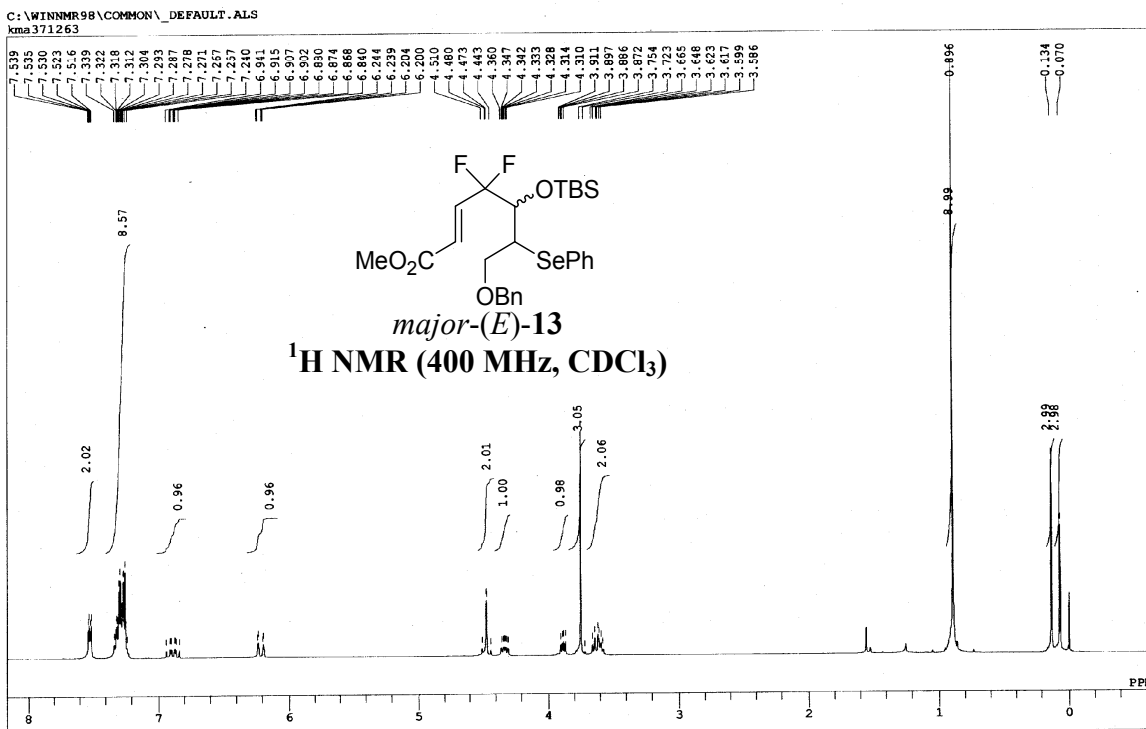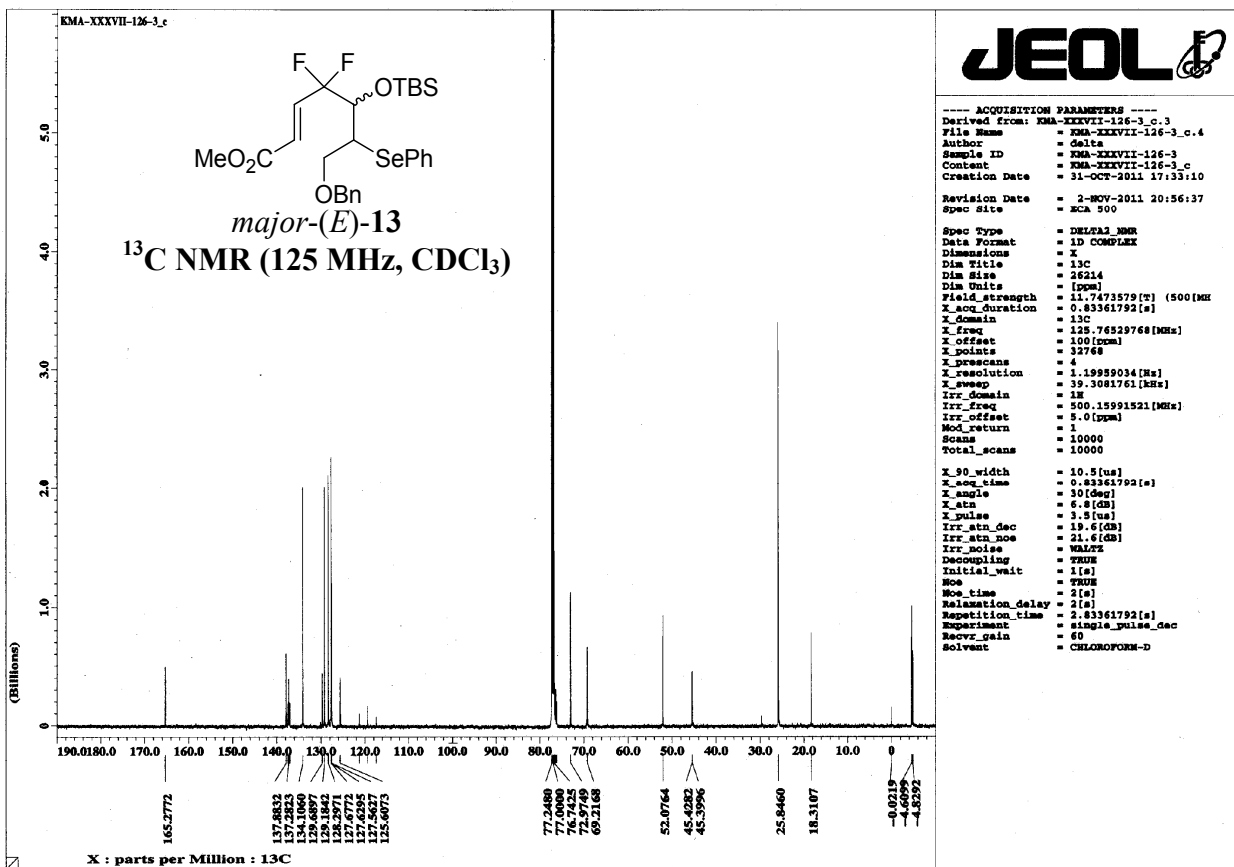

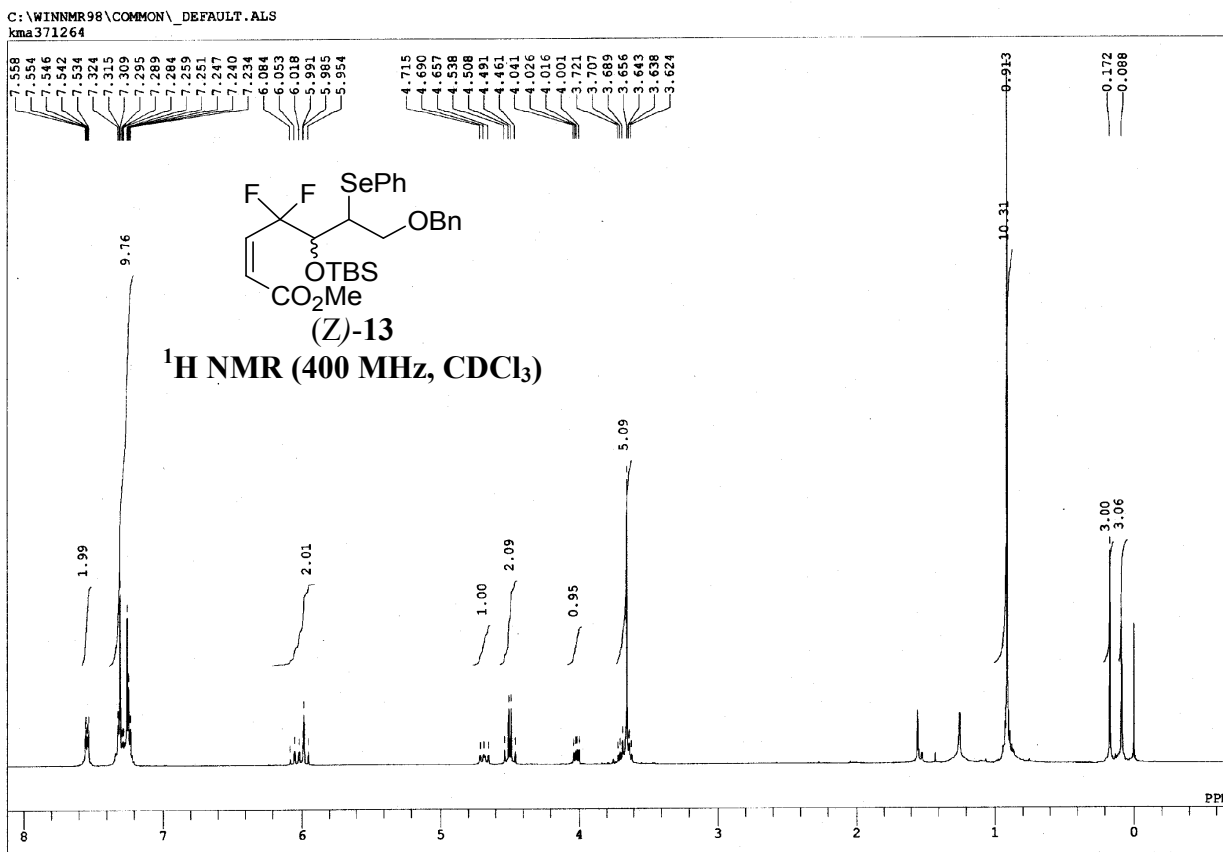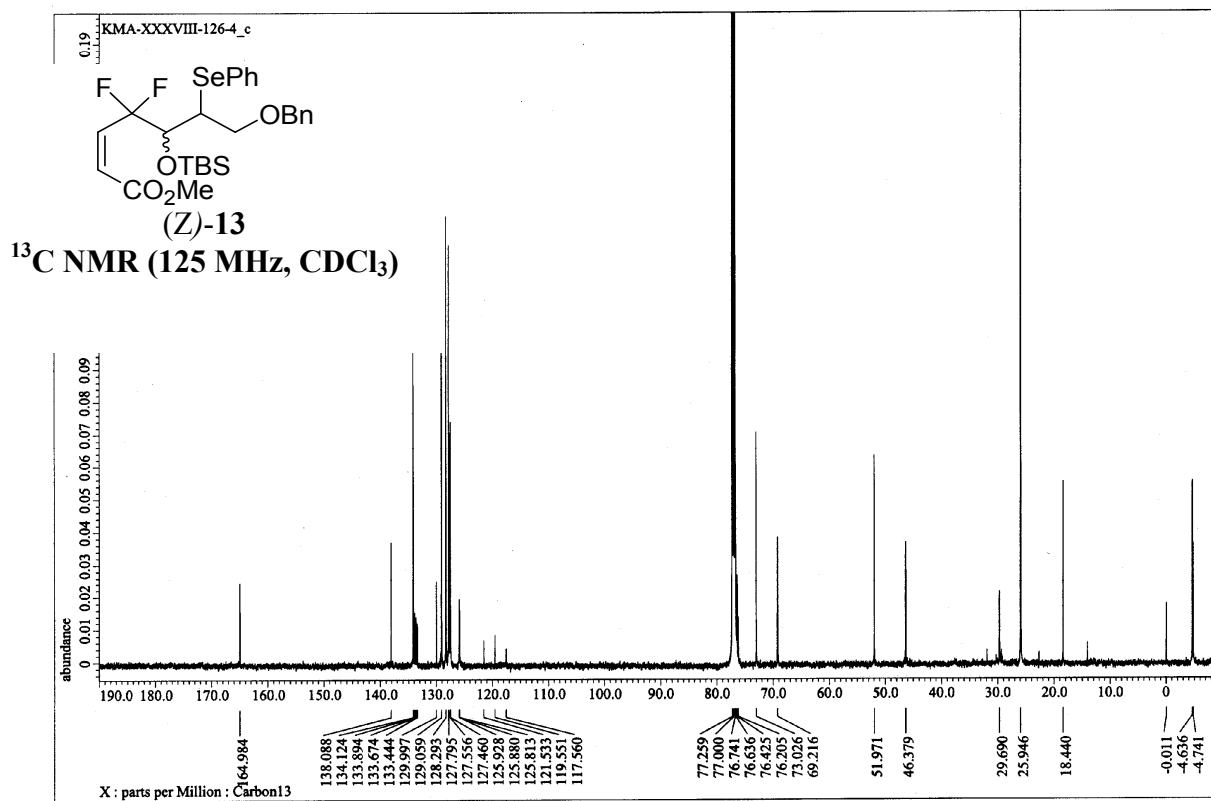

C:\WINNMR98\COMMON\\_DEFAULT.ALS  
 kma371262

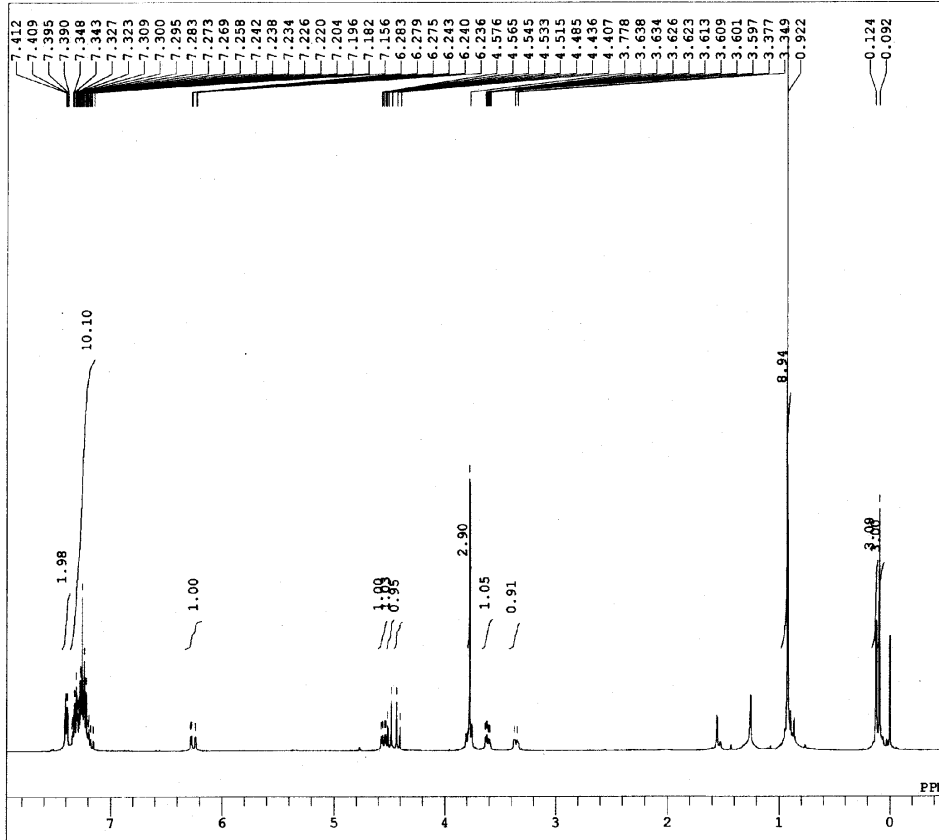

DFILE C:\WINNMR98\COMMON\\_DEFAULT.ALS  
 COMNT kma371262  
 DATIM Thu Oct 13 17:12:29 2011  
 OBNUC 1H  
 EXMOD NON  
 OBFREQ 399.65 MHz  
 OBSET 124.00 KHz  
 OBFIN 10500.00 Hz  
 POINT 32768  
 FREQU 7992.01 Hz  
 SCANS 40  
 ACQTM 4.1001 sec  
 PD 2.9000 sec  
 FW1 5.80 usec  
 IRNUC 1H  
 CTEMP 24.1 c  
 SLVNT CDCL3  
 EXREF 0.00 ppm  
 BF 0.12 Hz  
 RGAIN 15

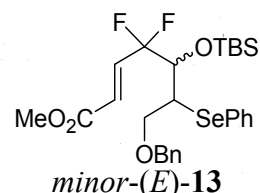

<sup>1</sup>H NMR (400 MHz, CDCl<sub>3</sub>)

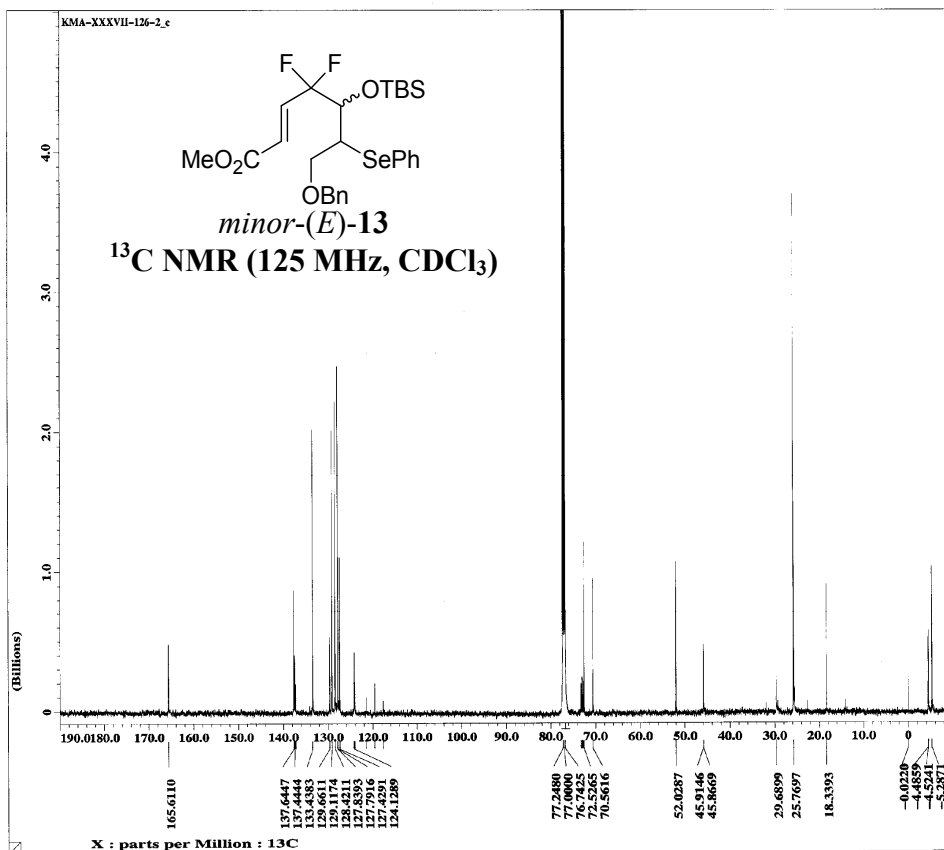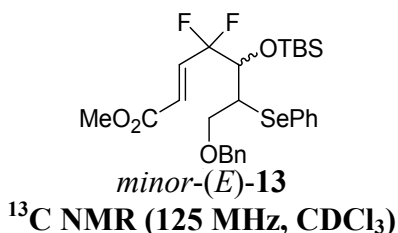

<sup>13</sup>C NMR (125 MHz, CDCl<sub>3</sub>)

**JEOL**

----- ACQUISITION PARAMETERS -----  
 Derived from: KMA-XXXVII-126-2\_c.1  
 File Name = KMA-XXXVII-126-2\_c.4  
 Author = delta  
 Sample ID = KMA-XXXVII-126-2  
 Content = KMA-XXXVII-126-2.c  
 Creation Date = 29-OCT-2011 07:01:49  
 Revision Date = 29-OCT-2011 13:47:33  
 Spec Site = MCA 500  
 Spec Type = DELTA2\_NMR  
 Data Format = 1D\_COMPLEX  
 Dimensions = X  
 Dim Title = 13C  
 Dim Units = [ppm]  
 Dim Size = 26214  
 Field Strength = 11.7473579 [T] (500[MH  
 X\_acq\_duration = 0.83361792[s]  
 X\_domain = 13C  
 X\_freq = 125.76529768 [MHz]  
 X\_offset = 100 [ppm]  
 X\_points = 32768  
 X\_prescans = 4  
 X\_resolution = 1.19959034 [Hz]  
 X\_sweep = 39.3081761 [kHz]  
 X\_angle = 30 [deg]  
 X\_atn = 6.8 [dB]  
 X\_pulse = 3.5 [us]  
 Irr\_atn\_dec = 19.6 [dB]  
 Irr\_atn\_noe = 21.6 [dB]  
 Irr\_noise = WALTZ  
 Decoupling = TRUE  
 Initial\_wait = 1 [s]  
 Noe = TRUE  
 Noe\_time = 2 [s]  
 Relaxation\_delay = 2 [s]  
 Repetition\_time = 2.83361792 [s]  
 Experiment = single\_pulse\_dec  
 Recvr\_gain = 60  
 Solvent = CHLOROFORM-D

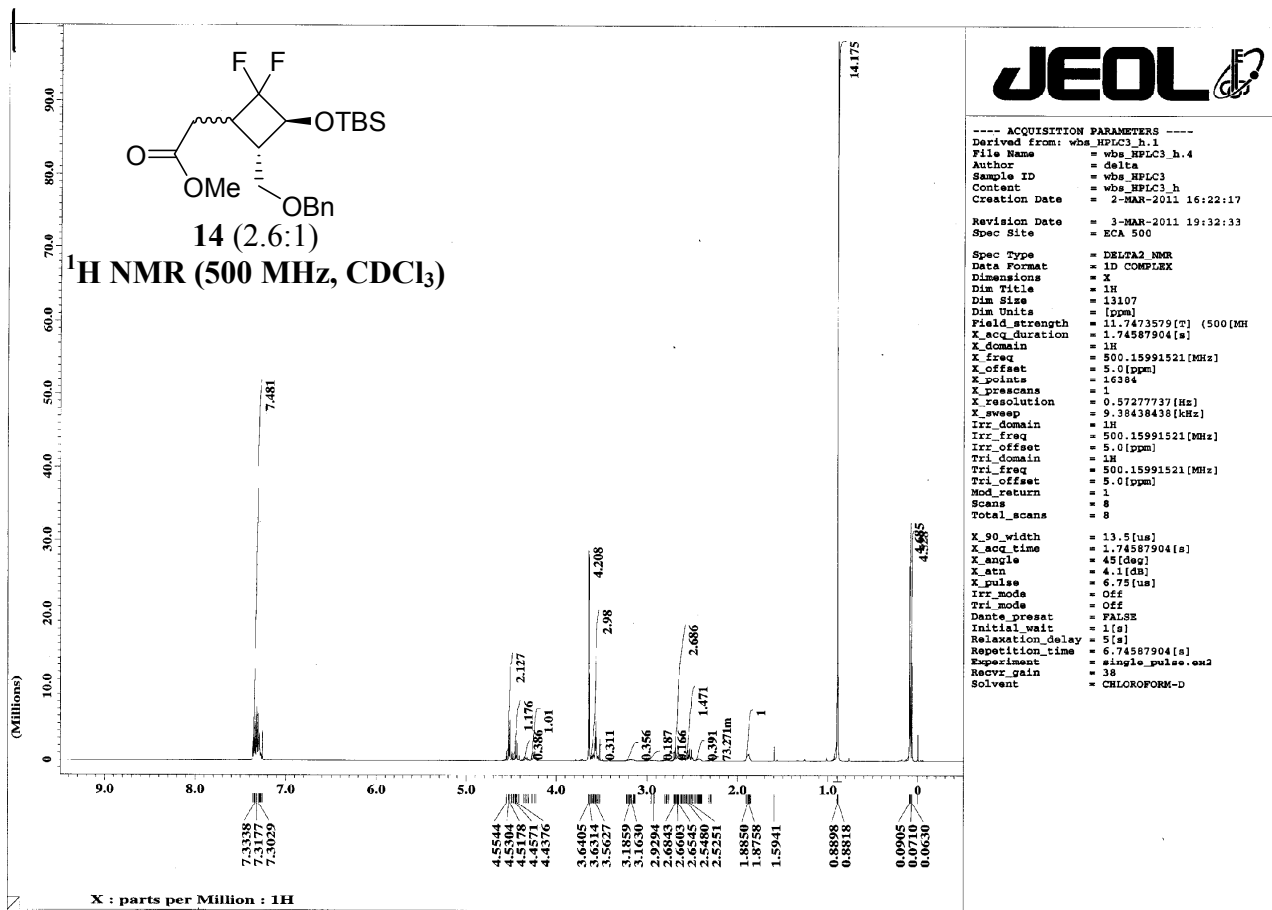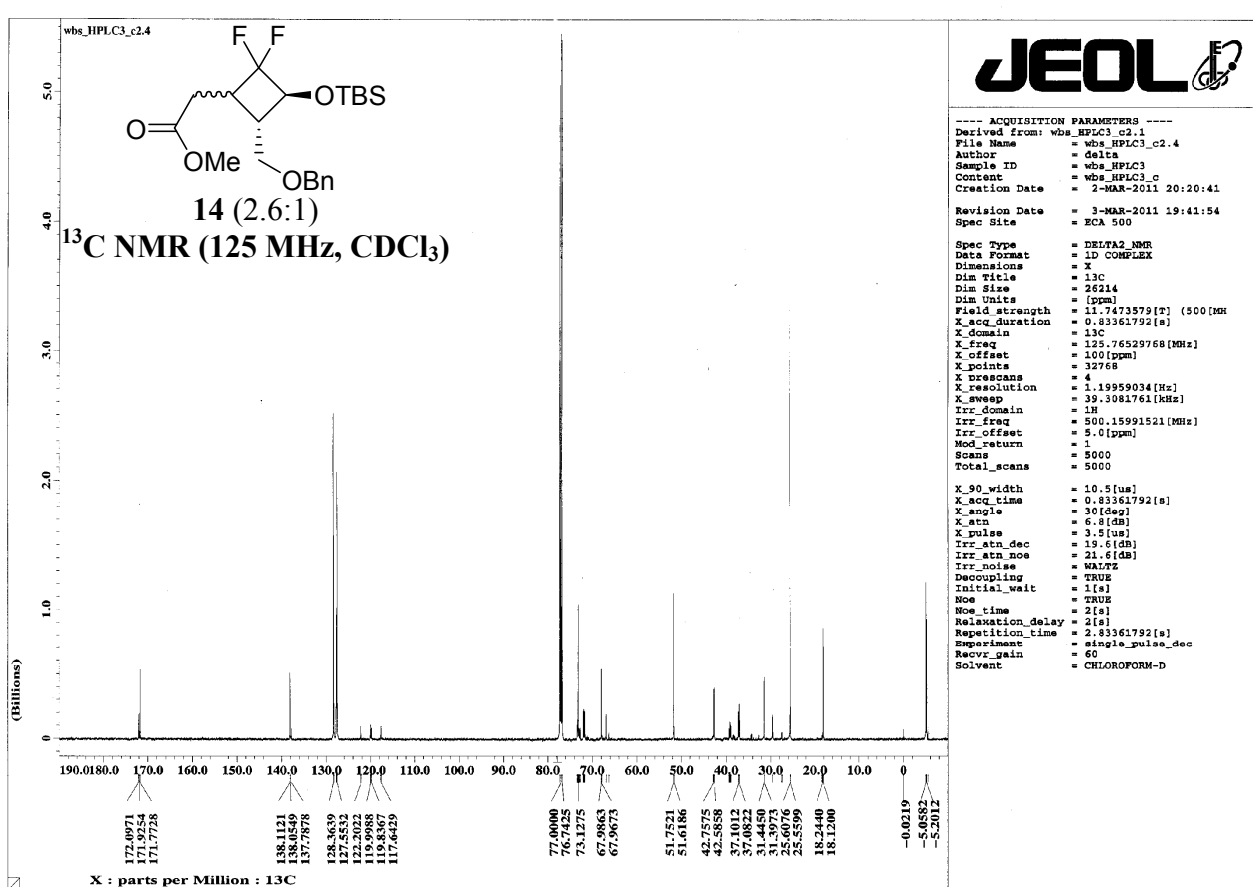

C:\WINNMR98\COMMON\\_DEFAULT.ALS  
 kma371511

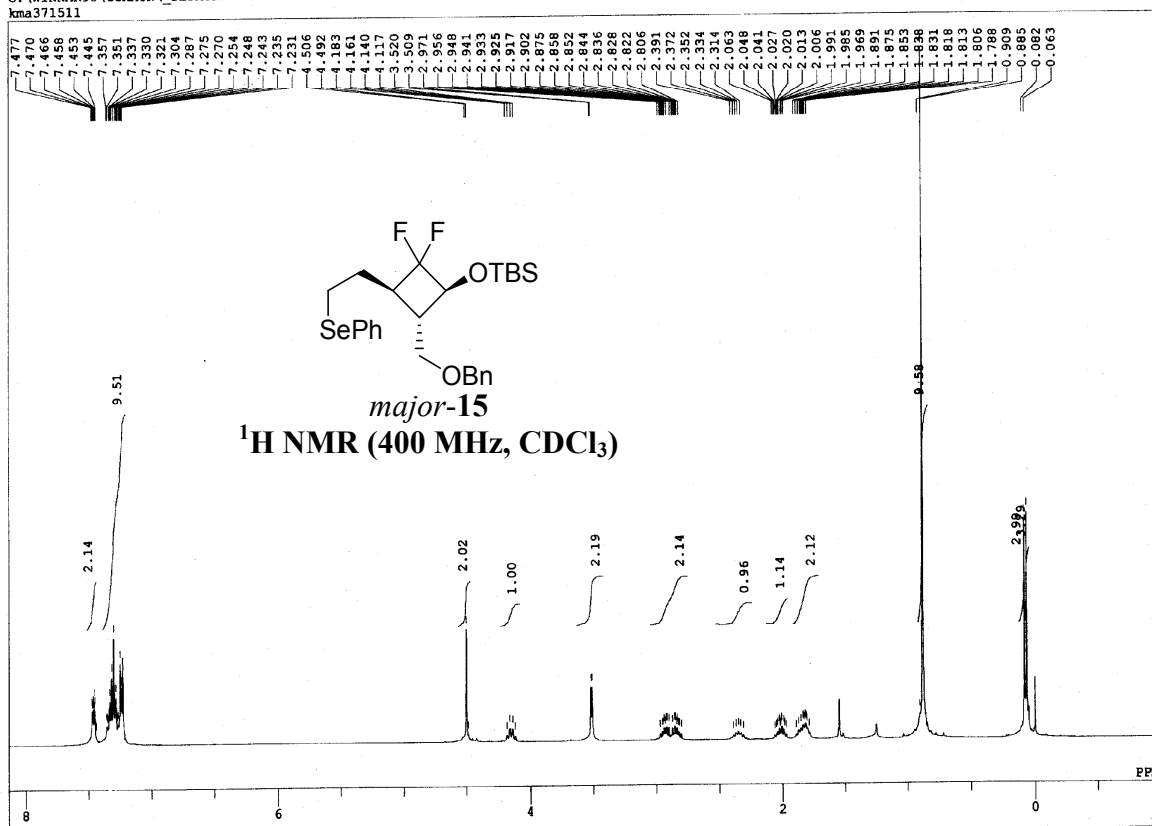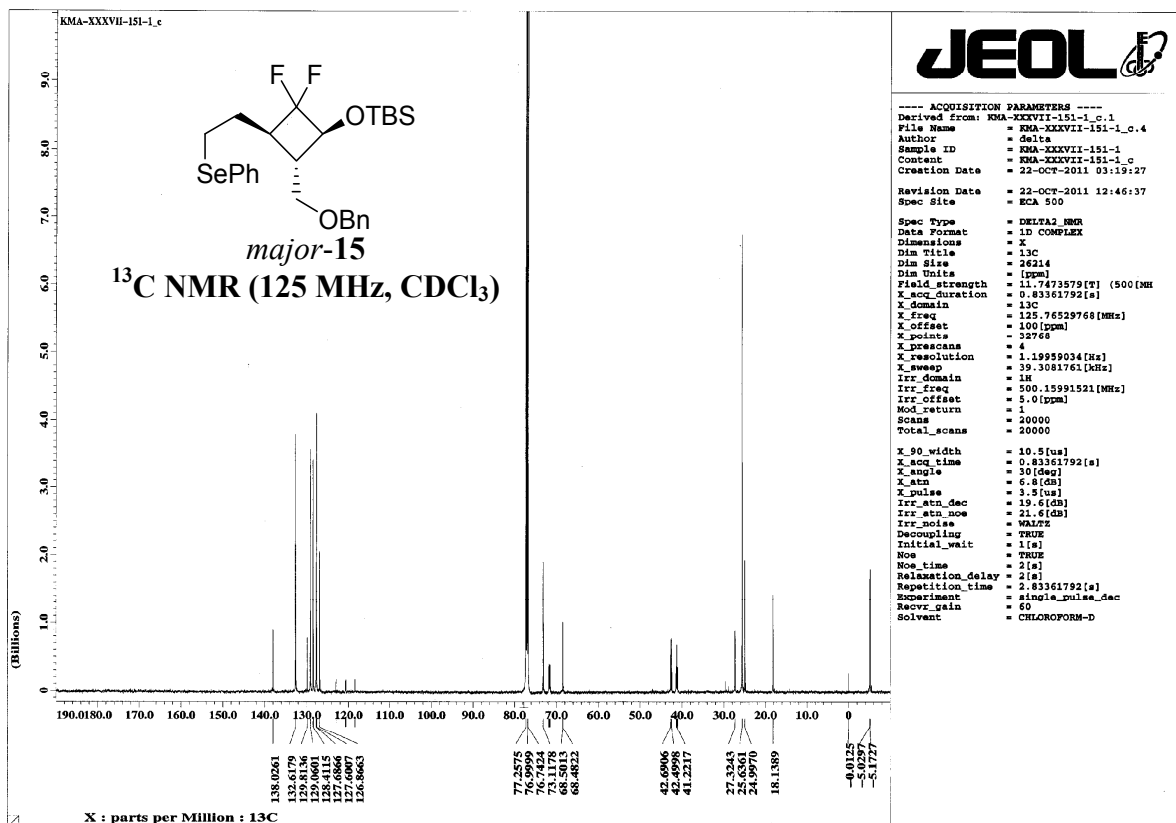

**JEOL**

----- ACQUISITION PARAMETERS -----  
 Derived from: KMA-XXXVII-151-1.c.1  
 File Name = KMA-XXXVII-151-1.c.4  
 Author = Seita  
 Sample ID = KMA-XXXVII-151-1  
 Content = KMA-XXXVII-151-1.c  
 Creation Date = 22-OCT-2011 03:19:27  
 Revision Date = 22-OCT-2011 12:46:37  
 Spec Site = ECA 500

Spec Type = DELTA1 NMR  
 Data Format = 1D COMPLEX  
 Dimensions = X  
 Dim Title = 13c  
 Dim Size = 26214  
 Dim Units = [ppm]  
 Field\_strength = 11.7473579 [T] (500 [MH])  
 X\_acq\_duration = 0.83361792 [s]  
 X\_domain = 13c  
 X\_freq = 125.76529766 [MHz]  
 X\_offset = 100 [ppm]  
 X\_points = 32768  
 X\_procscans = 4  
 X\_resolution = 1.19959034 [Hz]  
 X\_sweep = 39.3081761 [kHz]  
 Irf\_domain = 1K  
 Irf\_freq = 500.15991521 [MHz]  
 Irf\_offset = 5.0 [ppm]  
 Mod\_return = 1  
 Scans = 20000  
 Total\_scans = 20000

X\_90\_width = 10.5 [us]  
 X\_acq\_time = 0.83361792 [s]  
 X\_angle = 30 [deg]  
 X\_atn = 6.8 [dB]  
 X\_pulse = 3.5 [us]  
 Irf\_atn\_dec = 19.6 [dB]  
 Irf\_atn\_noc = 21.6 [dB]  
 Irf\_noise = VAL12  
 Decoupling = TRUE  
 Initial\_wait = 1 [s]  
 Noe = TRUE  
 Noe\_time = 2 [s]  
 Relaxation\_delay = 2 [s]  
 Repetition\_time = 0.83361792 [s]  
 Experiment = single\_pulse\_dec  
 Recvr\_gain = 50  
 Solvent = CHLOROFORM-D

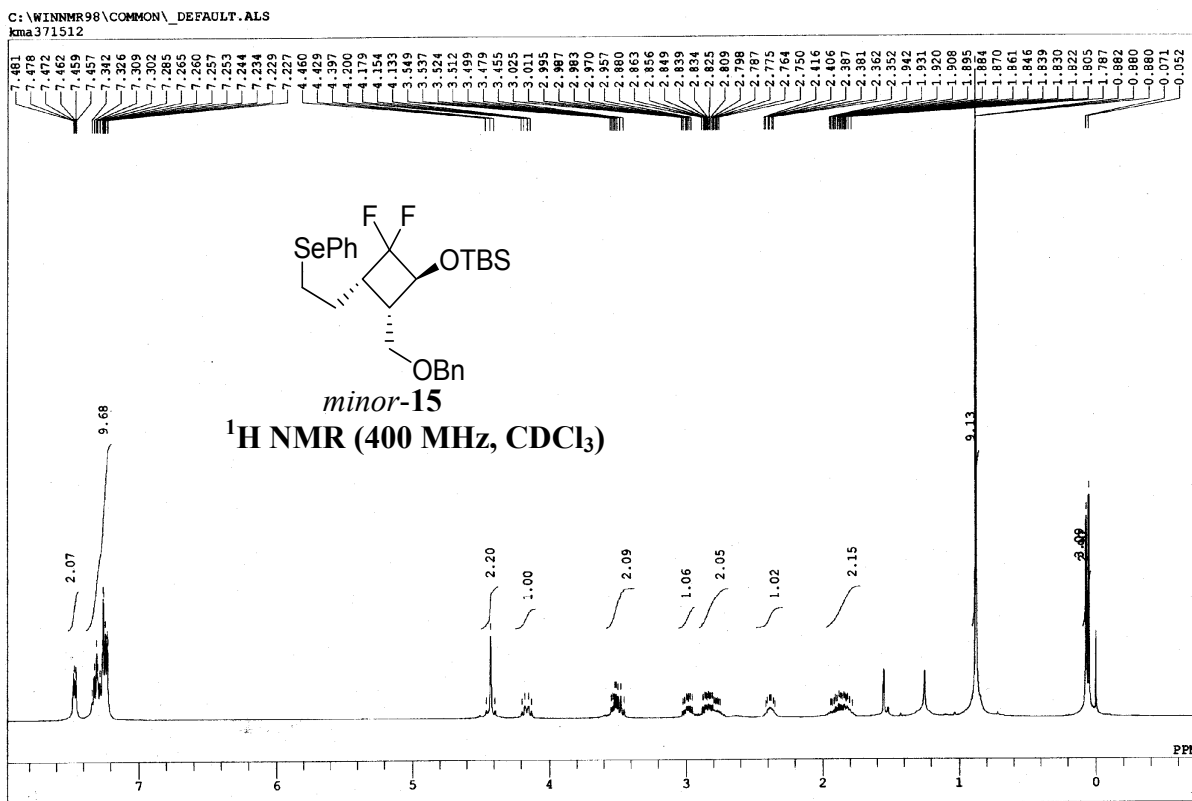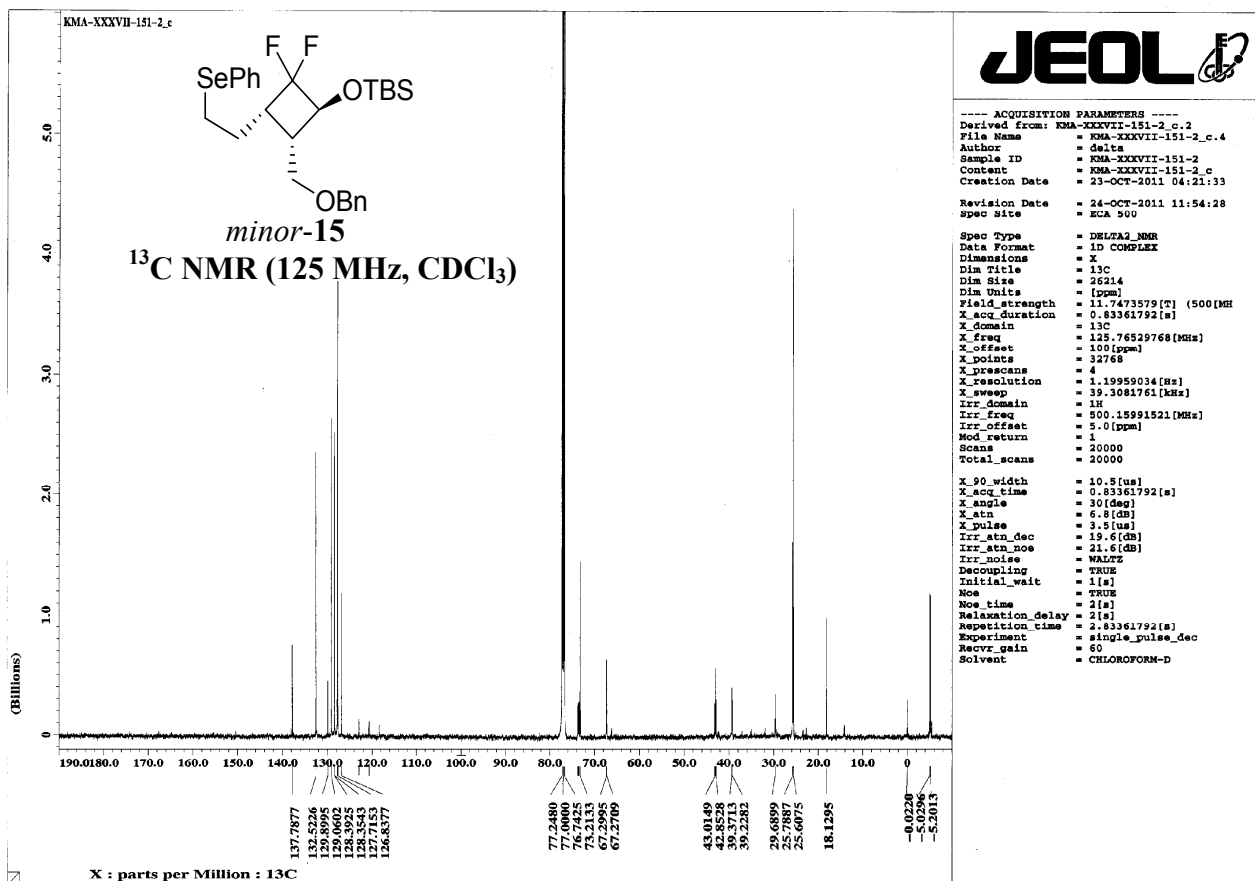

C:\WINNMR98\COMMON\DEFAULT.ALS  
 kma37152

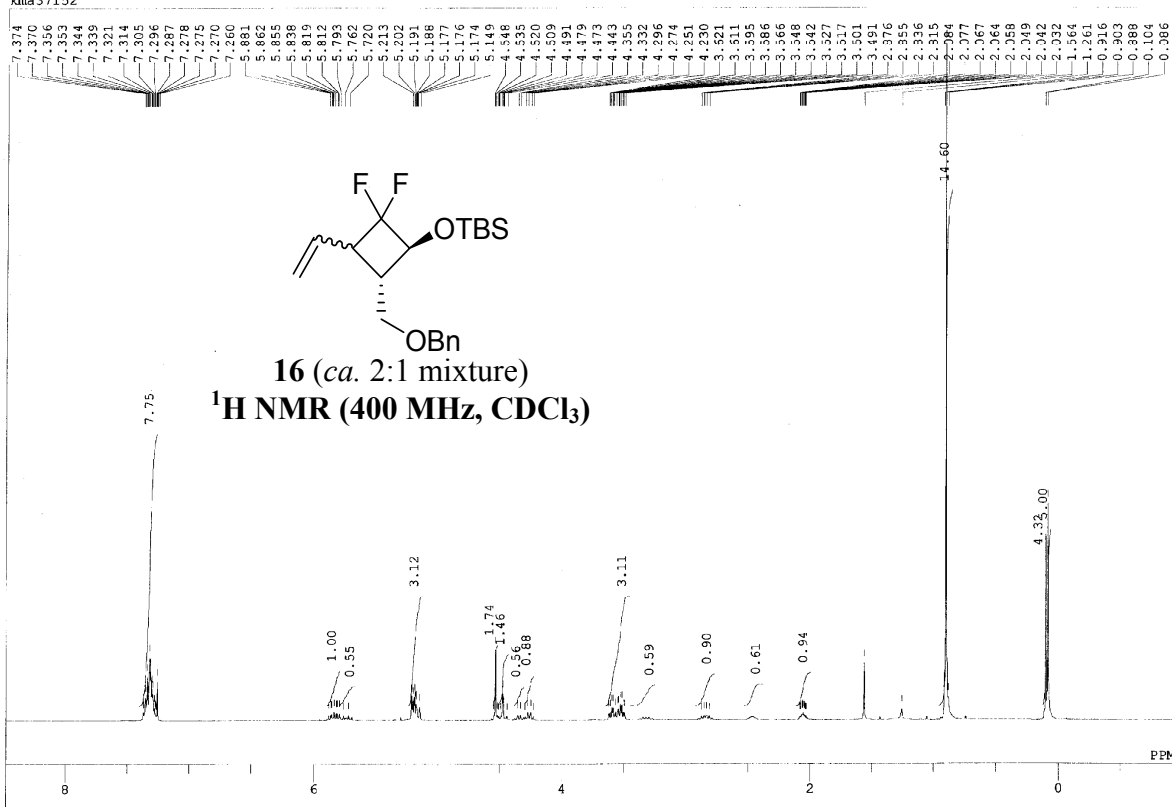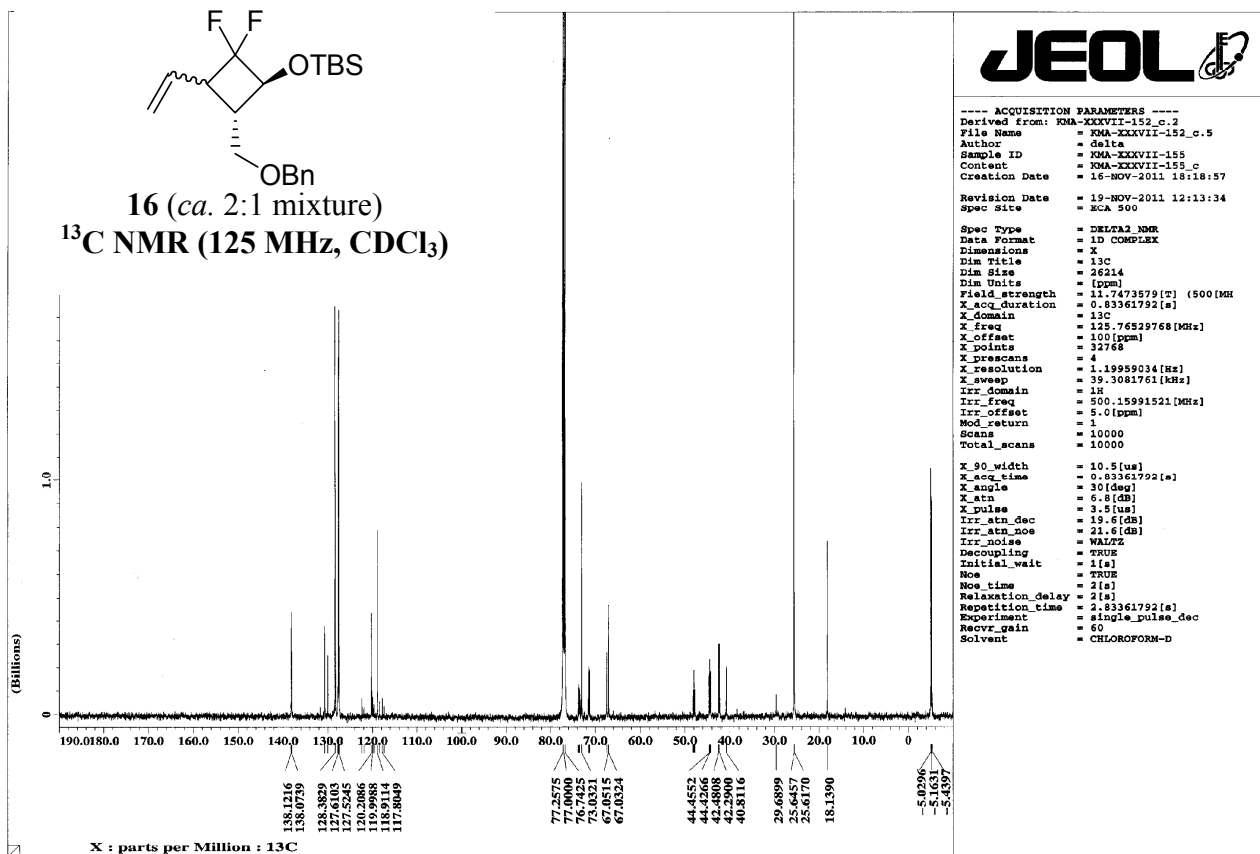



C:\WINNMR98\COMMON\_DEFAULT.ALS  
 kma37155

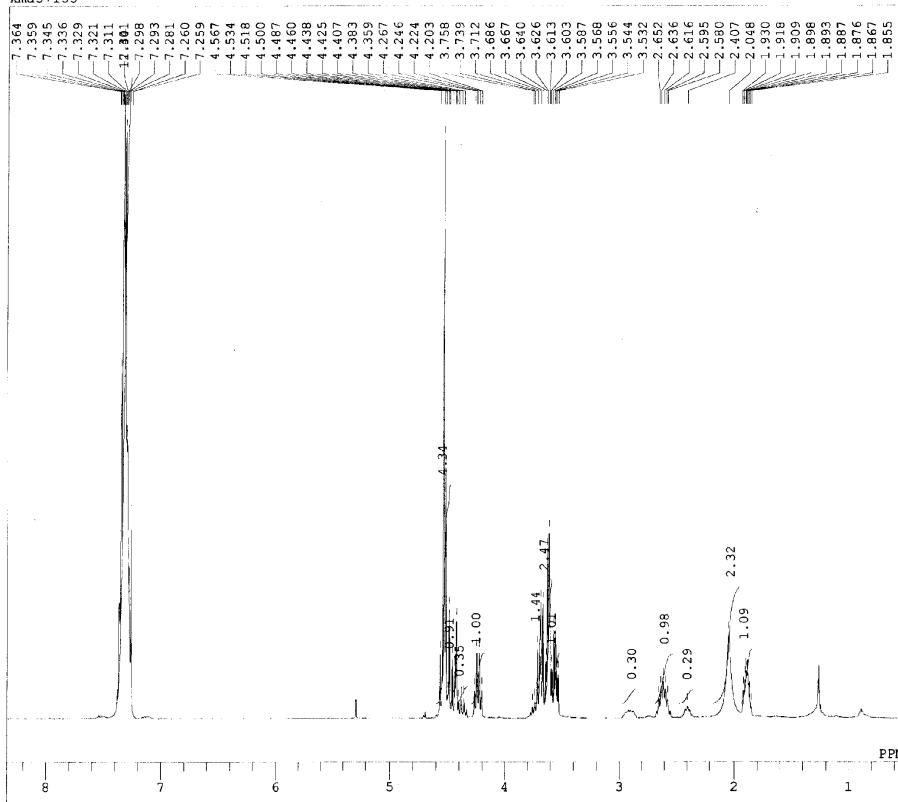

DFILE C:\WINNMR98\COMMON\_DEFAULT.ALS  
 COMPT kma37155  
 DATIM Tue Oct 11 08:31:26 2011  
 OBNUC 1H  
 EXMOD NON  
 OBFREQ 399.65 MHz  
 OBSST 124.00 KHz  
 OBFIN 10500.00 Hz  
 POINT 32763  
 FREQU 7992.01 Hz  
 SCANS 40  
 ACOTM 4.1001 sec  
 PD 2.9000 sec  
 EW1 5.80 usec  
 IRNUC 1H  
 CTEMP 23.4 c  
 SLVNT CDCL3  
 EXREF 7.26 ppm  
 BF 0.12 Hz  
 RGAIN 15

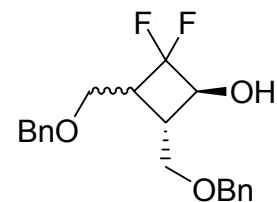

17 (ca. 3:1 mixture)  
<sup>1</sup>H NMR (400 MHz, CDCl<sub>3</sub>)

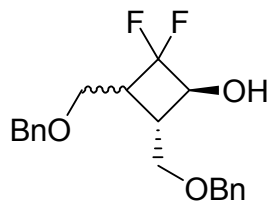

17 (ca. 3:1 mixture)  
<sup>13</sup>C NMR (125 MHz, CDCl<sub>3</sub>)

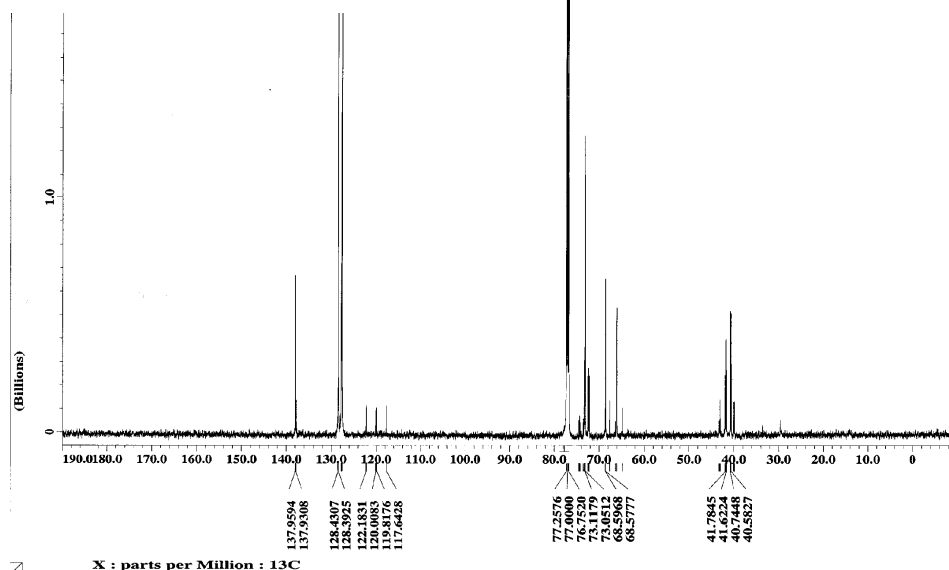

**JEOL**

----- ACQUISITION PARAMETERS -----  
 Derived from: kma-XXXVII-155\_c-1  
 File Name = kma-XXXVII-155\_c-4  
 Author = Delta  
 Sample ID = kma-XXXVII-155  
 Content = kma-XXXVII-155\_c  
 Creation Date = 17-NOV-2011 18:21:18  
 Revision Date = 19-NOV-2011 11:23:19  
 Spec site = ECA 500  
 Spec Type = DELTA2 NMR  
 Data Format = 1D COMPLEX  
 Dimensions = 2  
 Dim Title = 13C  
 Dim Size = 26214  
 Dim Units = [ppm]  
 Field\_strength = 11.7473579 [T] (500 MHz)  
 X\_acq\_duration = 0.83361792 [s]  
 X\_domain = 13C  
 X\_freq = 125.76529768 [MHz]  
 X\_offset = 100 [ppm]  
 X\_points = 32768  
 X\_prescans = 4  
 X\_resolution = 1.19959034 [Hz]  
 X\_sweep = 39.3081761 [kHz]  
 Irr\_domain = 1H  
 Irr\_freq = 500.15991921 [MHz]  
 Irr\_offset = 5.0 [ppm]  
 Mod\_return = 1  
 Scans = 10000  
 Total\_scans = 10000  
 X\_90\_width = 10.5 [us]  
 X\_acq\_time = 0.83361792 [s]  
 X\_angle = 30 [deg]  
 X\_atn = 6.8 [dB]  
 X\_pulse = 3.5 [us]  
 Irr\_atn\_dec = 19.6 [dB]  
 Irr\_atn\_noe = 21.6 [dB]  
 Irr\_noise = WALTZ  
 Decoupling = TRUZ  
 Initial\_wait = 1 [s]  
 Noe = TRUZ  
 Noe\_time = 2 [s]  
 Relaxation\_delay = 2 [s]  
 Repetition\_time = 0.83361792 [s]  
 Experiment = single\_pulse\_dec  
 Recvr\_gain = 60  
 Solvent = CHLOROFORM-D

C:\WINNMR98\COMMON\\_DEFAULT.ALS  
 kma38007

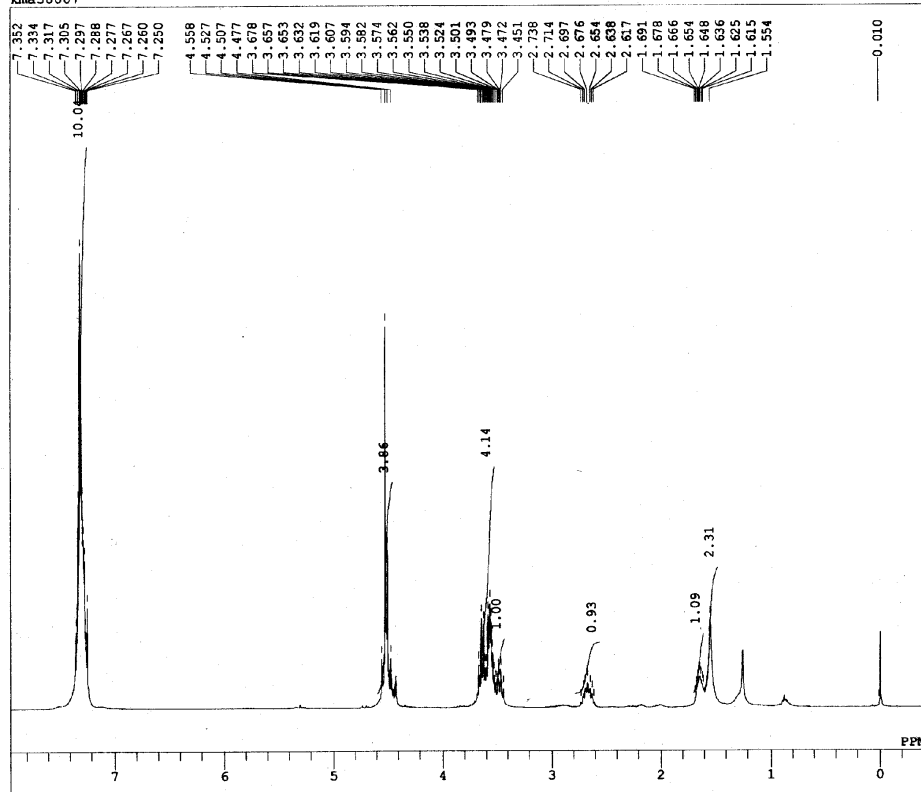

DFILE C:\WINNMR98\COMMON\\_DEFAULT.ALS  
 COMNT kma38007  
 DATIM Thu Oct 20 11:43:01 2011  
 OBNUC 1H  
 EXMOD NON  
 OBFREQ 399.65 MHz  
 OBFSET 124.00 KHz  
 OBFWIN 10500.00 Hz  
 POINT 32768  
 FREQU 7992.01 Hz  
 SCANS 40  
 ACQTM 4.1001 sec  
 PD 2.9000 sec  
 PW1 5.80 usec  
 IRNUC 1H  
 CTEMP 24.5 c  
 SLVNT CDCL3  
 EXREF 0.00 ppm  
 BF 0.12 Hz  
 RGAIN 12

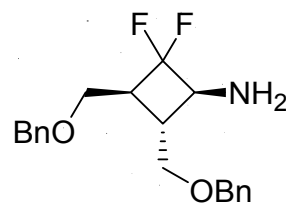

<sup>1</sup>H NMR (400 MHz, CDCl<sub>3</sub>)

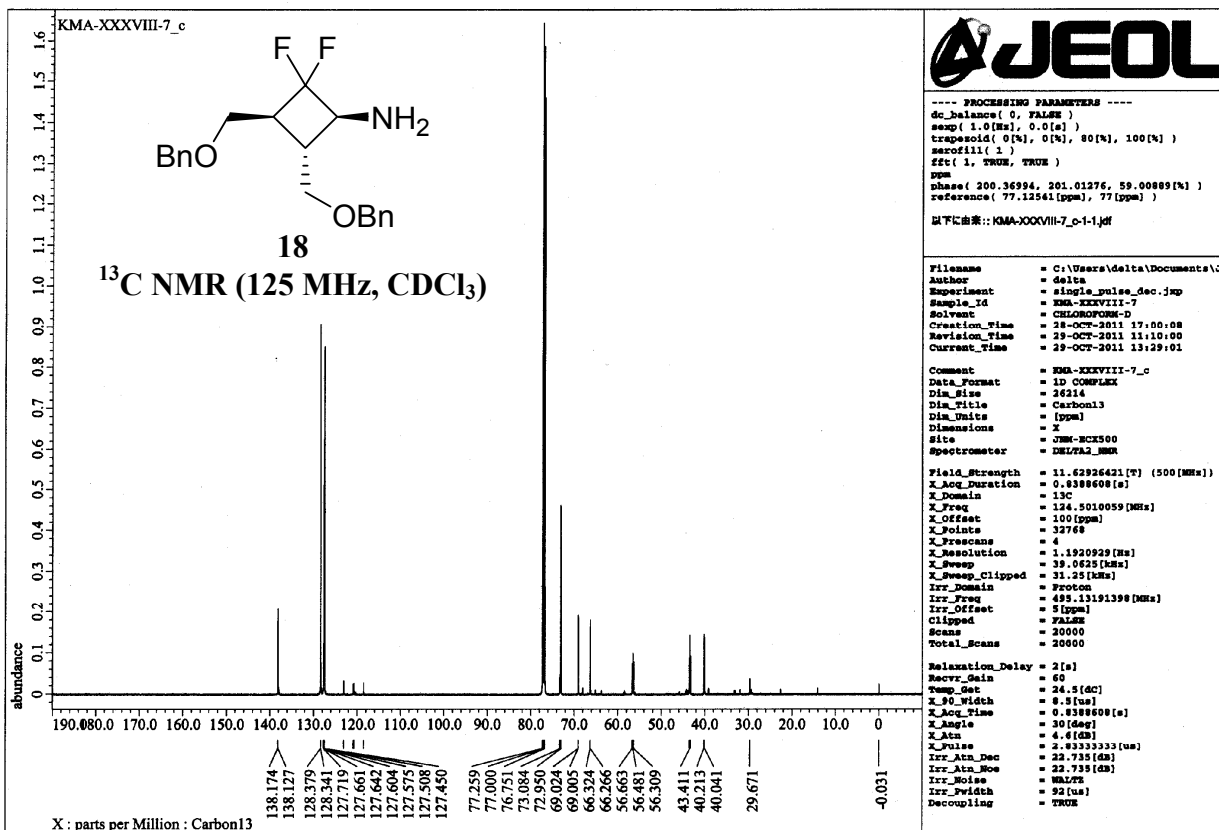

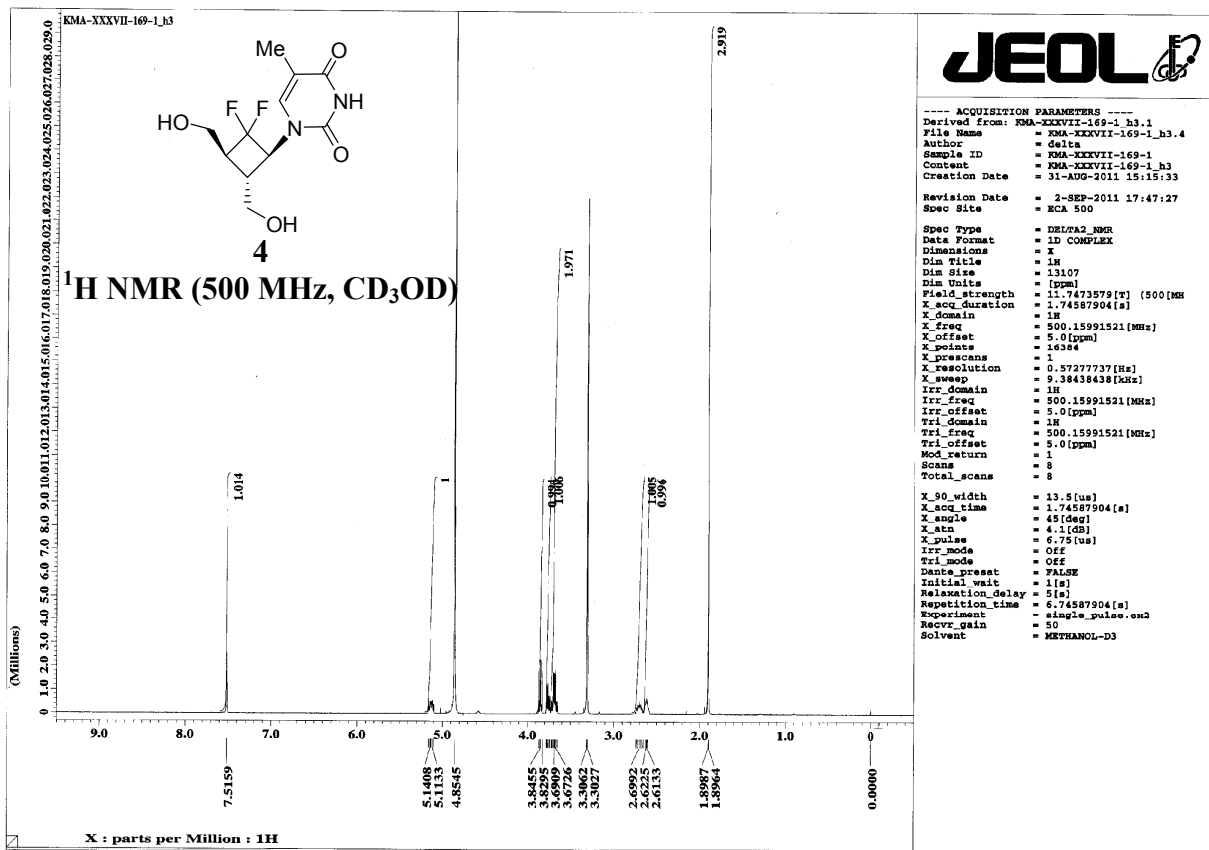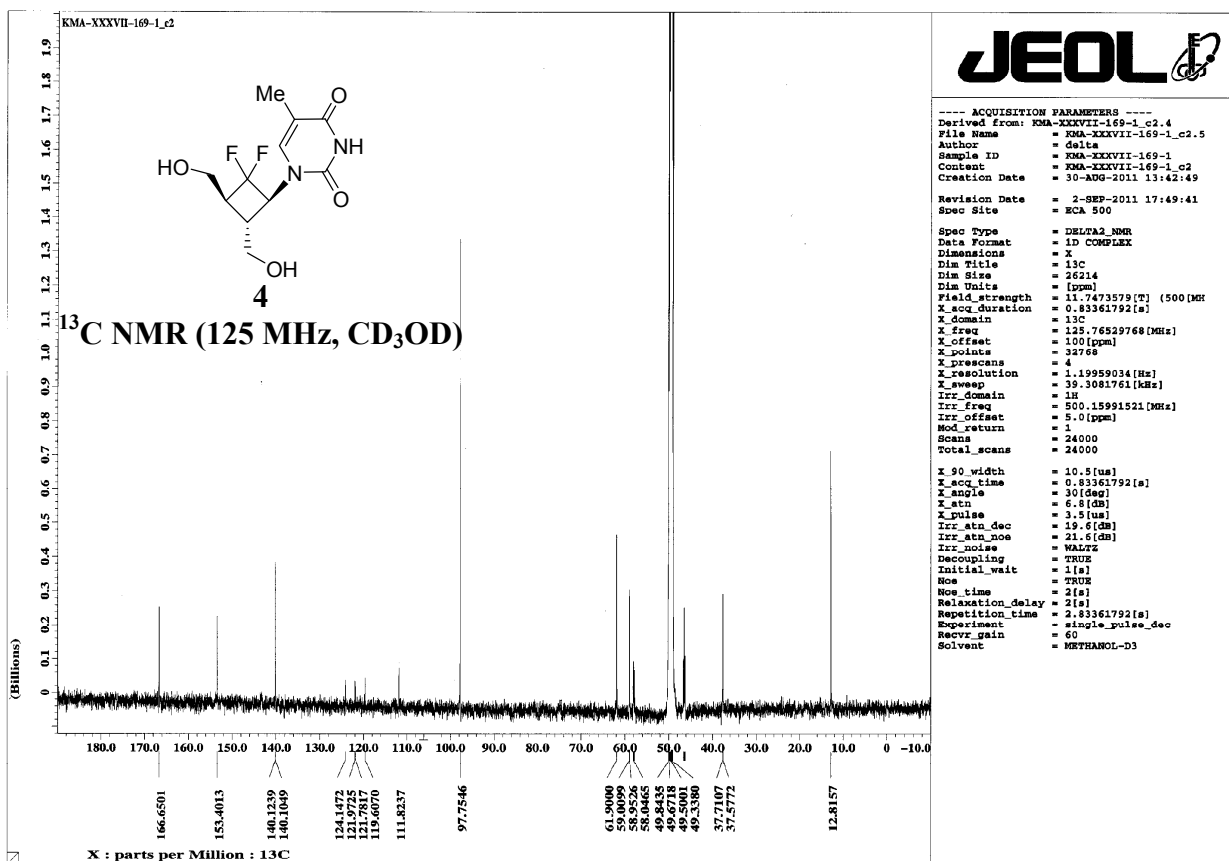

Supplement: c2cc35876j.pdf [file c2cc35876j.pdf]
